# Supplementary material for: Regioselective N-alkylation of 2-aminobenzothiazoles with benzylic alcohols
Source: Royal Society of Chemistry journal article supplement (doi:10.1039/c1cc10604j), 2011-01-01
Supplement: c1cc10604j.pdf [file c1cc10604j.pdf]

## Electronic Supplementary Information (ESI)

### Regioselective *N*-alkylation of 2-aminobenzothiazoles with benzylic alcohols

Feng Li,\* Haixia Shan, Qikai Kang and Lin Chen

*School of Chemical Engineering, Nanjing University of Science and Technology, Nanjing 210094, P. R. China*

#### General Experimental Details.

Infrared spectra were recorded on a Nicolet iS10 FT-IR spectrometer. High-resolution mass spectra (HRMS) were obtained on a HPLC-Q-ToF MS(Micro) spectrometer and are reported as *m/z* (relative intensity). Accurate masses are reported for the molecular ion  $[M+H]^+$ ,  $[M-H]^+$  or a suitable fragment ion. Melting points were measured on a X-6 micro-melting apparatus (Beijing Tech Instrument Co., Ltd). Proton nuclear magnetic resonance ( $^1\text{H}$  NMR) spectra were recorded at 500 MHz using a Bruker Avance 500 spectrometer. Chemical shifts are reported in delta ( $\delta$ ) units, parts per million (ppm) downfield from trimethylsilane or ppm relative to the center of the singlet at 7.26 ppm for  $\text{CDCl}_3$  and 2.50 ppm for  $\text{DMSO-d}_6$ . Coupling constants *J* values are reported in Hertz (Hz), and the splitting patterns were designated as follows: s, singlet; d, doublet; t, triplet; q, quartet; m, multiplet; b, broad. Carbon-13 nuclear magnetic resonance ( $^{13}\text{C}$  NMR) spectra were recorded at 125 MHz using a Bruker Avance 500 spectrometer. Chemical shifts are reported in delta ( $\delta$ ) units, ppm relative to the center of the triplet at 77.0 ppm for  $\text{CDCl}_3$  and 39.5 ppm for  $\text{DMSO-d}_6$ .  $^{13}\text{C}$  NMR spectra were routinely run with broadband decoupling.

All reactions were run under an atmosphere of nitrogen, unless otherwise indicated. Anhydrous solvents were transferred *via* oven-dried syringe. Reaction tubes were oven-dried and cooled under a stream of nitrogen. Reaction tubes were purchased from Beijing Synthware Glass Inc. Commercially unavailable 2-aminobenzothiazoles were readily prepared according to the previously reported procedures.<sup>1</sup> *p*-Xylene was distilled from calcium hydride. Analytical thin-layer chromatography (TLC) was carried out using 0.2-mm commercial silica gel plates.

#### General Procedure for the regioselective *N*-alkylation of 2-aminobenzothiazoles with alcohols.

To an oven-dried, nitrogen purged 20 ml Schlenk tube were added 2-aminobenzothiazole (1mmol), copper salt (0.01 mmol, 1 mol%), base (0.2 mmol, 20 mol%), alcohol (1.2 mmol, 120 mol%) and *p*-xylene (1 ml). The mixture was then heated at 130 °C for 12h, at which point the reaction mixture was allowed to cool to ambient temperature. The reaction mixture was concentrated in *vacuo* and purified by flash column chromatography with hexane/ethyl acetate to afford the corresponding product.

### N-benzylbenzo[d]thiazol-2-amine (1c)<sup>2</sup>

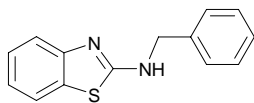

mp 164.4-165.2 °C (lit.<sup>2</sup> mp 164-168 °C); <sup>1</sup>H NMR (500 MHz, DMSO-d<sub>6</sub>) δ 8.51 (t, *J* = 5.5 Hz, 1H, NH), 7.67 (d, *J* = 7.8 Hz, 1H, ArH), 7.39-7.33 (m, 5H, ArH), 7.26 (t, *J* = 7.1 Hz, 1H, ArH), 7.22 (t, *J* = 7.7 Hz, 1H, ArH), 7.02 (t, *J* = 7.5 Hz, 1H, ArH), 4.60 (s, 2H, CH<sub>2</sub>N); <sup>13</sup>C NMR (125 MHz, DMSO-d<sub>6</sub>) δ 166.2, 152.4, 138.9, 130.4, 128.3, 127.3, 127.0, 125.5, 121.0, 120.9, 118.1, 47.2.

### N-(4-methylbenzyl)benzo[d]thiazol-2-amine (2c)<sup>3</sup>

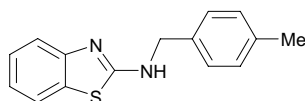

mp 188.9-189.4 °C (lit.<sup>3</sup> mp 186-188 °C); <sup>1</sup>H NMR (500 MHz, CDCl<sub>3</sub>) δ 7.56 (d, *J* = 7.9 Hz, 1H, ArH), 7.43 (d, *J* = 8.1 Hz, 1H, ArH), 7.29-7.25 (m, 3H, ArH), 7.16 (d, *J* = 7.8 Hz, 2H, ArH), 7.07 (t, *J* = 7.5 Hz, 1H, ArH), 6.38 (br s, 1H, NH), 4.58 (s, 2H, CH<sub>2</sub>N), 2.34 (s, 3H, CH<sub>3</sub>); <sup>13</sup>C NMR (125 MHz, CDCl<sub>3</sub>) δ 167.4, 152.2, 137.7, 134.4, 130.5, 129.5, 127.7, 126.0, 121.6, 120.8, 118.9, 49.2, 21.1.

### N-(4-methoxybenzyl)benzo[d]thiazol-2-amine (3c)<sup>4</sup>

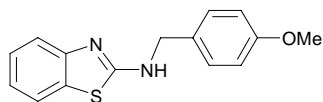

mp 173.5-174.0 °C; <sup>1</sup>H NMR (500 MHz, CDCl<sub>3</sub>) δ 7.58 (d, *J* = 7.8 Hz, 1H, ArH), 7.52 (d, *J* = 8.1 Hz, 1H, ArH), 7.33-7.28 (m, 3H, ArH), 7.09 (t, *J* = 7.6 Hz, 1H, ArH), 6.90-6.88 (m, 2H, ArH), 5.86 (br s, 1H, NH), 4.57 (s, 2H, CH<sub>2</sub>N), 3.81 (s, 3H, OCH<sub>3</sub>); <sup>13</sup>C NMR (125 MHz, CDCl<sub>3</sub>) δ 167.4, 159.3, 152.1, 130.4, 129.4, 129.1, 126.0, 121.6, 120.8, 118.8, 114.2, 55.3, 48.9.

### N-(4-fluorobenzyl)benzo[d]thiazol-2-amine (4c)<sup>4</sup>

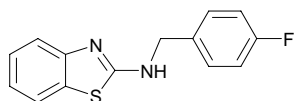

mp 148.0-149.2 °C; <sup>1</sup>H NMR (500 MHz, CDCl<sub>3</sub>) δ 7.58 (d, *J* = 7.8 Hz, 1H, ArH), 7.44 (d, *J* = 8.0 Hz,

1H, ArH), 7.37 (t,  $J = 6.8$  Hz, 2H, ArH), 7.28 (t,  $J = 7.8$  Hz, 1H, ArH), 7.10 (t,  $J = 7.6$  Hz, 1H, ArH), 7.04 (t,  $J = 8.6$  Hz, 2H, ArH), 6.43 (br s, 1H, NH), 4.60 (s, 2H, CH<sub>2</sub>N); <sup>13</sup>C NMR (125 MHz, CDCl<sub>3</sub>)  $\delta$  167.7, 162.4 (d,  $J_{C-F} = 243.8$  Hz), 152.0, 133.2 (d,  $J_{C-F} = 3.8$  Hz), 130.2, 129.3 (d,  $J_{C-F} = 8.1$  Hz), 126.0, 121.7, 120.8, 118.7, 115.6 (d,  $J_{C-F} = 20.8$  Hz), 48.6.

#### **N-(4-chlorobenzyl)benzo[d]thiazol-2-amine (5c)<sup>2</sup>**

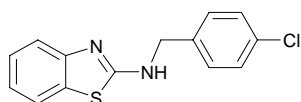

mp 188.2-188.8 °C (lit.<sup>2</sup> mp 175-180 °C); <sup>1</sup>H NMR (500 MHz, DMSO-d<sub>6</sub>)  $\delta$  8.53 (t,  $J = 5.7$  Hz, 1H, NH), 7.67 (d,  $J = 7.6$  Hz, 1H, ArH), 7.42-7.37 (m, 5H, ArH), 7.22 (t,  $J = 7.6$  Hz, 1H, ArH), 7.03 (t,  $J = 7.6$  Hz, 1H, ArH), 4.59 (d,  $J = 3.8$  Hz, 2H, CH<sub>2</sub>N); <sup>13</sup>C NMR (125 MHz, DMSO-d<sub>6</sub>)  $\delta$  166.0, 152.3, 138.0, 131.5, 130.4, 129.2, 128.3, 125.5, 121.0, 118.1, 46.3.

#### **N-(2-chlorobenzyl)benzo[d]thiazol-2-amine (6c)**

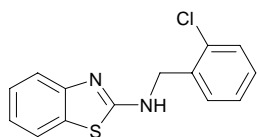

mp 134.7-135.2 °C; <sup>1</sup>H NMR (500 MHz, DMSO-d<sub>6</sub>)  $\delta$  8.54 (t,  $J = 5.4$  Hz, 1H, NH), 7.69 (d,  $J = 7.8$  Hz, 1H, ArH), 7.48 (dd,  $J = 6.6$  Hz and 2.1 Hz, 2H, ArH), 7.40 (d,  $J = 7.9$  Hz, 1H, ArH), 7.35-7.30 (m, 2H, ArH), 7.22 (t,  $J = 7.7$  Hz, 1H, ArH), 7.04 (t,  $J = 7.6$  Hz, 1H, ArH), 4.68 (s, 2H, CH<sub>2</sub>N); <sup>13</sup>C NMR (125 MHz, DMSO-d<sub>6</sub>)  $\delta$  166.0, 152.3, 135.9, 132.3, 130.5, 129.3, 129.1, 128.9, 127.3, 125.6, 121.1, 121.30, 118.2, 45.0; FTIR (net, cm<sup>-1</sup>) 3198, 3050, 1631, 1591, 1443, 1285; HRMS-EI (70 eV)  $m/z$  calcd for C<sub>14</sub>H<sub>12</sub>N<sub>2</sub>SCl [M+H]<sup>+</sup> 275.0410, found 275.0411.

#### **N-(4-bromobenzyl)benzo[d]thiazol-2-amine (7c)<sup>5</sup>**

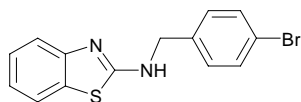

mp 195.1-195.6 °C (lit.<sup>5</sup> mp 197-200 °C); <sup>1</sup>H NMR (500 MHz, DMSO-d<sub>6</sub>)  $\delta$  8.54 (s, 1H, NH), 7.67 (d,  $J = 7.9$  Hz, 1H, ArH), 7.54 (d,  $J = 8.5$  Hz, 2H, ArH), 7.39-7.33 (m, 3H, ArH), 7.22 (t,  $J = 7.6$  Hz, 1H, ArH), 7.03 (t,  $J = 7.6$  Hz, 1H, ArH), 4.57 (s, 2H, CH<sub>2</sub>N); <sup>13</sup>C NMR (125 MHz, DMSO-d<sub>6</sub>)  $\delta$  166.0,

152.3, 138.4, 131.2, 130.4, 129.5, 125.5, 121.0, 120.9, 120.0, 118.1, 46.3; HRMS-EI (70 eV)  $m/z$  calcd for  $C_{14}H_{12}N_2SBr$   $[M+H]^+$  318.9905, found 318.9905.

### N-(4-(trifluoromethyl)benzyl)benzo[d]thiazol-2-amine (8c)

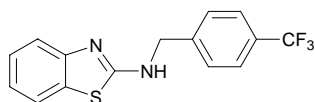

mp 164.2-164.8 °C;  $^1H$  NMR (500 MHz, DMSO- $d_6$ )  $\delta$  8.63 (t,  $J$  = 5.9 Hz, 1H, NH), 7.72 (d,  $J$  = 8.2 Hz, 2H, ArH), 7.69 (dd,  $J$  = 7.9 Hz, 1H, ArH), 7.60 (d,  $J$  = 8.0 Hz, 2H, ArH), 7.38 (d,  $J$  = 8.0 Hz, 1H, ArH), 7.22 (t,  $J$  = 7.8 Hz, 1H, ArH), 7.03 (t,  $J$  = 7.7 Hz, 1H, ArH), 4.70 (d,  $J$  = 5.7 Hz, 2H,  $CH_2N$ );  $^{13}C$  NMR (125 MHz, DMSO- $d_6$ )  $\delta$  166.6, 152.8, 144.5, 130.9, 128.4, 128.1 (q,  $J_{C-F}$  = 31.6 Hz), 126.0, 125.7 (q,  $J_{C-F}$  = 3.6 Hz), 124.8 (q,  $J_{C-F}$  = 270.0 Hz), 121.6, 121.5, 118.7, 47.1; FTIR (net,  $cm^{-1}$ ) 3139, 3089, 1606, 1558, 1448, 1267; HRMS-EI (70 eV)  $m/z$  calcd for  $C_{15}H_{12}N_2F_3S$   $[M+H]^+$  309.0673, found 309.0678.

### N-(4-(trifluoromethoxy)benzyl)benzo[d]thiazol-2-amine (9c)

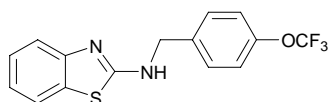

mp 149.8-150.7 °C;  $^1H$  NMR (500 MHz, DMSO- $d_6$ )  $\delta$  8.55 (t,  $J$  = 5.8 Hz, 1H, NH), 7.68 (d,  $J$  = 7.4 Hz, 1H, ArH), 7.50 (d,  $J$  = 8.5 Hz, 2H, ArH), 7.39-7.34 (m, 3H, ArH), 7.22 (t,  $J$  = 7.7 Hz, 1H, ArH), 7.03 (t,  $J$  = 7.6 Hz, 1H, ArH), 4.63 (d,  $J$  = 5.9 Hz, 2H,  $CH_2N$ );  $^{13}C$  NMR (125 MHz, DMSO- $d_6$ )  $\delta$  166.1, 152.4, 147.3, 138.6, 130.4, 129.2, 125.5, 121.1, 120.99, 120.95, 120.1 (q,  $J_{C-F}$  = 254.6 Hz), 118.2, 46.4; FTIR (net,  $cm^{-1}$ ) 3180, 3086, 1614, 1576, 1449, 1210; HRMS-EI (70 eV)  $m/z$  calcd for  $C_{15}H_{12}N_2OSF_3$   $[M+H]^+$  325.0622, found 325.0615.

### N-(3,4-dimethoxybenzyl)benzo[d]thiazol-2-amine (10c)

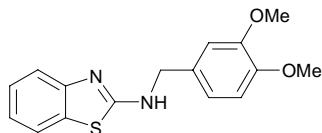

mp 145.8-146.6 °C;  $^1H$  NMR (500 MHz,  $CDCl_3$ )  $\delta$  7.57 (d,  $J$  = 7.7 Hz, 1H, ArH), 7.45 (d,  $J$  = 8.1 Hz, 1H, ArH), 7.27 (t,  $J$  = 6.6 Hz, 1H, ArH), 7.08 (t,  $J$  = 7.4 Hz, 1H, ArH), 6.93 (t,  $J$  = 6.8 Hz, 2H, ArH),

6.83 (d,  $J = 7.9$  Hz, 1H, ArH), 6.43 (br s, 1H, NH), 4.55 (s, 2H, CH<sub>2</sub>N), 3.87 (s, 3H, OCH<sub>3</sub>), 3.82 (s, 3H, OCH<sub>3</sub>); <sup>13</sup>C NMR (125 MHz, CDCl<sub>3</sub>)  $\delta$  167.9, 152.0, 149.2, 148.6, 130.1, 129.9, 125.9, 121.4, 120.7, 120.0, 118.6, 111.2, 110.8, 55.8, 55.7, 49.3; FTIR (net, cm<sup>-1</sup>) 3184, 3085, 1598, 1549, 1444, 1260; HRMS-EI (70 eV)  $m/z$  calcd for C<sub>16</sub>H<sub>17</sub>N<sub>2</sub>O<sub>2</sub>S [M+H]<sup>+</sup> 301.1011, found 301.1011.

### N-(2,4-dichlorobenzyl)benzo[d]thiazol-2-amine (11c)

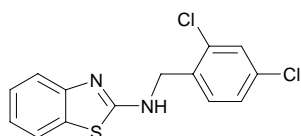

mp 144.8-145.2 °C; <sup>1</sup>H NMR (500 MHz, CDCl<sub>3</sub>)  $\delta$  7.57 (d,  $J = 7.9$  Hz, 1H, ArH), 7.48 (d,  $J = 8.0$  Hz, 1H, ArH), 7.44 (d,  $J = 8.3$  Hz, 1H, ArH), 7.41 (d,  $J = 2.2$  Hz, 1H, ArH), 7.28 (t,  $J = 7.7$  Hz, 1H, ArH), 7.21 (dd,  $J = 8.3$  Hz and 2.1 Hz, 1H, ArH), 7.09 (t,  $J = 7.6$  Hz, 1H, ArH), 6.27 (br s, 1H, NH), 4.70 (s, 2H, CH<sub>2</sub>N); <sup>13</sup>C NMR (125 MHz, CDCl<sub>3</sub>)  $\delta$  167.5, 152.0, 134.2, 134.1, 133.7, 130.3, 130.2, 129.5, 127.4, 126.1, 121.8, 120.9, 118.9, 46.5; FTIR (net, cm<sup>-1</sup>) 3178, 3083, 1606, 1585, 1445, 1221; HRMS-EI (70 eV)  $m/z$  calcd for C<sub>11</sub>H<sub>15</sub>N<sub>2</sub>S<sub>2</sub>Cl<sub>2</sub> [M+H]<sup>+</sup> 309.0054, found 309.0050.

### N-(naphthalen-1-ylmethyl)benzo[d]thiazol-2-amine (12c)

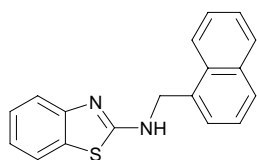

mp 150.1-150.8 °C; <sup>1</sup>H NMR (500 MHz, DMSO-d<sub>6</sub>)  $\delta$  8.55 (t,  $J = 5.3$  Hz, 1H, NH), 8.13 (d,  $J = 8.1$  Hz, 1H, ArH), 7.98 (d,  $J = 7.8$  Hz, 1H, ArH), 7.88 (d,  $J = 8.2$  Hz, 1H, ArH), 7.68 (d,  $J = 7.9$  Hz, 1H, ArH), 7.60-7.54 (m, 3H, ArH), 7.49 (t,  $J = 7.6$  Hz, 1H, ArH), 7.41 (d,  $J = 8.0$ , 1H, ArH), 7.23 (t,  $J = 7.7$  Hz, 1H, ArH), 7.03 (t,  $J = 7.6$  Hz, 1H, ArH), 5.07 (d,  $J = 5.4$  Hz, 2H, CH<sub>2</sub>N); <sup>13</sup>C NMR (125 MHz, DMSO-d<sub>6</sub>)  $\delta$  166.5, 152.9, 134.5, 133.8, 131.5, 131.0, 129.0, 128.3, 126.8, 126.4, 126.1, 126.0, 125.9, 124.0, 121.5, 121.4, 118.6, 45.9; FTIR (net, cm<sup>-1</sup>) 3139, 3045, 1608, 1557, 1448, 1275; HRMS-EI (70 eV)  $m/z$  calcd for C<sub>18</sub>H<sub>15</sub>N<sub>2</sub>S [M+H]<sup>+</sup> 291.0956, found 291.0953.

### N-(pyridin-2-ylmethyl)benzo[d]thiazol-2-amine (13c)

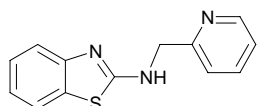

mp 156.9-157.5 °C; <sup>1</sup>H NMR (500 MHz, DMSO-d<sub>6</sub> at 353k) δ 8.54 (s, 1H, NH), 8.33 (brs, 1H, ArH), 7.74 (t, *J* = 7.6 Hz, 1H, ArH), 7.64 (d, *J* = 7.8 Hz, 1H, ArH), 7.42 (d, *J* = 7.5 Hz, 1H, ArH), 7.37 (d, *J* = 7.9 Hz, 1H, ArH), 7.25 (t, *J* = 5.5 Hz, 1H, ArH), 7.20 (t, *J* = 7.6 Hz, 1H, ArH), 7.00 (t, *J* = 7.6 Hz, 1H, ArH), 4.69 (s, 2H, CH<sub>2</sub>N); <sup>13</sup>C NMR (125 MHz, DMSO-d<sub>6</sub> at 353k) δ 160.0, 157.8, 152.1, 148.4, 136.2, 130.2, 125.0, 121.8, 121.0, 120.6, 120.4, 117.8, 48.9; FTIR (net, cm<sup>-1</sup>) 3241, 3036, 1596, 1567, 1455, 1251; HRMS-EI (70 eV) *m/z* calcd for C<sub>13</sub>H<sub>12</sub>N<sub>3</sub>S [M+H]<sup>+</sup> 242.0752, found 242.0751.

#### N-benzyl-6-methylbenzo[d]thiazol-2-amine (14c)<sup>6</sup>

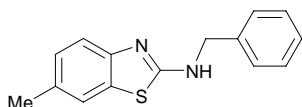

mp 179.7-180.2 °C (lit.<sup>6</sup> mp 176-178 °C); <sup>1</sup>H NMR (500 MHz, DMSO-d<sub>6</sub>) δ 8.39 (t, *J* = 5.7 Hz, 1H, NH), 7.46 (s, 1H, ArH), 7.39-7.33 (m, 4H, ArH), 7.28-7.24 (m, 2H, ArH), 7.02 (d, *J* = 8.0 Hz, 1H, ArH), 4.58 (s, 2H, CH<sub>2</sub>N), 2.31 (s, 3H, CH<sub>3</sub>); <sup>13</sup>C NMR (125 MHz, DMSO-d<sub>6</sub>) δ 165.4, 150.3, 139.0, 130.5, 130.1, 128.3, 127.4, 127.0, 126.5, 120.9, 117.8, 47.1, 20.7.

#### N-benzyl-4,6-dimethylbenzo[d]thiazol-2-amine (15c)

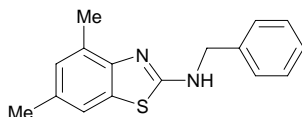

mp 115.0-115.8 °C; <sup>1</sup>H NMR (500 MHz, DMSO-d<sub>6</sub>) δ 8.37 (t, *J* = 5.7 Hz, 1H, NH), 7.40 (d, *J* = 7.5 Hz, 2H, ArH), 7.34 (t, *J* = 7.5 Hz, 2H, ArH), 7.26 (t, *J* = 6.6 Hz, 2H, ArH), 6.87 (s, 1H, ArH), 4.56 (d, *J* = 5.8 Hz, 2H, CH<sub>2</sub>N), 2.39 (s, 3H, CH<sub>3</sub>), 2.27 (s, 3H, CH<sub>3</sub>); <sup>13</sup>C NMR (125 MHz, DMSO-d<sub>6</sub>) δ 164.9, 149.2, 139.1, 129.9, 129.8, 128.3, 127.6, 127.4, 127.0, 126.8, 118.2, 47.4, 20.7, 18.0; FTIR (net, cm<sup>-1</sup>) 3222, 3029, 1594, 1561, 1451, 1274; HRMS-EI (70 eV) *m/z* calcd for C<sub>16</sub>H<sub>17</sub>N<sub>2</sub>S [M+H]<sup>+</sup> 269.1112, found 269.1111.

#### N-benzyl-6-methoxybenzo[d]thiazol-2-amine (16c)

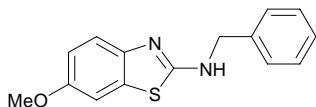

mp 133.4-134.7 °C; <sup>1</sup>H NMR (500 MHz, DMSO-d<sub>6</sub>) δ 8.28 (t, *J* = 5.8 Hz, 1H, NH), 7.38-7.24 (m, 7H,

ArH), 6.82 (dd,  $J = 8.7$  Hz and  $2.6$  Hz, 1H, ArH), 4.56 (d,  $J = 5.7$  Hz, 2H, CH<sub>2</sub>N), 3.73 (s, 3H, OCH<sub>3</sub>); <sup>13</sup>C NMR (125 MHz, DMSO-d<sub>6</sub>) δ 164.6, 154.4, 146.5, 139.1, 131.4, 128.3, 127.3, 126.9, 118.4, 112.9, 105.6, 55.5, 47.2; FTIR (net, cm<sup>-1</sup>) 3171, 3092, 1606, 1557, 1445, 1261; HRMS-EI (70 eV)  $m/z$  calcd for C<sub>15</sub>H<sub>15</sub>N<sub>2</sub>OS [M+H]<sup>+</sup> 271.0905, found 271.0909.

### N-benzyl-6-(methylthio)benzo[d]thiazol-2-amine (17c)

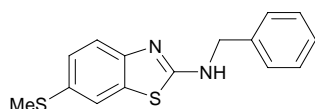

mp 176.8-177.2 °C; <sup>1</sup>H NMR (500 MHz, DMSO-d<sub>6</sub>) δ 8.51 (t,  $J = 5.6$  Hz, 1H, NH), 7.66 (d,  $J = 1.3$  Hz, 1H, ArH), 7.38-7.31 (m, 5H, ArH), 7.27 (t,  $J = 7.0$  Hz, 1H, ArH), 7.16 (dd,  $J = 8.3$  Hz and  $1.6$  Hz, 1H, ArH), 4.58 (d,  $J = 5.6$  Hz, 2H, CH<sub>2</sub>N), 2.46 (s, 3H, SCH<sub>3</sub>); <sup>13</sup>C NMR (125 MHz, DMSO-d<sub>6</sub>) δ 166.0, 150.6, 138.8, 131.6, 129.3, 128.3, 127.4, 127.0, 125.6, 119.9, 118.3, 47.2, 16.6; FTIR (net, cm<sup>-1</sup>) 3174, 3088, 1603, 1567, 1445, 1260; HRMS-EI (70 eV)  $m/z$  calcd for C<sub>15</sub>H<sub>15</sub>N<sub>2</sub>S [M+H]<sup>+</sup> 287.0677, found 287.0686.

### N-benzyl-6-fluorobenzo[d]thiazol-2-amine (18c)<sup>2</sup>

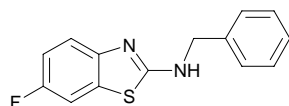

mp 191.1-192.0 °C (lit.<sup>2</sup> mp 180-184 °C); <sup>1</sup>H NMR (500 MHz, DMSO-d<sub>6</sub>) δ 8.49 (t,  $J = 5.9$  Hz, 1H, NH), 7.61 (dd,  $J = 8.7$  Hz and  $2.8$  Hz, 1H, ArH), 7.38-7.33 (m, 5H, ArH), 7.27 (t,  $J = 6.9$  Hz, 1H, ArH), 7.05 (dd,  $J = 9.1$  Hz and  $2.7$  Hz, 1H, ArH), 4.58 (s, 2H, CH<sub>2</sub>N); <sup>13</sup>C NMR (125 MHz, DMSO-d<sub>6</sub>) δ 166.0 (d,  $J_{C-F} = 13.8$  Hz), 157.2 (d,  $J_{C-F} = 233.8$  Hz), 149.1, 138.8, 131.4 (d,  $J_{C-F} = 10.8$  Hz), 128.4, 127.4, 127.0, 118.5 (d,  $J_{C-F} = 8.6$  Hz), 112.8 (d,  $J_{C-F} = 23.5$  Hz), 107.8 (d,  $J_{C-F} = 27.1$  Hz), 47.1; HRMS-EI (70 eV)  $m/z$  calcd for C<sub>14</sub>H<sub>12</sub>N<sub>2</sub>SF [M+H]<sup>+</sup> 259.0705, found 259.0706.

### N-benzyl-6-chlorobenzo[d]thiazol-2-amine (19c)

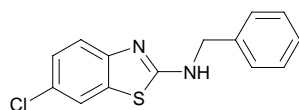

mp 194.7-195.1 °C; <sup>1</sup>H NMR (500 MHz, DMSO-d<sub>6</sub>) δ 8.62 (s, 1H, NH), 7.80 (s, 1H, ArH), 7.37-7.22 (m, 7H, ArH), 4.59 (d,  $J = 4.3$  Hz, 2H, CH<sub>2</sub>N); <sup>13</sup>C NMR (125 MHz, DMSO-d<sub>6</sub>) δ 166.8, 151.4, 138.7,

132.1, 128.4, 127.4, 127.0, 125.6, 124.7, 120.6, 118.9, 47.2; FTIR (net,  $\text{cm}^{-1}$ ) 3183, 3086, 1616, 1573, 1447, 1263; HRMS-EI (70 eV)  $m/z$  calcd for  $\text{C}_{14}\text{H}_{12}\text{N}_2\text{SCI}$   $[\text{M}+\text{H}]^+$  275.0410, found 275.0407.

**N-benzyl-6-(trifluoromethoxy)benzo[d]thiazol-2-amine (20c)**

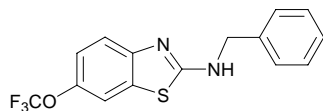

mp 176.2-177.1 °C;  $^1\text{H}$  NMR (500 MHz,  $\text{DMSO-d}_6$ )  $\delta$  8.67 (t,  $J = 5.4$  Hz, 1H, NH), 7.81 (s, 1H, ArH), 7.43 (d,  $J = 8.6$  Hz, 1H, ArH), 7.38-7.34 (m, 4H, ArH), 7.27 (t,  $J = 6.8$  Hz, 1H, ArH), 7.20 (d,  $J = 8.4$  Hz, 1H, ArH), 4.61 (d,  $J = 4.9$  Hz, 2H,  $\text{CH}_2\text{N}$ );  $^{13}\text{C}$  NMR (125 MHz,  $\text{DMSO-d}_6$ )  $\delta$  167.4, 151.6, 142.2, 138.6, 131.5, 128.3, 127.3, 127.0, 120.2 (q,  $J_{\text{C-F}} = 254.0$  Hz), 119.0, 118.3, 114.4, 47.2; FTIR (net,  $\text{cm}^{-1}$ ) 3195, 3094, 1620, 1587, 1461, 1250; HRMS-EI (70 eV)  $m/z$  calcd for  $\text{C}_{15}\text{H}_{12}\text{N}_2\text{OF}_3\text{S}$   $[\text{M}+\text{H}]^+$  325.0622, found 325.0630.



## References

- 1 P. Jimonet, F. Audiau, M. Barreau, J. C. Blanchard, A. Boireau, Y. Bour, M. A. Coleno, A. Doble, G. Doerflinger, C. D. Huu, M. H. Donat, J. M. Duchesne, P. Ganil, C. Gueremy, E. Honore, B. Just, R. Kerphirique, S. Gontier, P. Hubert, P. M. Laduron, J. L. Blevec, M. Meunier, J. M. Miquet, C. Nemecek, M. Pasquet, O. Piot, J. Pratt, J. Rataud, M. Reibaud, J. M. Stutzmann and S. Mignani, *J. Med. Chem.*, 1999, **42**, 2828.
- 2 L. L. Joyce, G. Evindar; R and A. Batey, *Chem. Commun.*, 2004, 446.
- 3 M. B. Valentín, D. Francisca, B. Carolina, G. N. Luis, I. Luisa and A. B. Julio, *Tetrahedron*, 2000, **56**, 2481.
- 4 E. G. Feng, H. Huang, Y. Zhou, D. Ye, H. L. Jiang and H. Liu, *J. Comb. Chem.*, 2010, **12**, 422.
- 5 A. Ballistrer, A. Bottino, G. Musumarra, R. Fioravanti, M. Biava, G. C. Porretta, N. Simonetti and A. Villa, *J. Phys. Org. Chem.*, 1996, **9**, 61.
- 6 G. D. Shen, X. Lv and W. L. Bao, *Eur. J. Org. Chem.*, 2009, 5897.

N-benzylbenzo[d]thiazol-2-amine  
PROTON DMSO-d6

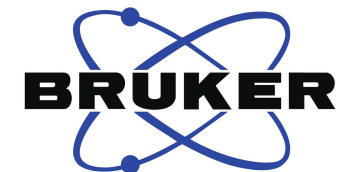

8.508  
8.497  
8.486  
7.674  
7.659  
7.392  
7.376  
7.361  
7.346  
7.331  
7.277  
7.263  
7.248  
7.232  
7.217  
7.201  
7.034  
7.019  
7.004

4.602  
4.596

2.503

0.000

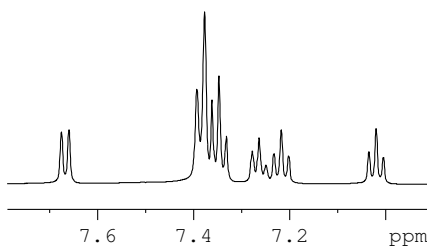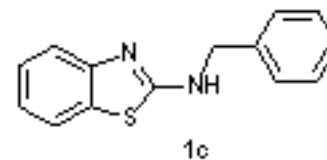

Current Data Parameters  
NAME Lifeng-1H  
EXPNO 125  
PROCNO 1

F2 - Acquisition Parameters  
Date\_ 20100729  
Time 2.10  
INSTRUM spect  
PROBHD 5 mm PABBO BB-  
PULPROG zg30  
TD 65536  
SOLVENT DMSO  
NS 16  
DS 2  
SWH 10330.578 Hz  
FIDRES 0.157632 Hz  
AQ 3.171923 sec  
RG 203  
DW 48.400 usec  
DE 6.50 usec  
TE 298.7 K  
D1 1.00000000 sec  
TD0 1

==== CHANNEL f1 =====  
NUC1 1H  
P1 11.50 usec  
PL1 1.10 dB  
PL1W 16.96364784 W  
SFO1 500.0330879 MHz

F2 - Processing parameters  
SI 32768  
SF 500.0300013 MHz  
WDW EM  
SSB 0  
LB 0.30 Hz  
GB 0  
PC 1.00

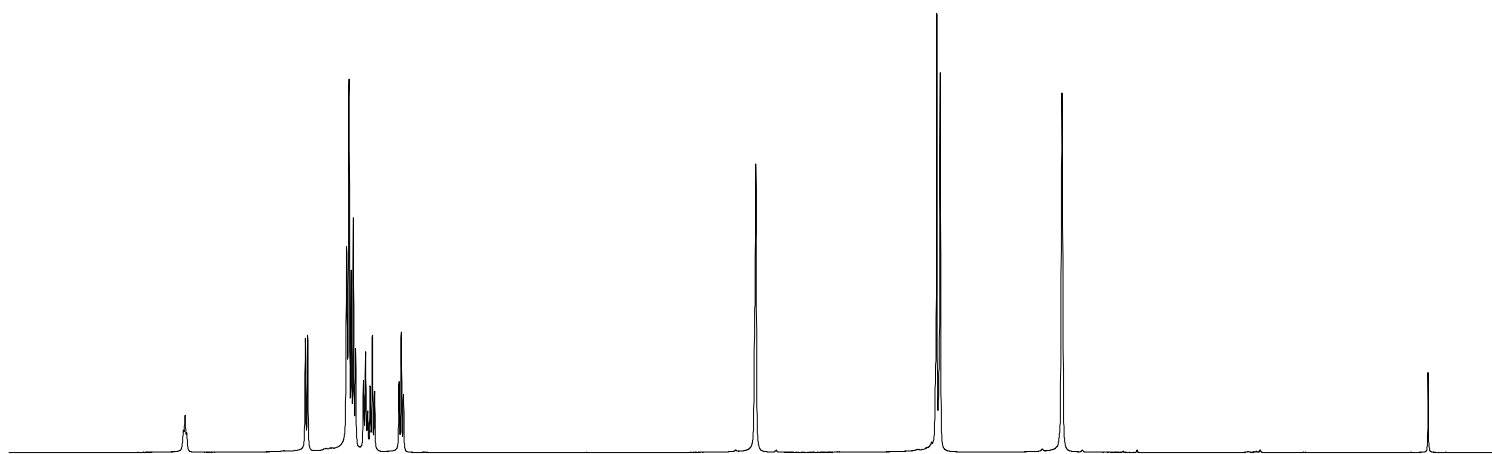

9

8

6

5

4

3

2

1

ppm

0.44

1.02

4.49

0.89

0.92

0.93

2.00

N-benzylbenzo[d]thiazol-2-amine  
C13CPD DMSO-d6

166.24  
152.42  
138.90  
130.39  
128.34  
127.35  
126.99  
125.51  
120.95  
120.89  
118.08

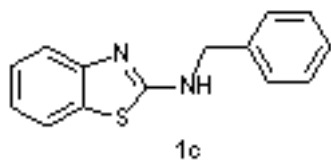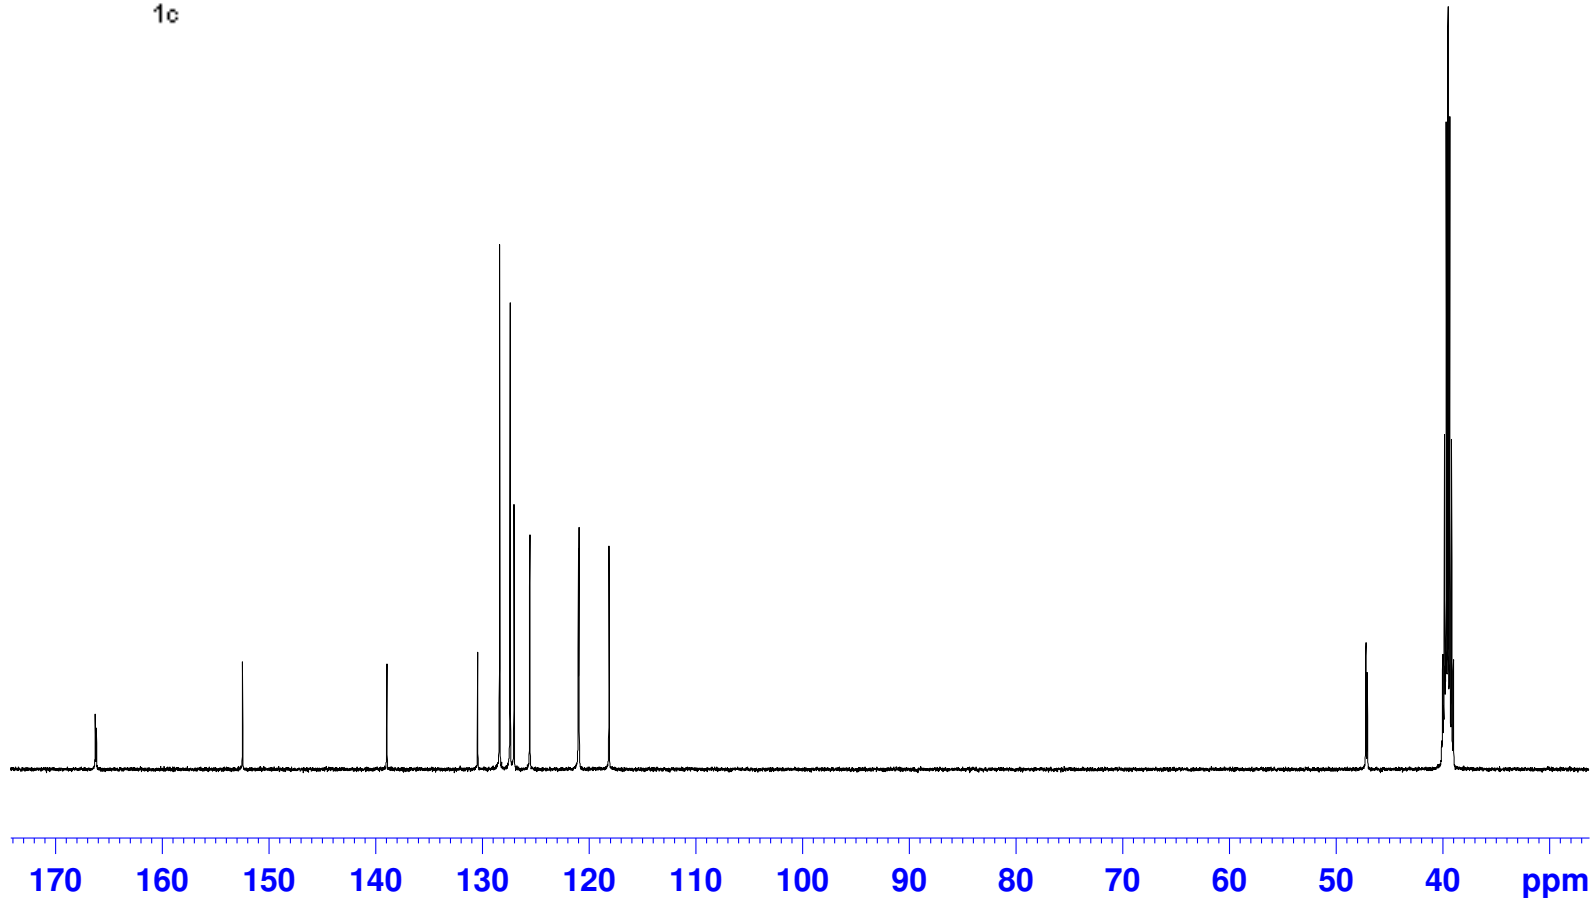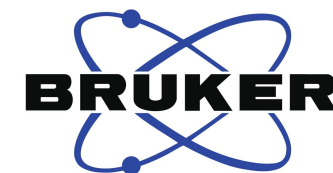

Current Data Parameters  
NAME Lifeng-1H  
EXPNO 126  
PROCNO 1

F2 - Acquisition Parameters  
Date\_ 20100729  
Time 4.40  
INSTRUM spect  
PROBHD 5 mm PABBO BB-  
PULPROG zgpg30  
TD 65536  
SOLVENT DMSO  
NS 1024  
DS 4  
SWH 29761.904 Hz  
FIDRES 0.454131 Hz  
AQ 1.1010548 sec  
RG 203  
DW 16.800 usec  
DE 6.50 usec  
TE 300.6 K  
D1 2.00000000 sec  
D11 0.03000000 sec  
TD0 1

==== CHANNEL f1 =====  
NUC1 13C  
P1 9.60 usec  
PL1 -1.00 dB  
PL1W 125.85865021 W  
SFO1 125.7452168 MHz

==== CHANNEL f2 =====  
CPDPRG2 waltz16  
NUC2 1H  
PCPD2 80.00 usec  
PL2 1.10 dB  
PL12 17.95 dB  
PL13 17.95 dB  
PL2W 16.96364784 W  
PL12W 0.35036376 W  
PL13W 0.35036376 W  
SFO2 500.0320001 MHz

F2 - Processing parameters  
SI 32768  
SF 125.7327077 MHz  
WDW EM  
SSB 0  
LB 1.00 Hz  
GB 0  
PC 1.40

N-(4-methylbenzyl)benzo[d]thiazol-2-amine  
PROTON CDC13

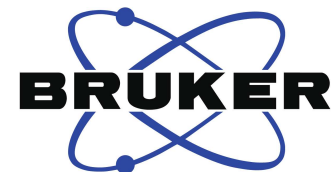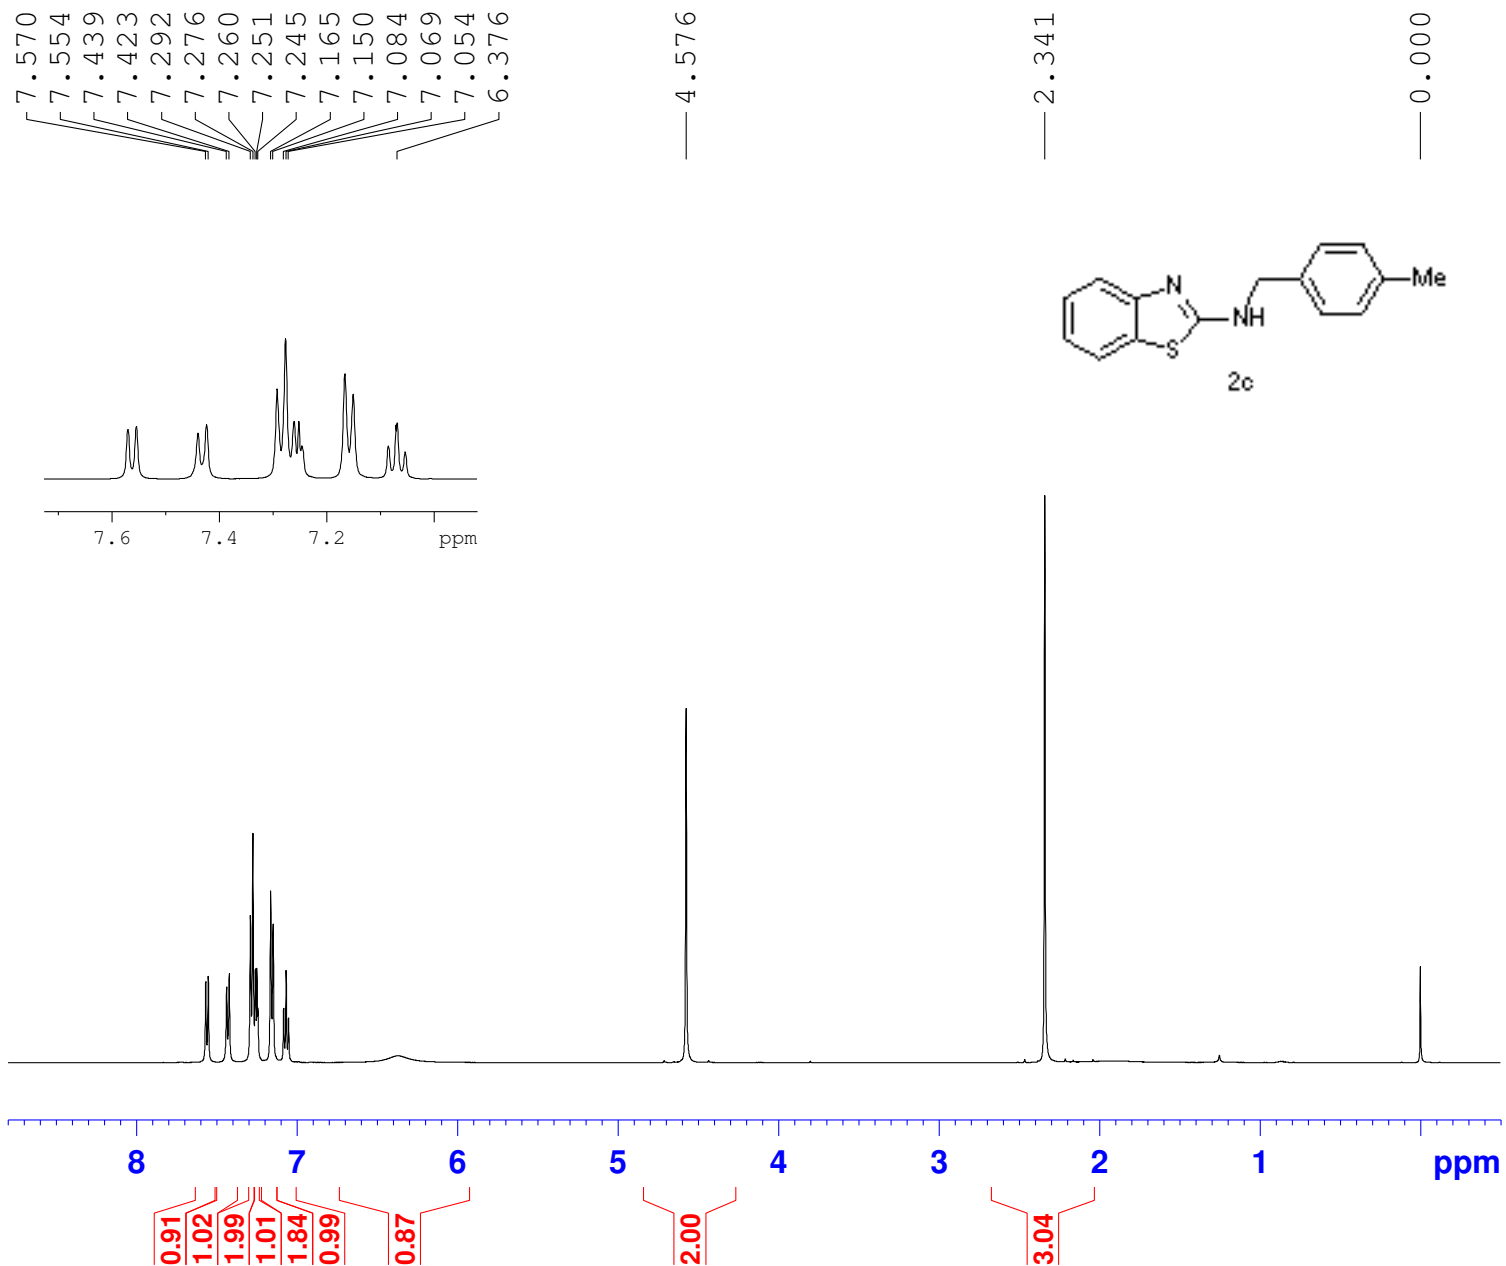

Current Data Parameters  
NAME Lifeng-1H  
EXPNO 99  
PROCNO 1

F2 - Acquisition Parameters  
Date\_ 20100708  
Time 1.48  
INSTRUM spect  
PROBHD 5 mm PABBO BB-  
PULPROG zg30  
TD 65536  
SOLVENT CDCl3  
NS 16  
DS 2  
SWH 10330.578 Hz  
FIDRES 0.157632 Hz  
AQ 3.1719923 sec  
RG 101  
DW 48.400 usec  
DE 6.50 usec  
TE 295.6 K  
D1 1.00000000 sec  
TD0 1

==== CHANNEL f1 =====  
NUC1 1H  
P1 11.50 usec  
PL1 1.10 dB  
PL1W 16.96364784 W  
SFO1 500.0330879 MHz

F2 - Processing parameters  
SI 32768  
SF 500.0300155 MHz  
WDW EM  
SSB 0  
LB 0.30 Hz  
GB 0  
PC 1.00

N-(4-methylbenzyl)benzo[d]thiazol-2-amine  
C13CPD CDC13

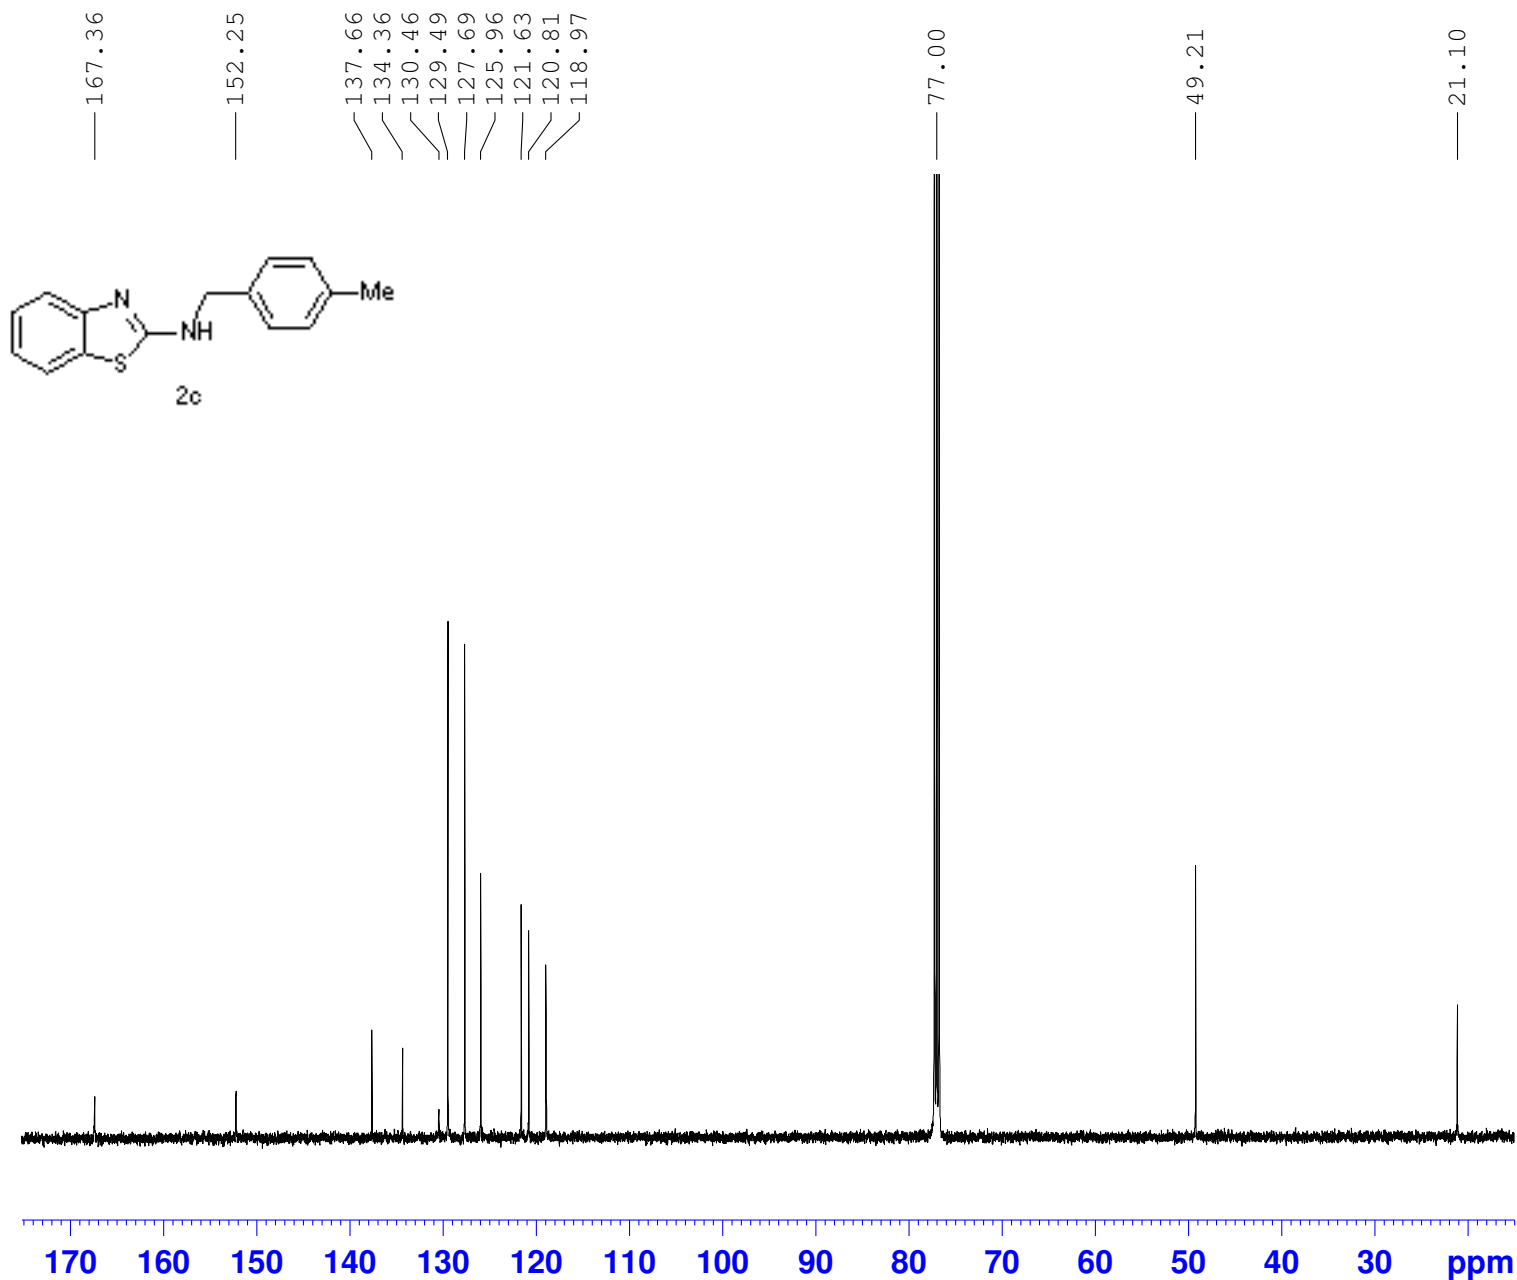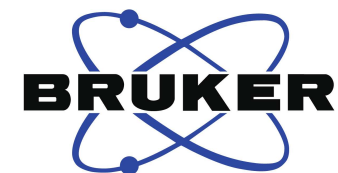

Current Data Parameters  
NAME Lifeng-1H  
EXPNO 100  
PROCNO 1

F2 - Acquisition Parameters  
Date\_ 20100708  
Time 3.49  
INSTRUM spect  
PROBHD 5 mm PABBO BB-  
PULPROG zgpg30  
TD 65536  
SOLVENT CDC13  
NS 2048  
DS 4  
SWH 29761.904 Hz  
FIDRES 0.454131 Hz  
AQ 1.1010548 sec  
RG 203  
DW 16.800 usec  
DE 6.50 usec  
TE 297.7 K  
D1 2.00000000 sec  
D11 0.03000000 sec  
TD0 1

==== CHANNEL f1 =====  
NUC1 13C  
P1 9.60 usec  
PL1 -1.00 dB  
PL1W 125.85865021 W  
SFO1 125.7452168 MHz

==== CHANNEL f2 =====  
CPDPRG2 waltz16  
NUC2 1H  
PCPD2 80.00 usec  
PL2 1.10 dB  
PL12 17.95 dB  
PL13 17.95 dB  
PL2W 16.96364784 W  
PL12W 0.35036376 W  
PL13W 0.35036376 W  
SFO2 500.0320001 MHz

F2 - Processing parameters  
SI 32768  
SF 125.7326440 MHz  
WDW EM  
SSB 0  
LB 1.00 Hz  
GB 0  
PC 1.40

N-(4-methoxybenzyl)benzo[d]thiazol-2-amine  
PROTON CDCL<sub>3</sub>

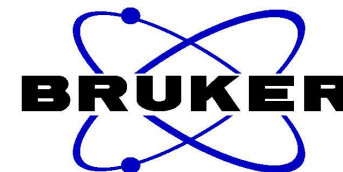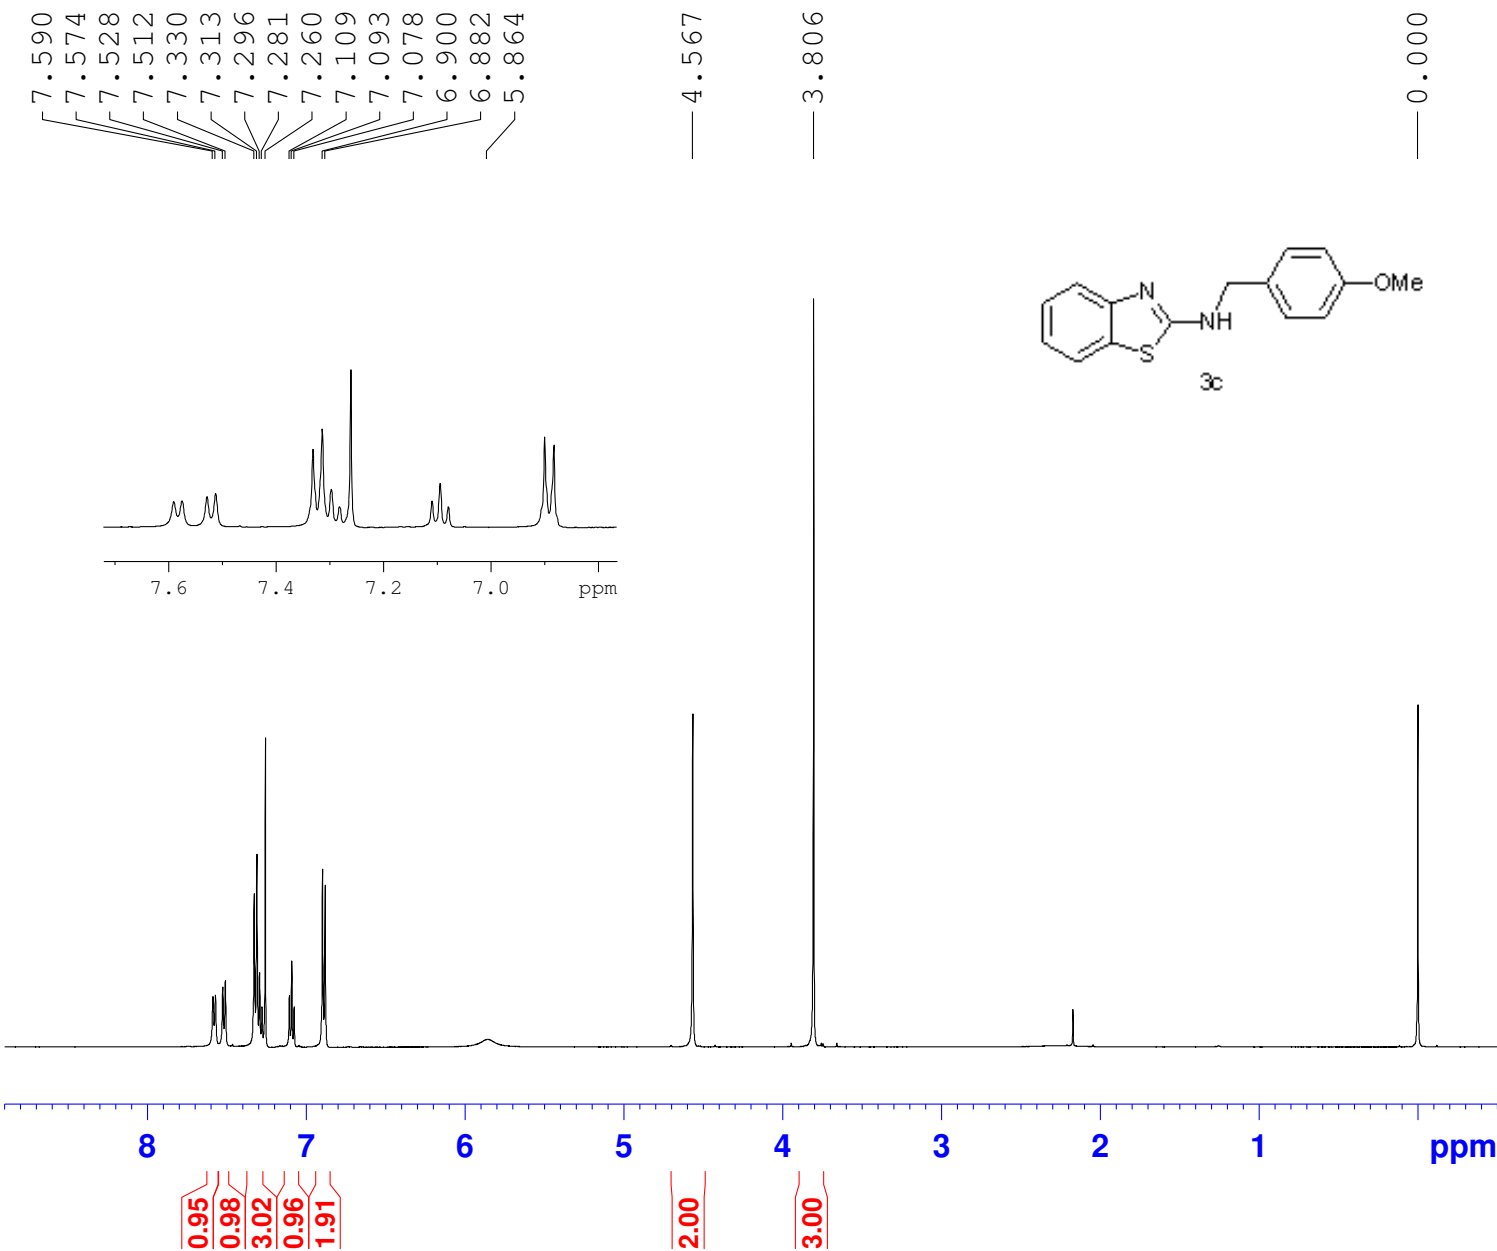

NAME 600-700  
EXPNO 100  
PROCNO 1  
Date\_ 20110302  
Time 13.40  
INSTRUM spect  
PROBHD 5 mm PABBO BB-  
PULPROG zg30  
TD 65536  
SOLVENT CDCl3  
NS 16  
DS 2  
SWH 10330.578 Hz  
FIDRES 0.157632 Hz  
AQ 3.1719923 sec  
RG 181  
DW 48.400 usec  
DE 6.50 usec  
TE 294.0 K  
D1 1.00000000 sec

===== CHANNEL f1 =====  
NUC1 1H  
P1 11.50 usec  
SI 32768  
SF 500.0300117 MHz  
WDW EM  
SSB 0  
LB 0.30 Hz  
GB 0  
PC 1.00

N-(4-methoxybenzo[d]thiazol-2-amine)  
C13CPD CDC13

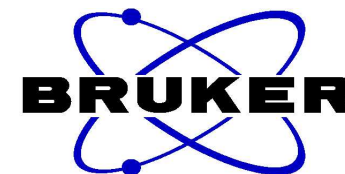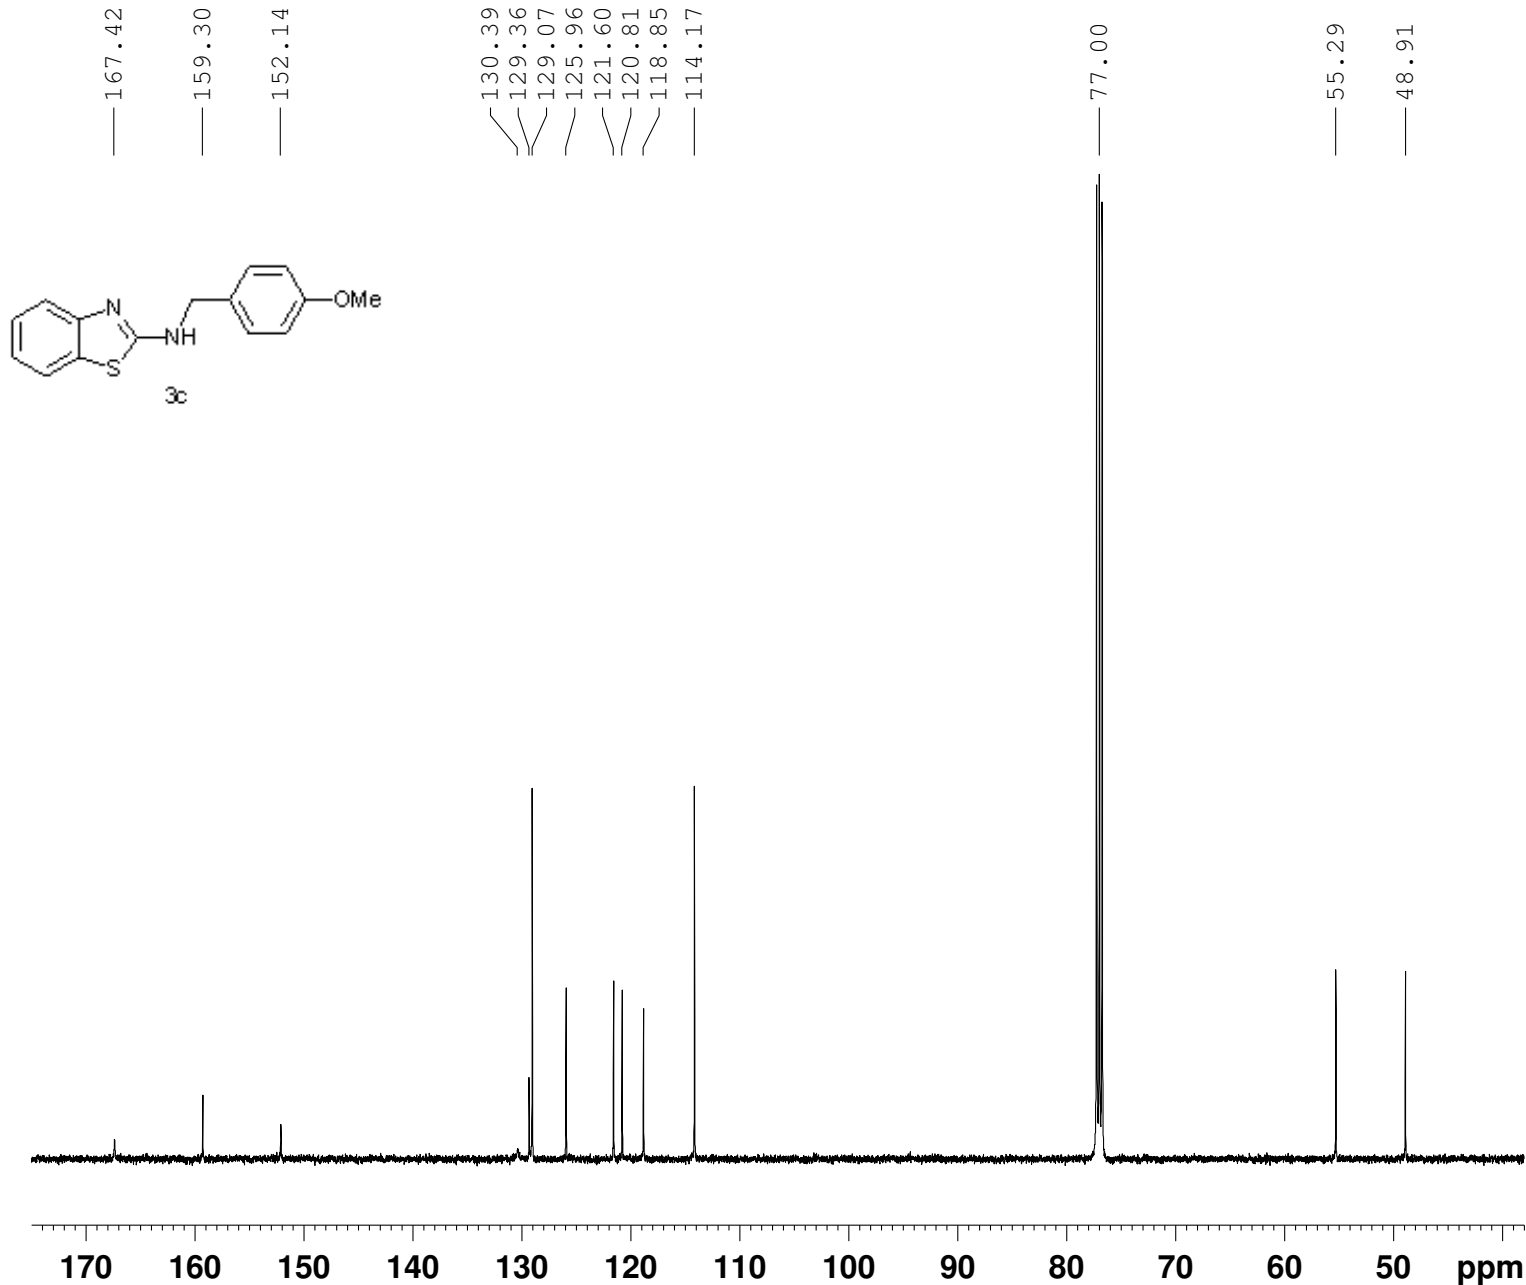

Current Data Parameters  
NAME Lifeng-13C  
EXPNO 660  
PROCNO 1

F2 - Acquisition Parameters  
Date\_ 20110301  
Time 13.50  
INSTRUM spect  
PROBHD 5 mm PABBO BB-  
PULPROG zgpg30  
TD 65536  
SOLVENT CDC13  
NS 2048  
DS 4  
SWH 29761.904 Hz  
FIDRES 0.454131 Hz  
AQ 1.1010548 sec  
RG 203  
DW 16.800 usec  
DE 6.50 usec  
TE 295.6 K  
D1 2.00000000 sec  
D11 0.03000000 sec

==== CHANNEL f1 =====  
NUC1 13C  
P1 9.60 usec  
PLW1 125.86000061 W  
SFO1 125.7452168 MHz

==== CHANNEL f2 =====  
CPDPRG2 waltz16  
NUC2 1H  
PCPD2 80.00 usec  
PLW2 16.96400070 W  
PLW12 0.35054001 W  
PLW13 0.22434001 W  
SFO2 500.0320001 MHz

F2 - Processing parameters  
SI 32768  
SF 125.7327685 MHz  
WDW EM  
SSB 0  
LB 1.00 Hz  
GB 0  
PC 1.40

N-(4-fluorobenzyl)benzo[d]thiazol-2-amine  
PROTON CDC13

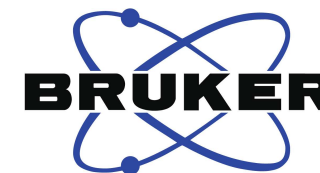

7.585  
7.569  
7.449  
7.433  
7.382  
7.371  
7.366  
7.355  
7.294  
7.279  
7.263  
7.256  
7.106  
7.090  
7.075  
7.052  
7.035  
7.018  
6.435

4.603

0.000

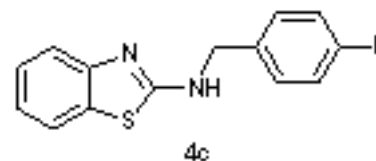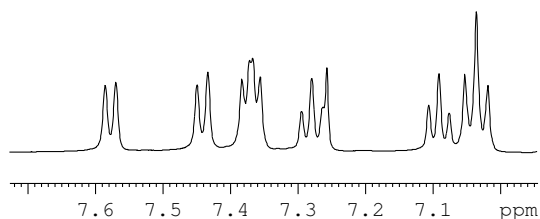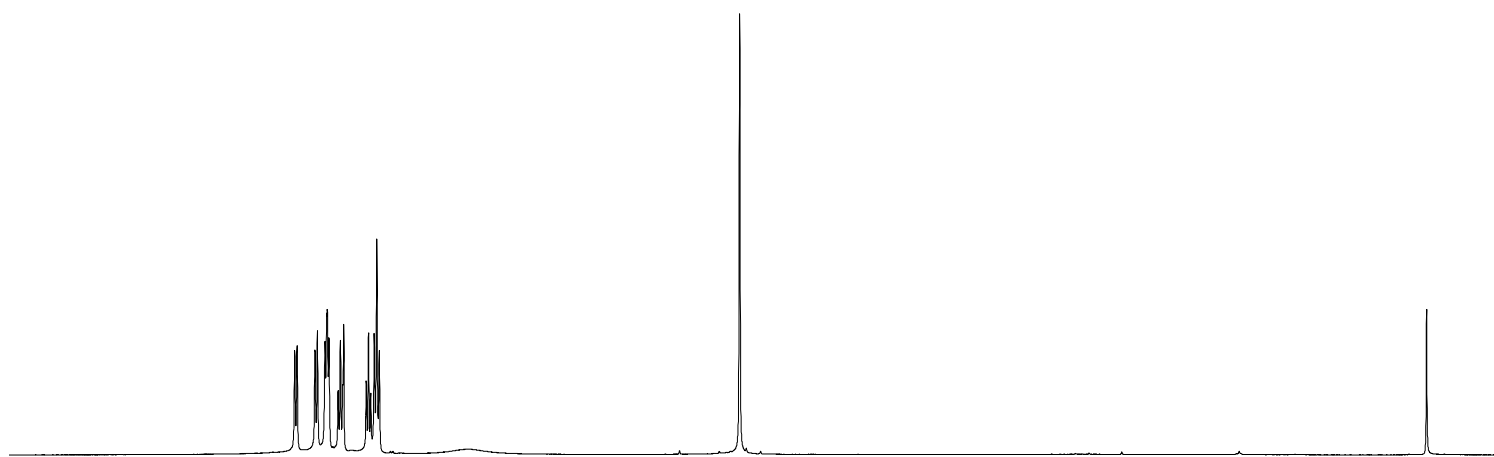

9 8 7 6 5 4 3 2 1 ppm

1.00  
1.09  
1.92  
1.41  
1.03  
1.77  
0.87

2.00

Current Data Parameters  
NAME Lifeng-1H  
EXPNO 584  
PROCNO 1

F2 - Acquisition Parameters  
Date\_ 20101121  
Time 0.03  
INSTRUM spect  
PROBHD 5 mm PABBO BB-  
PULPROG zg30  
TD 65536  
SOLVENT CDC13  
NS 16  
DS 2  
SWH 10330.578 Hz  
FIDRES 0.157632 Hz  
AQ 3.1719923 sec  
RG 64  
DW 48.400 usec  
DE 6.50 usec  
TE 294.4 K  
D1 1.0000000 sec  
TD0 1

==== CHANNEL f1 =====  
NUC1 1H  
P1 11.50 usec  
PL1 1.10 dB  
PL1W 16.96364784 W  
SFO1 500.0330879 MHz

F2 - Processing parameters  
SI 32768  
SF 500.0300139 MHz  
WDW EM  
SSB 0  
LB 0.30 Hz  
GB 0  
PC 1.00



N-(4-fluorobenzyl)benzo[d]thiazol-2-amine  
C13CPD CDC13

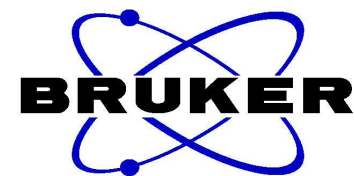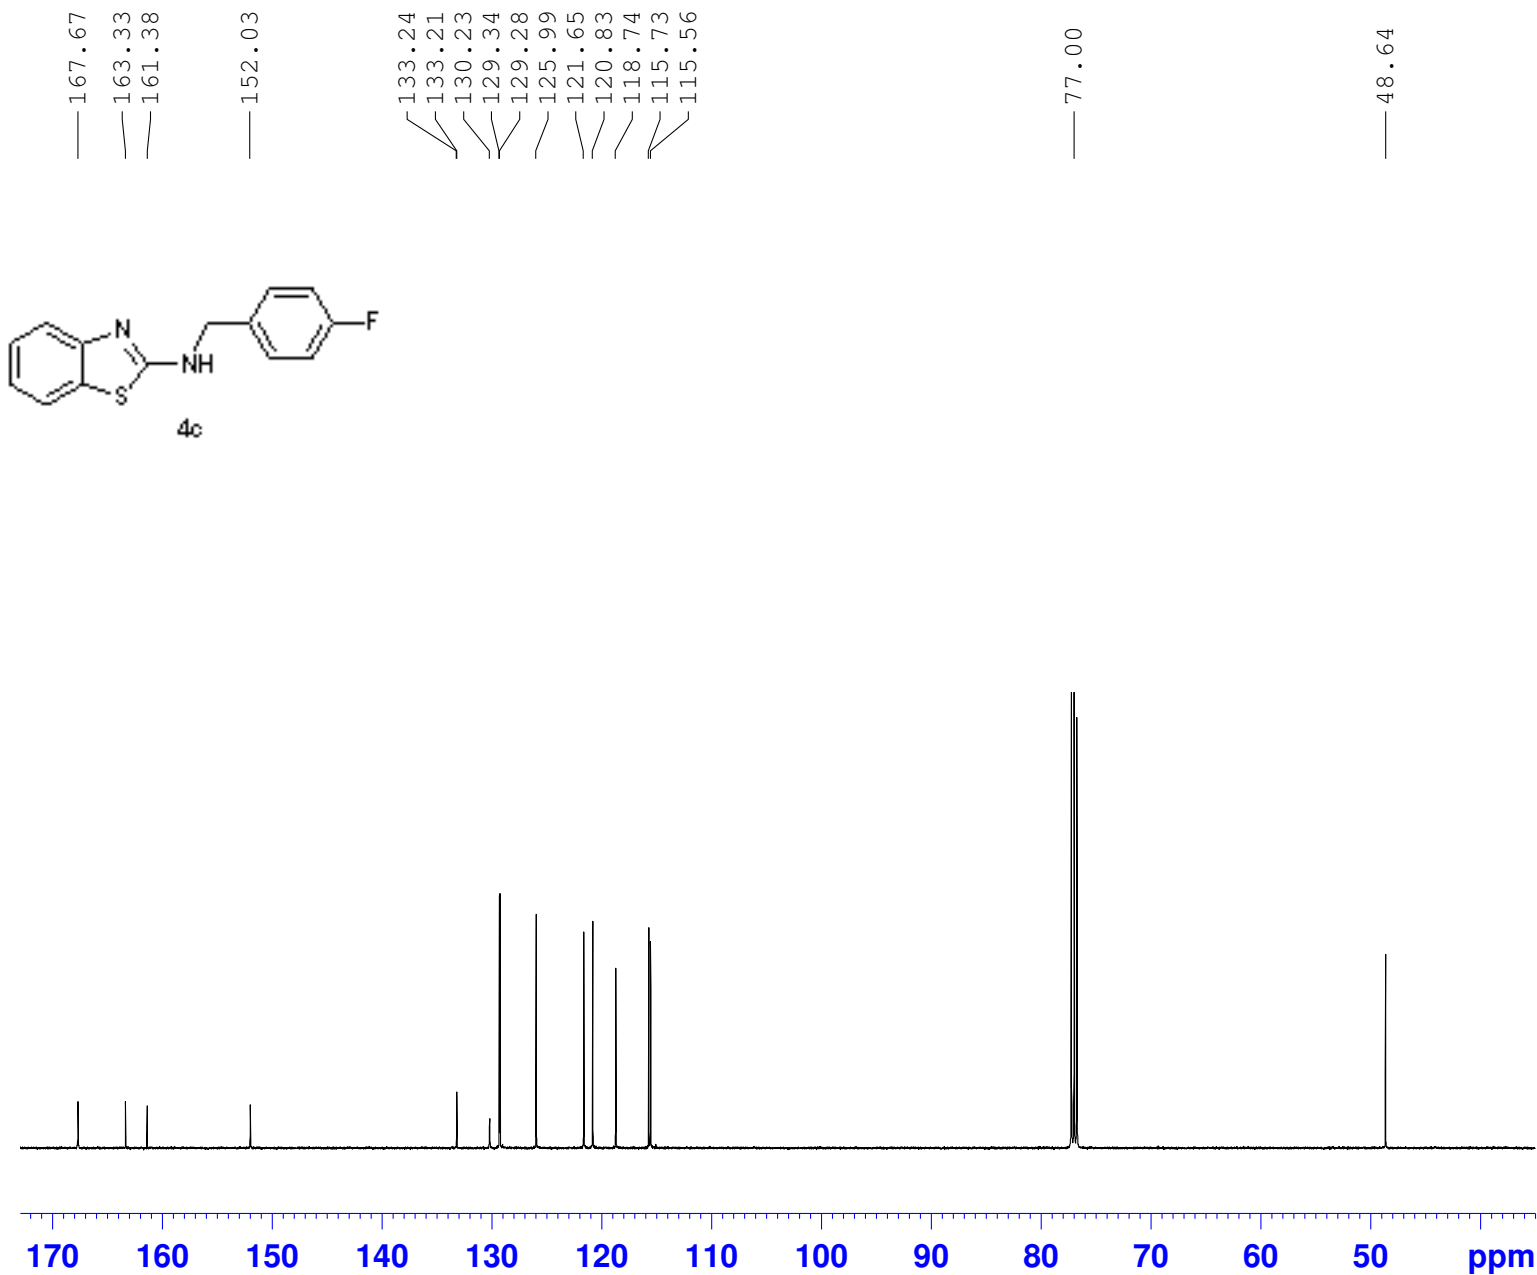

NAME 3  
EXPNO 610  
PROCNO 1  
Date\_ 20101229  
Time 20.07  
INSTRUM spect  
PROBHD 5 mm PABBO BB-  
PULPROG zgpg30  
TD 65536  
SOLVENT DMSO  
NS 1868  
DS 4  
SWH 29761.904 Hz  
FIDRES 0.454131 Hz  
AQ 1.1010548 sec  
RG 203  
DW 16.800 usec  
DE 6.50 usec  
TE 296.7 K  
D1 2.00000000 sec  
D11 0.03000000 sec

==== CHANNEL f1 =====  
NUC1 13C  
P1 9.60 usec  
SI 32768  
SF 125.7320527 MHz  
WDW EM  
SSB 0  
LB 1.00 Hz  
GB 0  
PC 1.40

N-(4-chlorobenzyl)benzo[d]thiazol-2-amine  
PROTON DMSO-d<sub>6</sub>

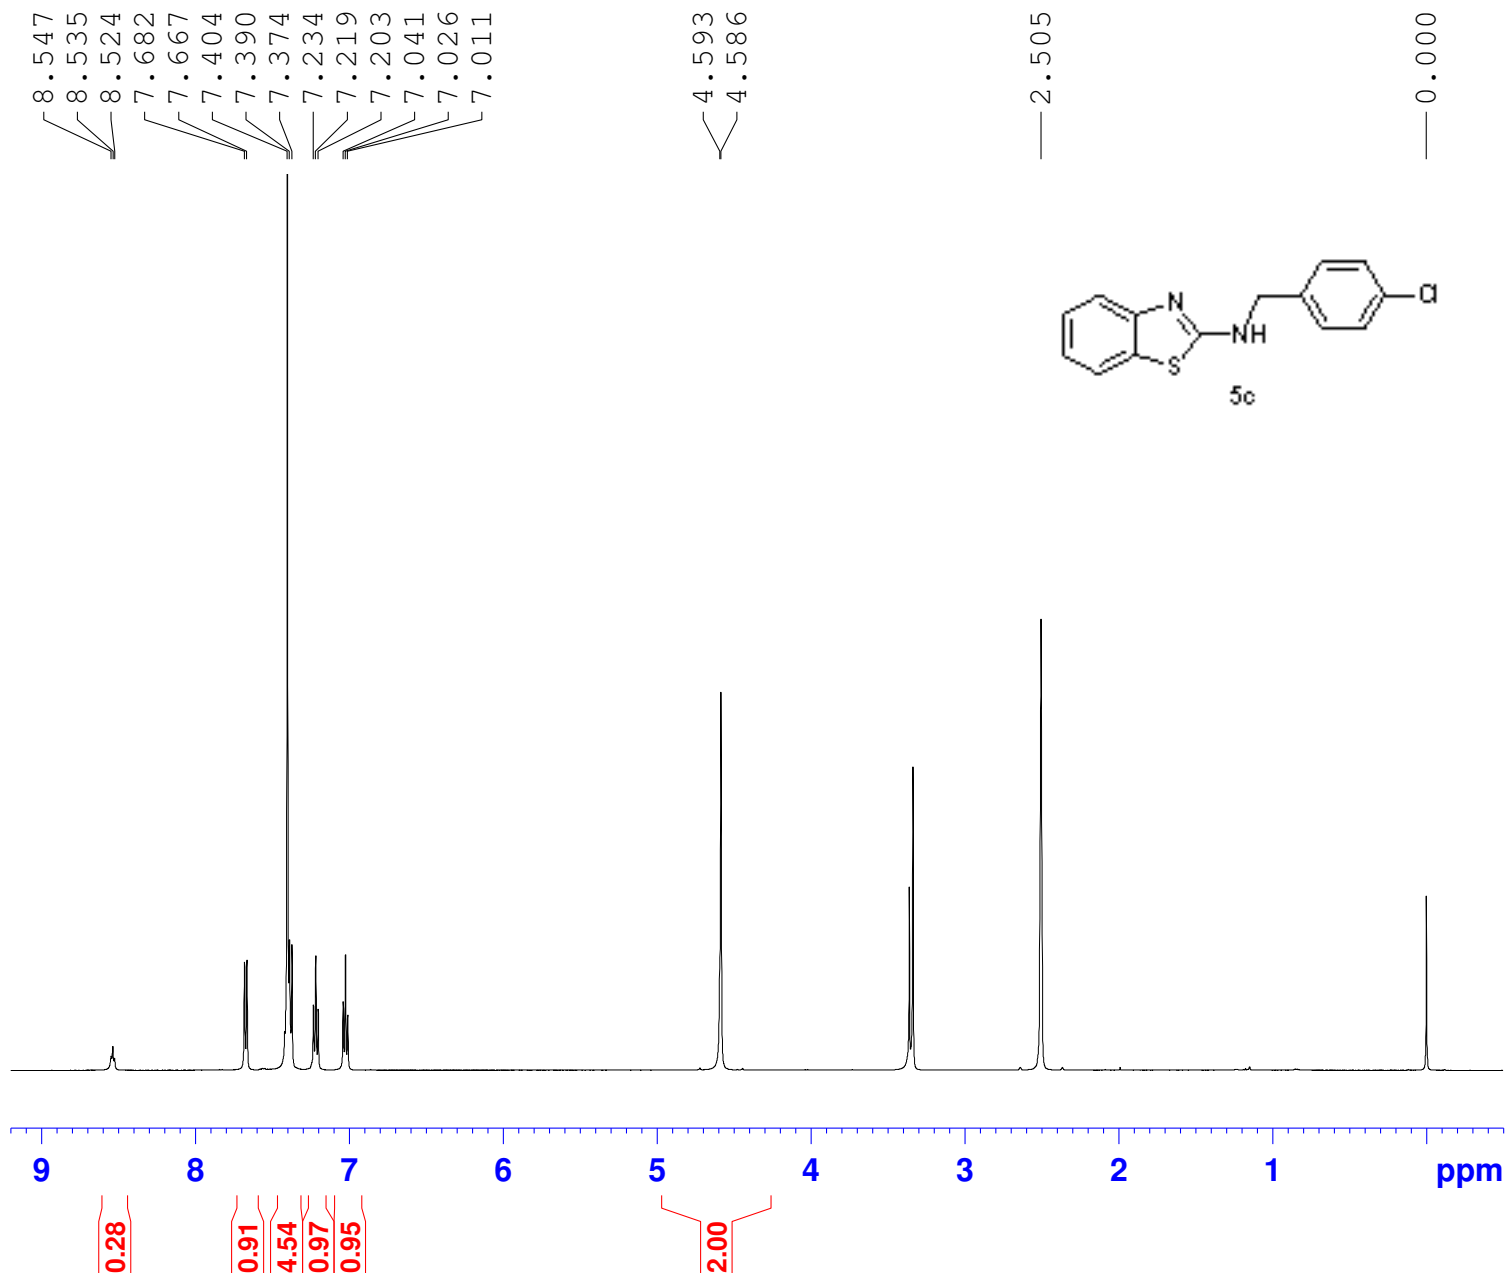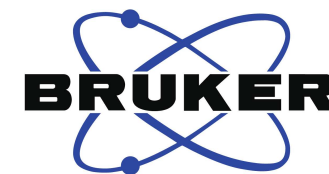

Current Data Parameters  
NAME Lifeng-1H  
EXPNO 101  
PROCNO 1

F2 - Acquisition Parameters  
Date\_ 20100708  
Time 4.40  
INSTRUM spect  
PROBHD 5 mm PABBO BB-  
PULPROG zg30  
TD 65536  
SOLVENT CDCl3  
NS 16  
DS 2  
SWH 10330.578 Hz  
FIDRES 0.157632 Hz  
AQ 3.171923 sec  
RG 128  
DW 48.400 usec  
DE 6.50 usec  
TE 295.9 K  
D1 1.00000000 sec  
TD0 1

==== CHANNEL f1 =====  
NUC1 1H  
P1 11.50 usec  
PL1 1.10 dB  
PL1W 16.96364784 W  
SFO1 500.0330879 MHz

F2 - Processing parameters  
SI 32768  
SF 500.0323755 MHz  
WDW EM  
SSB 0  
LB 0.30 Hz  
GB 0  
PC 1.00

N-(4-chlorobenzyl)benzo[d]thiazol-2-amine  
C13CPD DMSO-d6

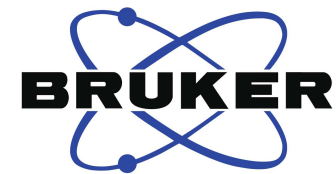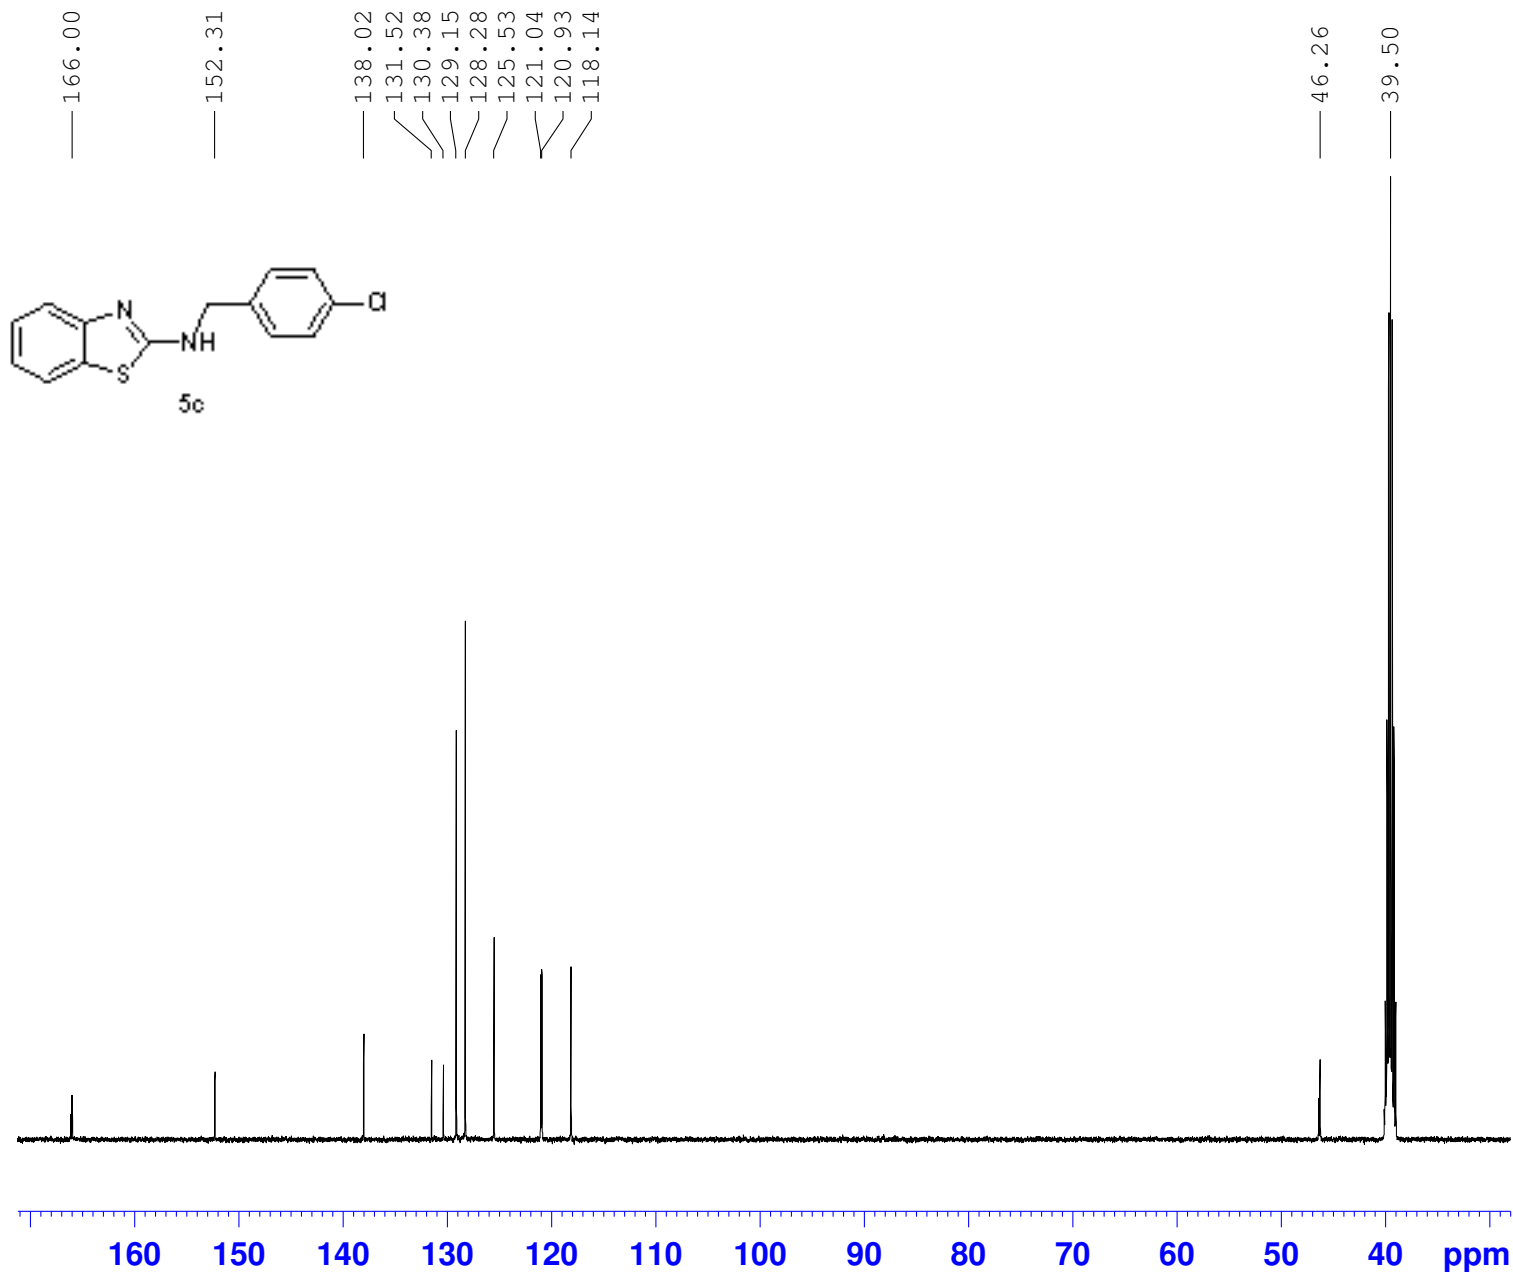

Current Data Parameters  
NAME Lifeng-1H  
EXPNO 102  
PROCNO 1

F2 - Acquisition Parameters  
Date\_ 20100708  
Time 18.05  
INSTRUM spect  
PROBHD 5 mm PABBO BB-  
PULPROG zgpg30  
TD 65536  
SOLVENT DMSO  
NS 1024  
DS 4  
SWH 29761.904 Hz  
FIDRES 0.454131 Hz  
AQ 1.1010548 sec  
RG 203  
DW 16.800 usec  
DE 6.50 usec  
TE 298.2 K  
D1 2.00000000 sec  
d11 0.03000000 sec  
DELTA 1.89999998 sec  
NUC1 13C  
P1 9.60 usec  
PLW1 -1.00000000 W  
SFO1 125.7452168 MHz  
CPDPRG2 waltz16  
NUC2 1H  
PCPD2 80.00 usec  
PLW2 -1.00000000 W  
PLW12 -1.00000000 W  
PLW13 -1.00000000 W  
SFO2 500.0320001 MHz

F2 - Processing parameters  
SI 32768  
SF 125.7327077 MHz  
WDW EM  
SSB 0  
LB 1.00 Hz  
GB 0  
PC 1.40

N-(2-chlorobenzyl)benzo[d]thiazol-2-amine  
PROTON DMSO-d6

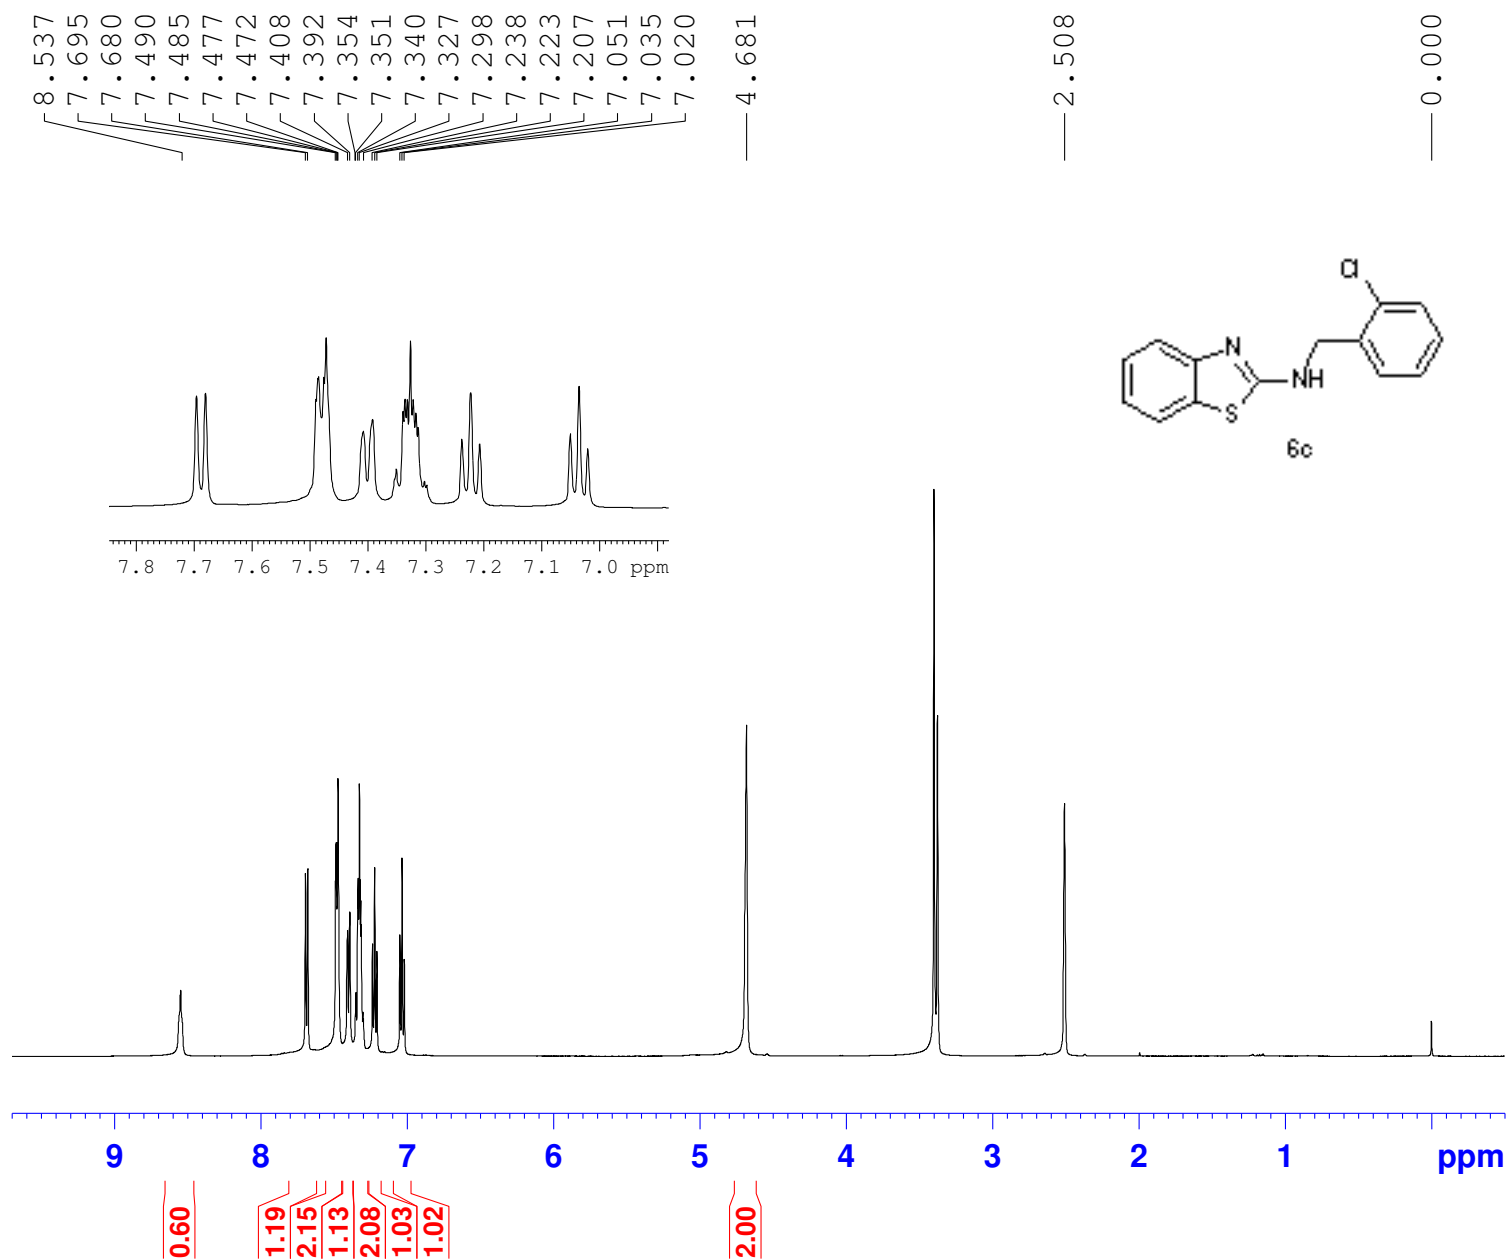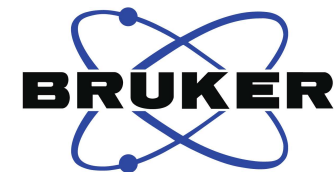

Current Data Parameters  
NAME Lifeng-1H  
EXPNO 107  
PROCNO 1

F2 - Acquisition Parameters  
Date\_ 20100708  
Time 16.10  
INSTRUM spect  
PROBHD 5 mm PABBO BB-  
PULPROG zg30  
TD 65536  
SOLVENT DMSO  
NS 16  
DS 2  
SWH 10330.578 Hz  
FIDRES 0.157632 Hz  
AQ 3.1719923 sec  
RG 50.8  
DW 48.400 usec  
DE 6.50 usec  
TE 295.4 K  
D1 1.00000000 sec  
TD0 1

===== CHANNEL f1 =====  
NUC1 1H  
P1 11.50 usec  
PL1 1.10 dB  
PL1W 16.96364784 W  
SFO1 500.0330879 MHz

F2 - Processing parameters  
SI 32768  
SF 500.0299986 MHz  
WDW EM  
SSB 0  
LB 0.30 Hz  
GB 0  
PC 1.00

N-(2-chlorobenzyl)benzo[d]thiazol-2-amine  
C13CPD DMSO-d6

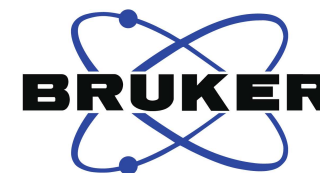

165.99  
152.30  
135.92  
132.34  
130.50  
129.26  
129.07  
128.89  
127.25  
125.56  
121.13  
120.98  
118.25

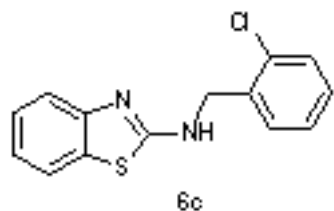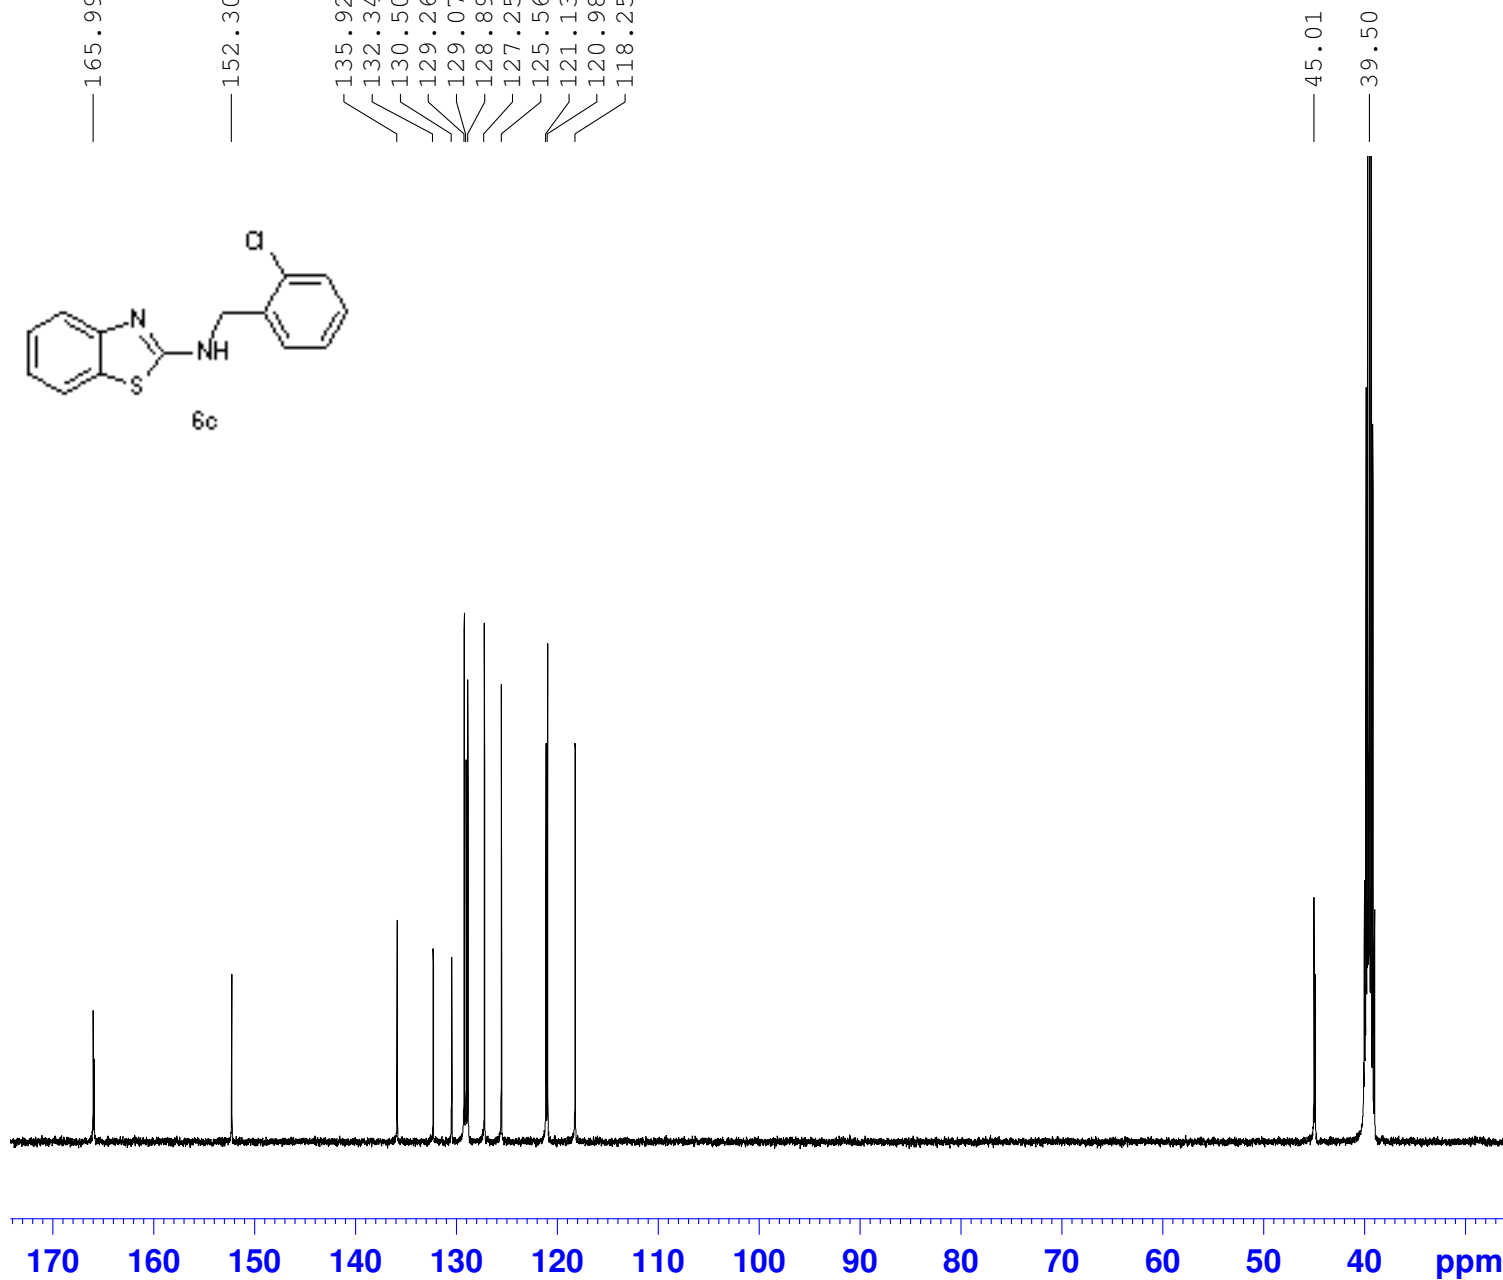

Current Data Parameters  
NAME Lifeng-1H  
EXPNO 109  
PROCNO 1

F2 - Acquisition Parameters  
Date\_ 20100708  
Time 17.07  
INSTRUM spect  
PROBHD 5 mm PABBO BB-  
PULPROG zgpg30  
TD 65536  
SOLVENT DMSO  
NS 1024  
DS 4  
SWH 29761.904 Hz  
FIDRES 0.454131 Hz  
AQ 1.1010548 sec  
RG 203  
DW 16.800 usec  
DE 6.50 usec  
TE 297.7 K  
D1 2.0000000 sec  
D11 0.03000000 sec  
TD0 1

=====  
CHANNEL f1  
NUC1 13C  
P1 9.60 usec  
PL1 -1.00 dB  
PL1W 125.85865021 W  
SFO1 125.7452168 MHz

=====  
CHANNEL f2  
CPDPRG2 waltz16  
NUC2 1H  
PCPD2 80.00 usec  
PL2 1.10 dB  
PL12 17.95 dB  
PL13 17.95 dB  
PL2W 16.96364784 W  
PL12W 0.35036376 W  
PL13W 0.35036376 W  
SFO2 500.0320001 MHz

F2 - Processing parameters  
SI 32768  
SF 125.7327039 MHz  
WDW EM  
SSB 0  
LB 1.00 Hz  
GB 0  
PC 1.40

N-(4-bromobenzyl)benzo[d]thiazol-2-amine  
PROTON DMSO-d<sub>6</sub>

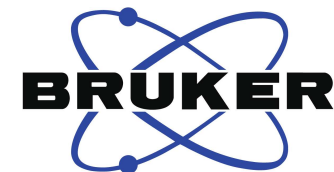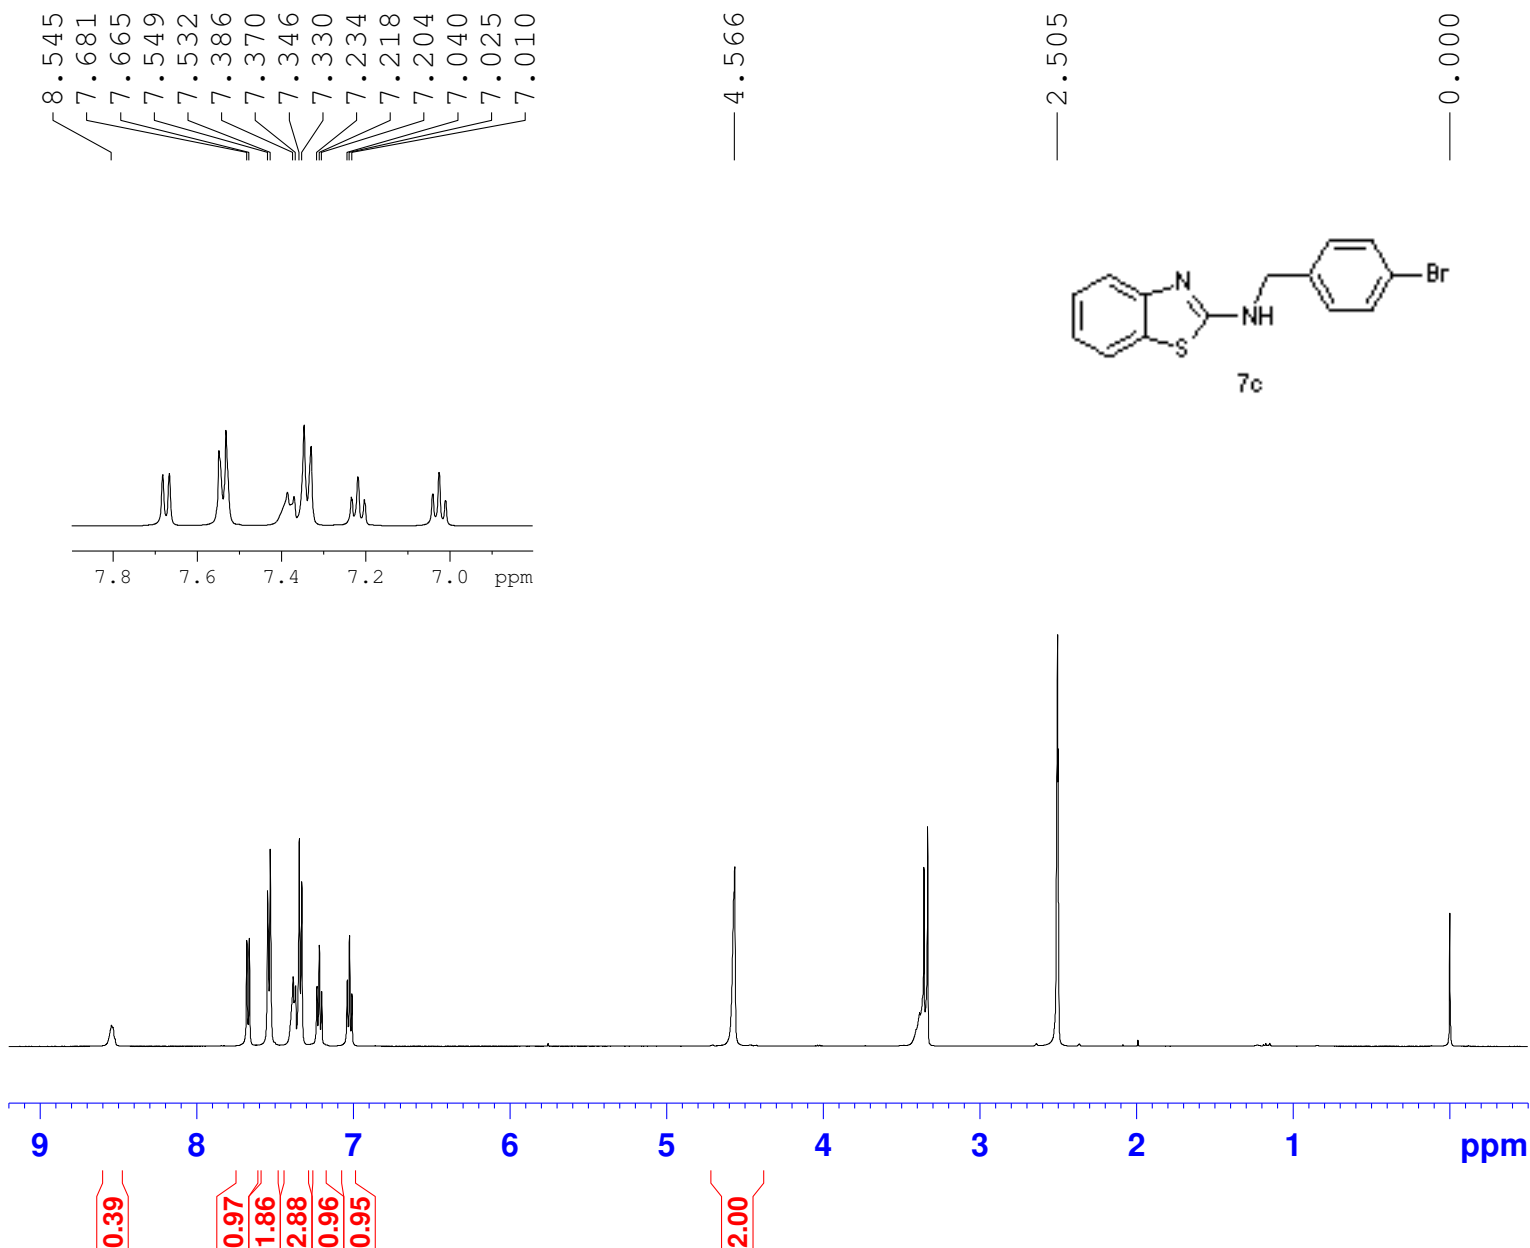

Current Data Parameters  
NAME Lifeng-1H  
EXPNO 103  
PROCNO 1

F2 - Acquisition Parameters  
Date\_ 20100708  
Time 5.04  
INSTRUM spect  
PROBHD 5 mm PABBO BB-  
PULPROG zg30  
TD 65536  
SOLVENT DMSO  
NS 16  
DS 2  
SWH 10330.578 Hz  
FIDRES 0.157632 Hz  
AQ 3.1719923 sec  
RG 71.8  
DW 48.400 usec  
DE 6.50 usec  
TE 296.0 K  
D1 1.00000000 sec  
TD0 1

==== CHANNEL f1 =====  
NUC1 1H  
P1 11.50 usec  
PL1 1.10 dB  
PL1W 16.96364784 W  
SF01 500.0330879 MHz

F2 - Processing parameters  
SI 32768  
SF 500.0300006 MHz  
WDW EM  
SSB 0  
LB 0.30 Hz  
GB 0  
PC 1.00

N-(4-bromobenzyl)benzo[d]thiazol-2-amine  
C13CPD DMSO-d6

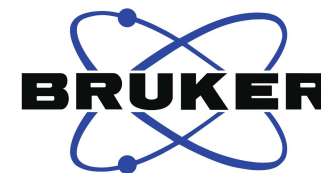

165.97  
152.30  
138.44  
131.18  
130.37  
129.49  
125.52  
121.04  
120.91  
119.96  
118.14

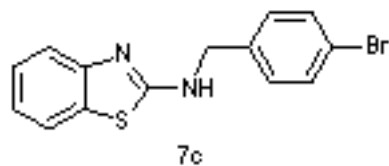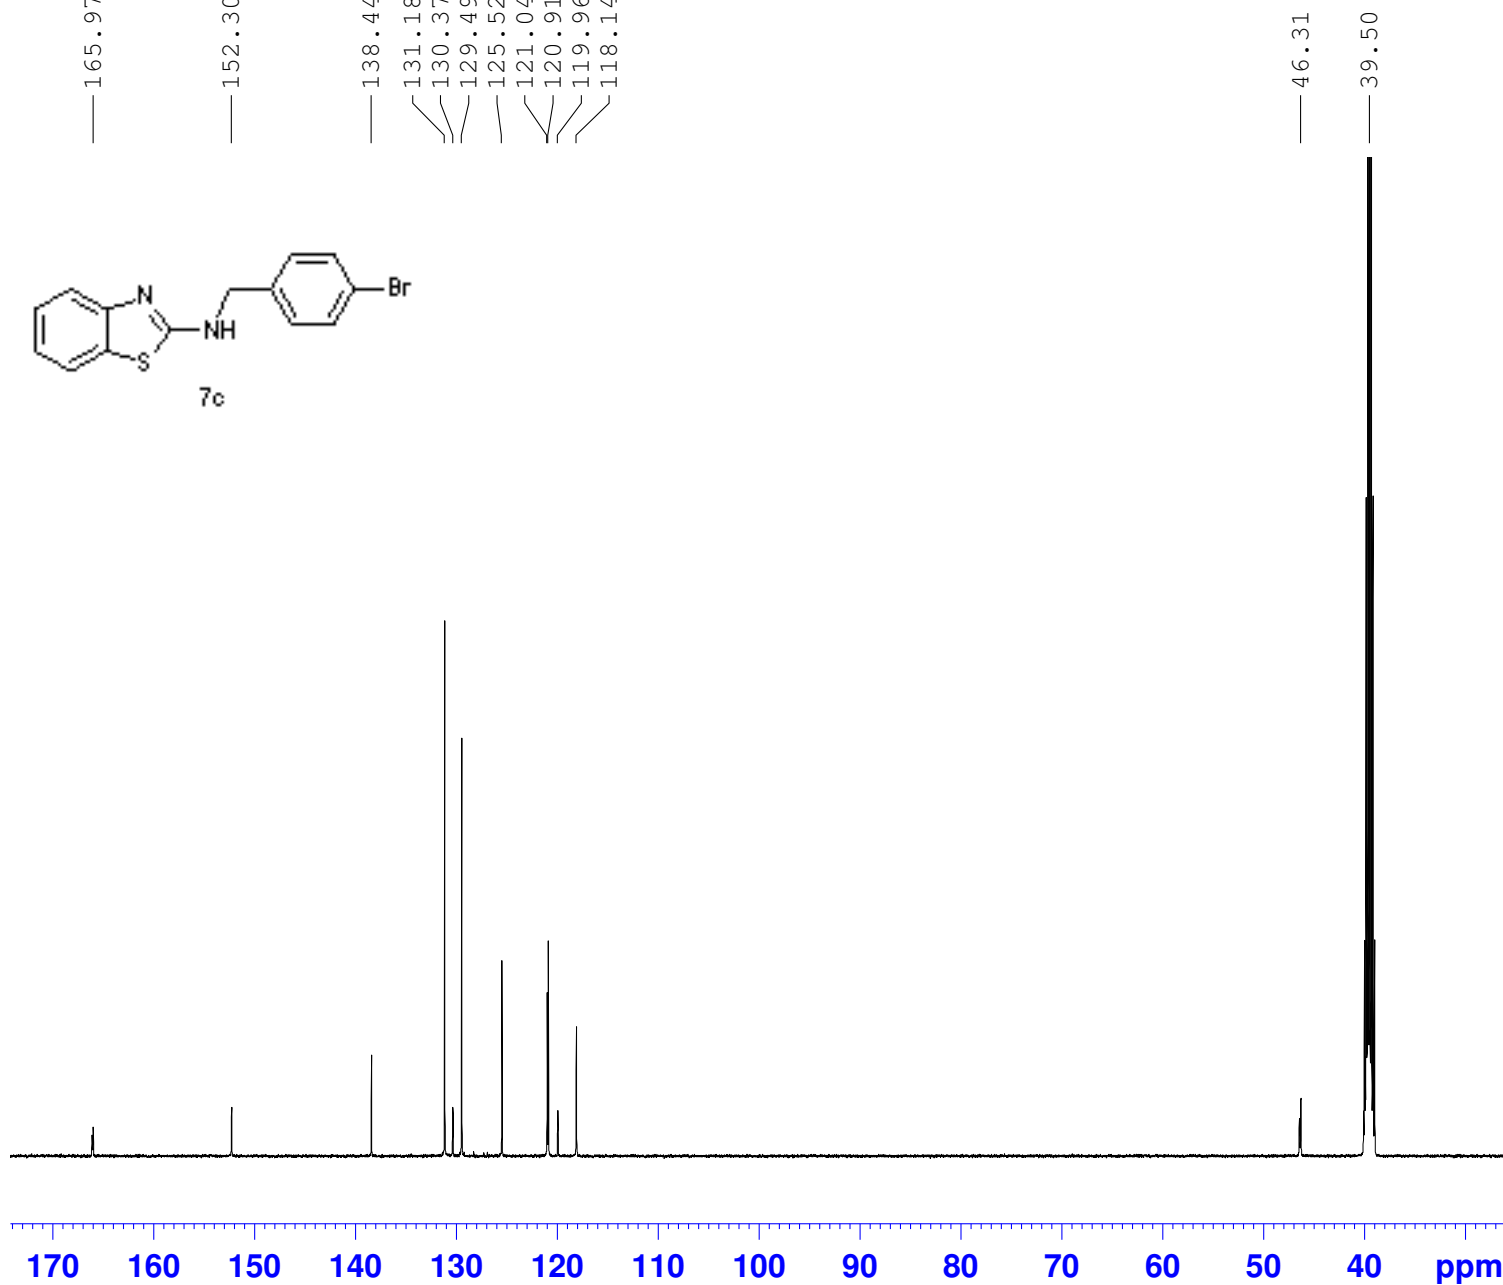

Current Data Parameters  
NAME Lifeng-1H  
EXPNO 104  
PROCNO 1

F2 - Acquisition Parameters  
Date\_ 20100708  
Time 10.38  
INSTRUM spect  
PROBHD 5 mm PABBO BB-  
PULPROG zgpg30  
TD 65536  
SOLVENT DMSO  
NS 6144  
DS 4  
SWH 29761.904 Hz  
FIDRES 0.454131 Hz  
AQ 1.1010548 sec  
RG 203  
DW 16.800 usec  
DE 6.50 usec  
TE 297.6 K  
D1 2.0000000 sec  
D11 0.03000000 sec  
TD0 1

==== CHANNEL f1 =====  
NUC1 13C  
P1 9.60 usec  
PL1 -1.00 dB  
PL1W 125.85865021 W  
SFO1 125.7452168 MHz

==== CHANNEL f2 =====  
CPDPRG2 waltz16  
NUC2 1H  
PCPD2 80.00 usec  
PL2 1.10 dB  
PL12 17.95 dB  
PL13 17.95 dB  
PL2W 16.96364784 W  
PL12W 0.35036376 W  
PL13W 0.35036376 W  
SFO2 500.0320001 MHz

F2 - Processing parameters  
SI 32768  
SF 125.7327104 MHz  
WDW EM  
SSB 0  
LB 1.00 Hz  
GB 0  
PC 1.40

N-(4-(trifluoromethyl)benyl)benzo[d]thiazol-2-amine  
PROTON DMSO-d<sub>6</sub>

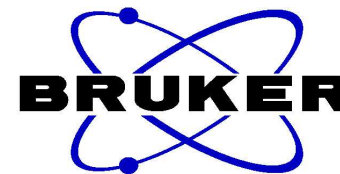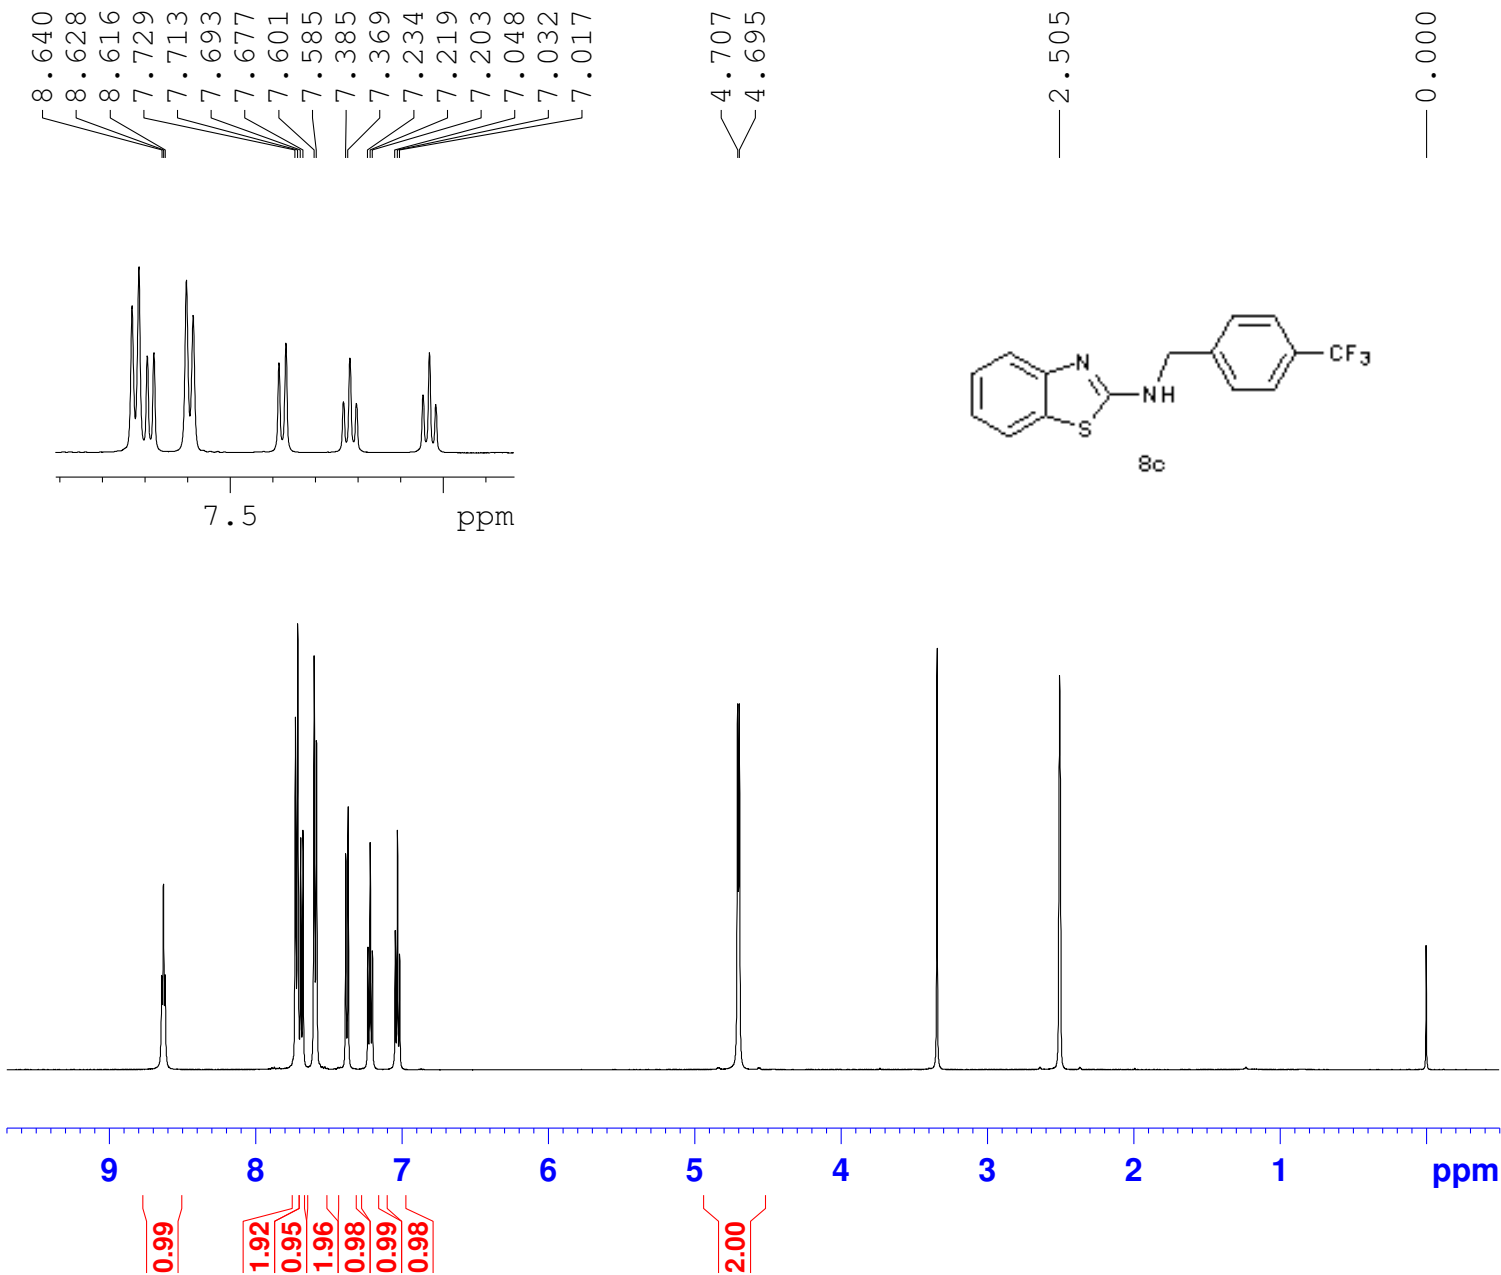

NAME Shx-1  
EXPNO 570  
PROCNO 1  
Date\_ 20101121  
Time 1.08  
INSTRUM spect  
PROBHD 5 mm PABBO BB-  
PULPROG zg30  
TD 65536  
SOLVENT DMSO  
NS 16  
DS 2  
SWH 10330.578 Hz  
FIDRES 0.157632 Hz  
AQ 3.1719923 sec  
RG 64  
DW 48.400 usec  
DE 6.50 usec  
TE 294.5 K  
D1 1.00000000 sec  
TD0 1

==== CHANNEL f1 =====  
NUC1 1H  
P1 11.50 usec  
PL1 1.10 dB  
PL1W 16.96364784 W  
SFO1 500.0330879 MHz  
SI 32768  
SF 500.0300000 MHz  
WDW EM  
SSB 0  
LB 0.30 Hz  
GB 0  
PC 1.00



N-(4-(trifluoromethyl)benzyl)benzo[d]thiazol-2-amine  
C13CPD DMSO-d6

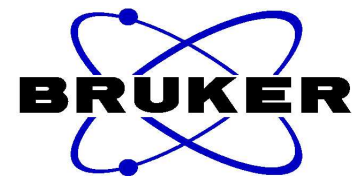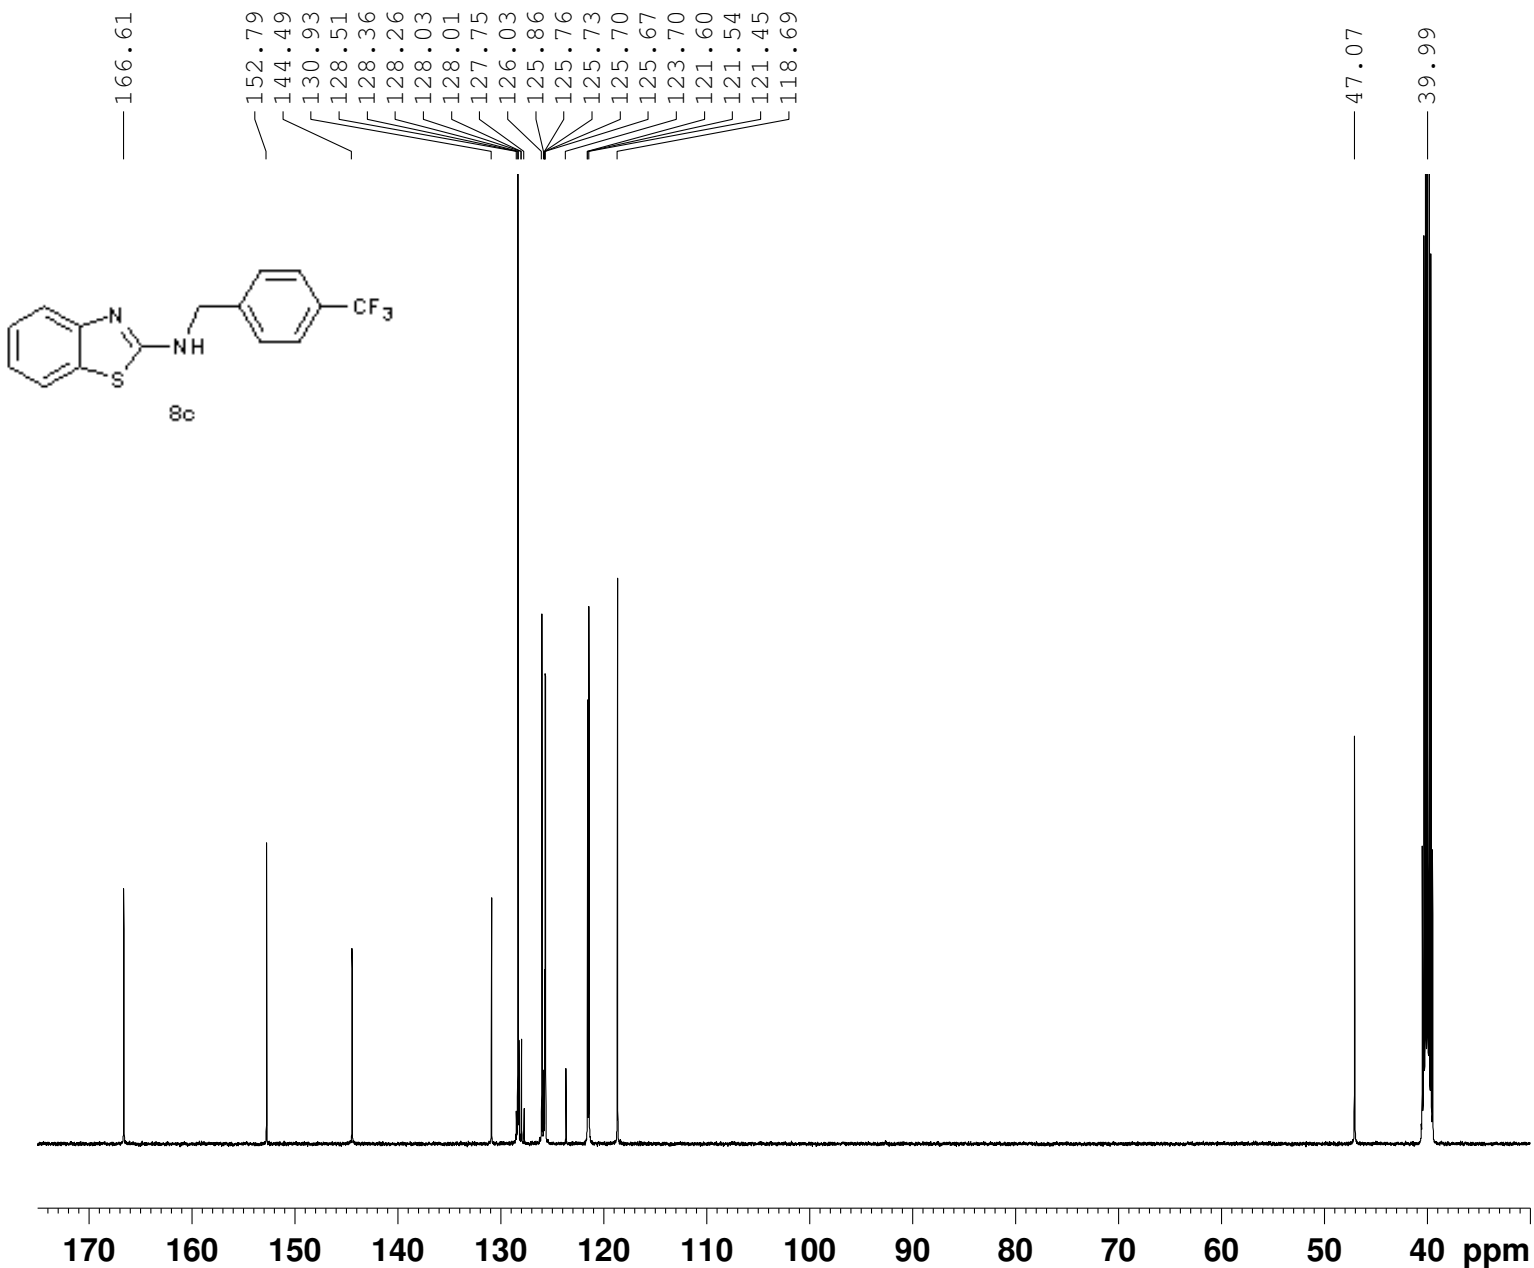

NAME Shx-1  
EXPNO 577  
PROCNO 1  
Date\_ 20101122  
Time 4.41  
INSTRUM spect  
PROBHD 5 mm PABBO BB-  
PULPROG zgpg30  
TD 65536  
SOLVENT DMSO  
NS 4287  
DS 4  
SWH 29761.904 Hz  
FIDRES 0.454131 Hz  
AQ 1.1010548 sec  
RG 203  
DW 16.800 usec  
DE 6.50 usec  
TE 296.8 K  
D1 2.00000000 sec  
D11 0.03000000 sec  
TD0 1

==== CHANNEL f1 =====  
NUC1 13C  
P1 9.60 usec  
PL1 -1.00 dB  
PL1W 125.85865021 W  
SFO1 125.7452168 MHz

==== CHANNEL f2 =====  
CPDPRG2 waltz16  
NUC2 1H  
PCPD2 80.00 usec  
PL2 1.10 dB  
PL12 17.95 dB  
PL13 17.95 dB  
PL2W 16.96364784 W  
PL12W 0.35036376 W  
PL13W 0.35036376 W  
SFO2 500.0320001 MHz  
SI 32768  
SF 125.7326450 MHz  
WDW EM  
SSB 0  
LB 1.00 Hz  
GB 0  
PC 1.40

N-(4-trifluoromethoxybenzyl)benzo[d]thiazol-2-amine  
PROTON DMSO-d6

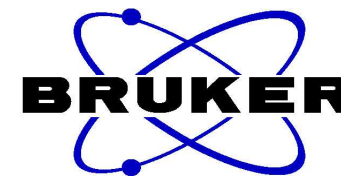

8.555  
8.543  
7.686  
7.671  
7.512  
7.495  
7.393  
7.377  
7.360  
7.343  
7.235  
7.219  
7.204  
7.043  
7.028  
7.013

4.634  
4.622

2.504

0.000

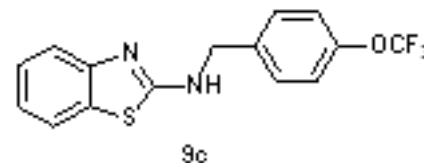

NAME Shx-1  
EXPNO 580  
PROCNO 1  
Date\_ 20101122  
Time 5.11  
INSTRUM spect  
PROBHD 5 mm PABBO BB-  
PULPROG zg30  
TD 65536  
SOLVENT DMSO  
NS 16  
DS 2  
SWH 10330.578 Hz  
FIDRES 0.157632 Hz  
AQ 3.1719923 sec  
RG 64  
DW 48.400 usec  
DE 6.50 usec  
TE 295.1 K  
D1 1.00000000 sec  
TD0 1

===== CHANNEL f1 =====  
NUC1 1H  
P1 11.50 usec  
PL1 1.10 dB  
PL1W 16.96364784 W  
SFO1 500.0330879 MHz  
SI 32768  
SF 500.0300008 MHz  
WDW EM  
SSB 0  
LB 0.30 Hz  
GB 0  
PC 1.00

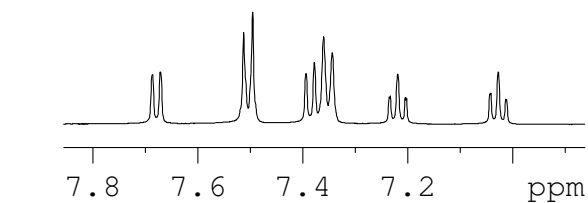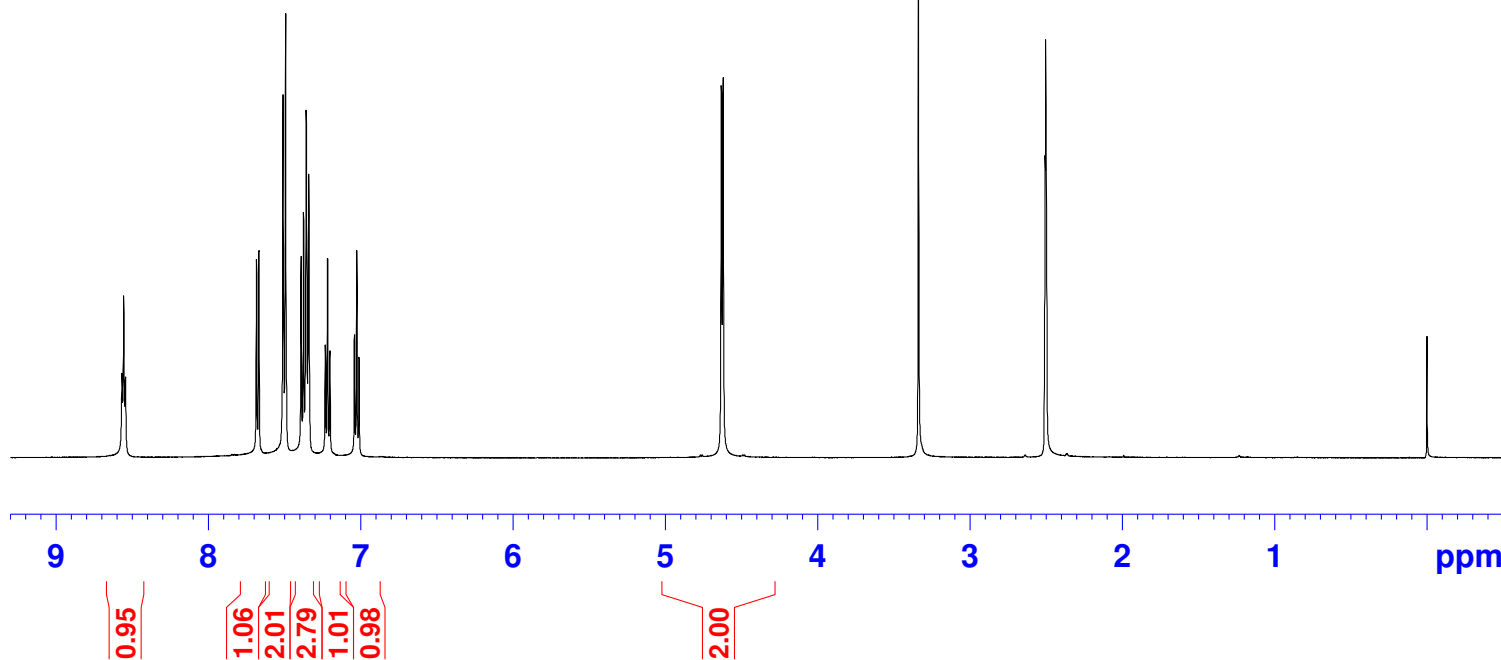

N-(4-trifluoromethoxybenzyl)benzo[d]thiazol-2-amine  
C13CPD DMSO-d6

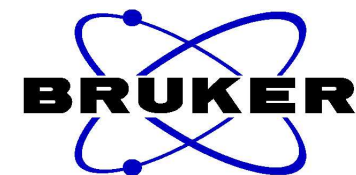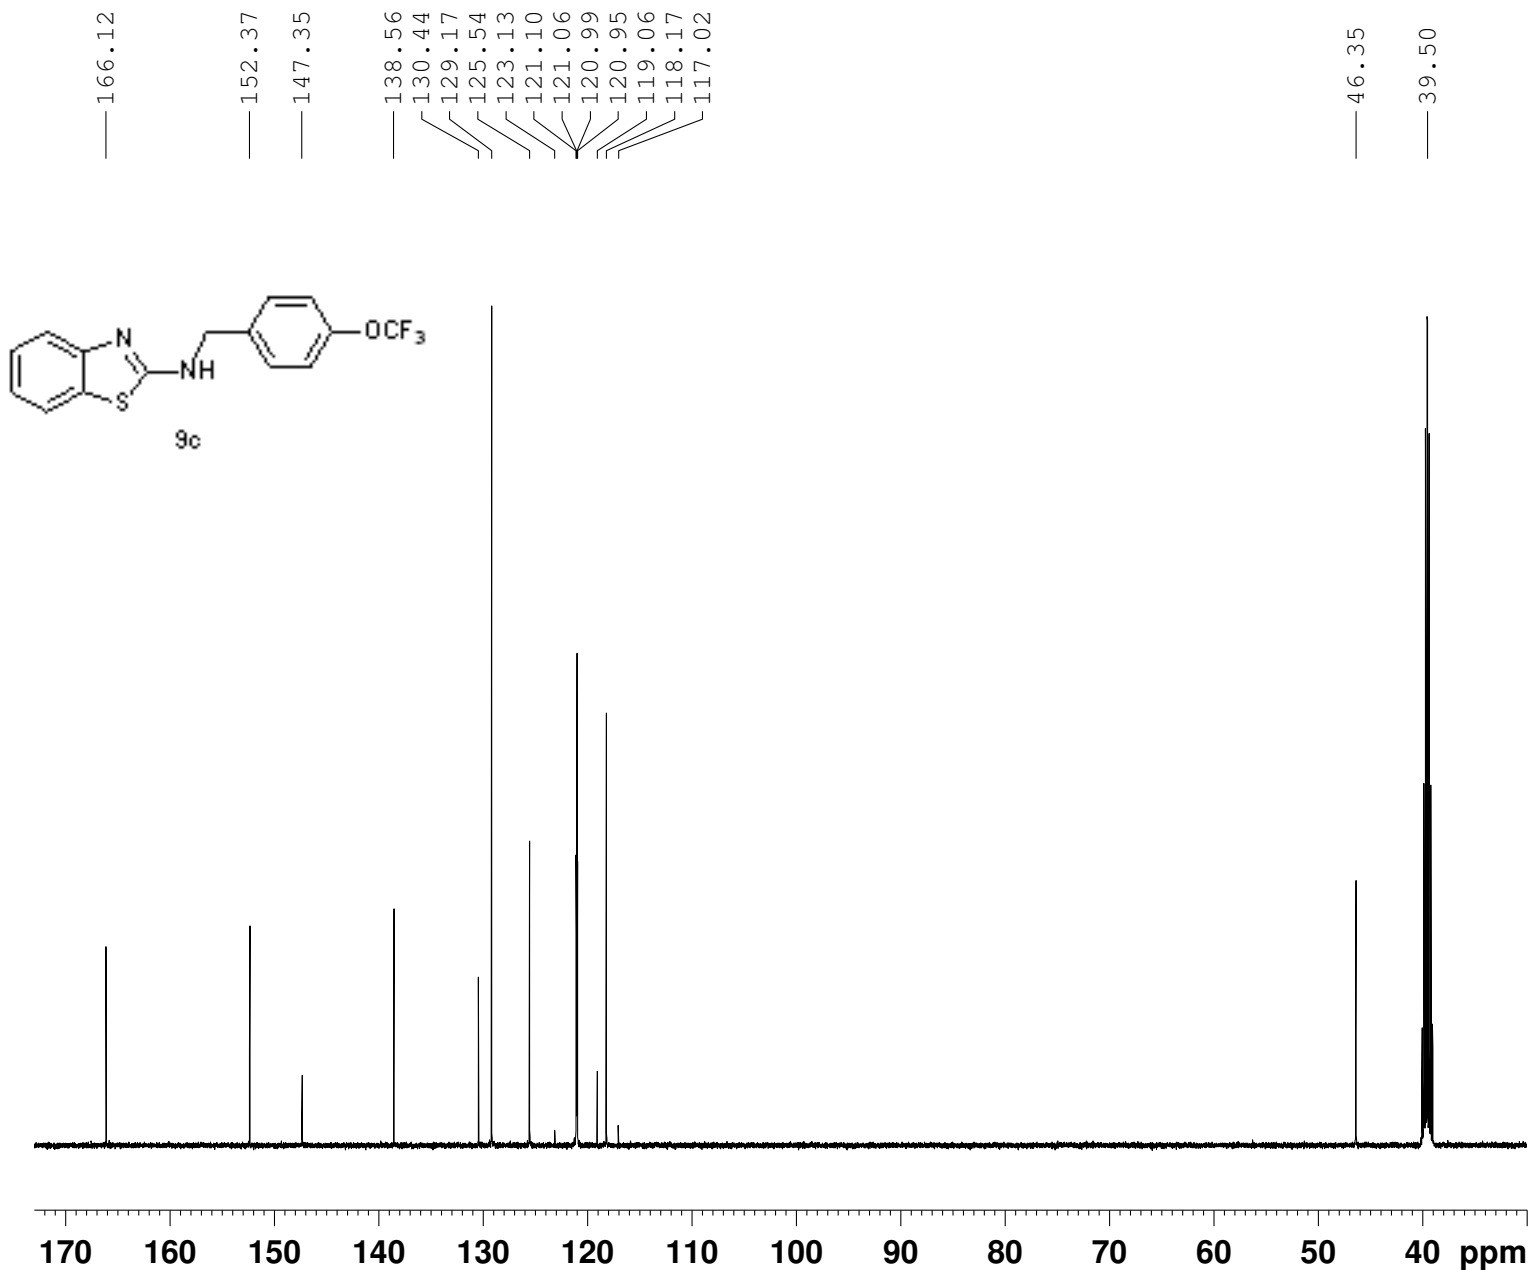

NAME Shx-1  
EXPNO 572  
PROCNO 1  
Date\_ 20101121  
Time 16.50  
INSTRUM spect  
PROBHD 5 mm PABBO BB-  
PULPROG zgpg30  
TD 65536  
SOLVENT DMSO  
NS 2048  
DS 4  
SWH 29761.904 Hz  
FIDRES 0.454131 Hz  
AQ 1.1010548 sec  
RG 203  
DW 16.800 usec  
DE 6.50 usec  
TE 296.5 K  
D1 2.00000000 sec  
D11 0.03000000 sec  
TD0 1

==== CHANNEL f1 =====  
NUC1 13C  
P1 9.60 usec  
PL1 -1.00 dB  
PL1W 125.85865021 W  
SFO1 125.7452168 MHz

==== CHANNEL f2 =====  
CPDPRG2 waltz16  
NUC2 1H  
PCPD2 80.00 usec  
PL2 1.10 dB  
PL12 17.95 dB  
PL13 17.95 dB  
PL2W 16.96364784 W  
PL12W 0.35036376 W  
PL13W 0.35036376 W  
SFO2 500.0320001 MHz  
SI 32768  
SF 125.7327054 MHz  
WDW no  
SSB 0  
LB 0.00 Hz  
GB 0  
PC 1.40

N-(3,4-dimethoxybenzyl)benzo[d]thiazol-2-amine  
PROTON CDCl<sub>3</sub>

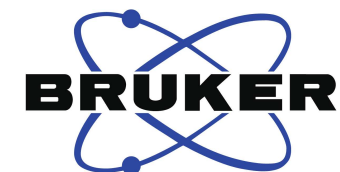

Current Data Parameters  
NAME Lifeng-1H  
EXPNO 115  
PROCNO 1

F2 - Acquisition Parameters  
Date\_ 20100808  
Time 0.58  
INSTRUM spect  
PROBHD 5 mm PABBO BB-  
PULPROG zg30  
TD 65536  
SOLVENT CDCl<sub>3</sub>  
NS 16  
DS 2  
SWH 10330.578 Hz  
FIDRES 0.157632 Hz  
AQ 3.1719923 sec  
RG 36  
DW 48.400 usec  
DE 6.50 usec  
TE 296.9 K  
D1 1.00000000 sec  
TD0 1

==== CHANNEL f1 =====  
NUC1 1H  
P1 11.50 usec  
PL1 1.10 dB  
PL1W 16.96364784 W  
SFO1 500.0330879 MHz

F2 - Processing parameters  
SI 32768  
SF 500.0300106 MHz  
WDW EM  
SSB 0  
LB 0.30 Hz  
GB 0  
PC 1.00

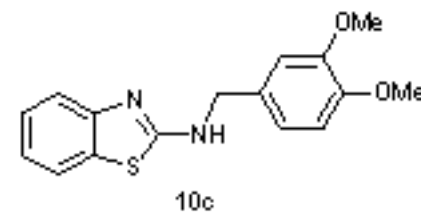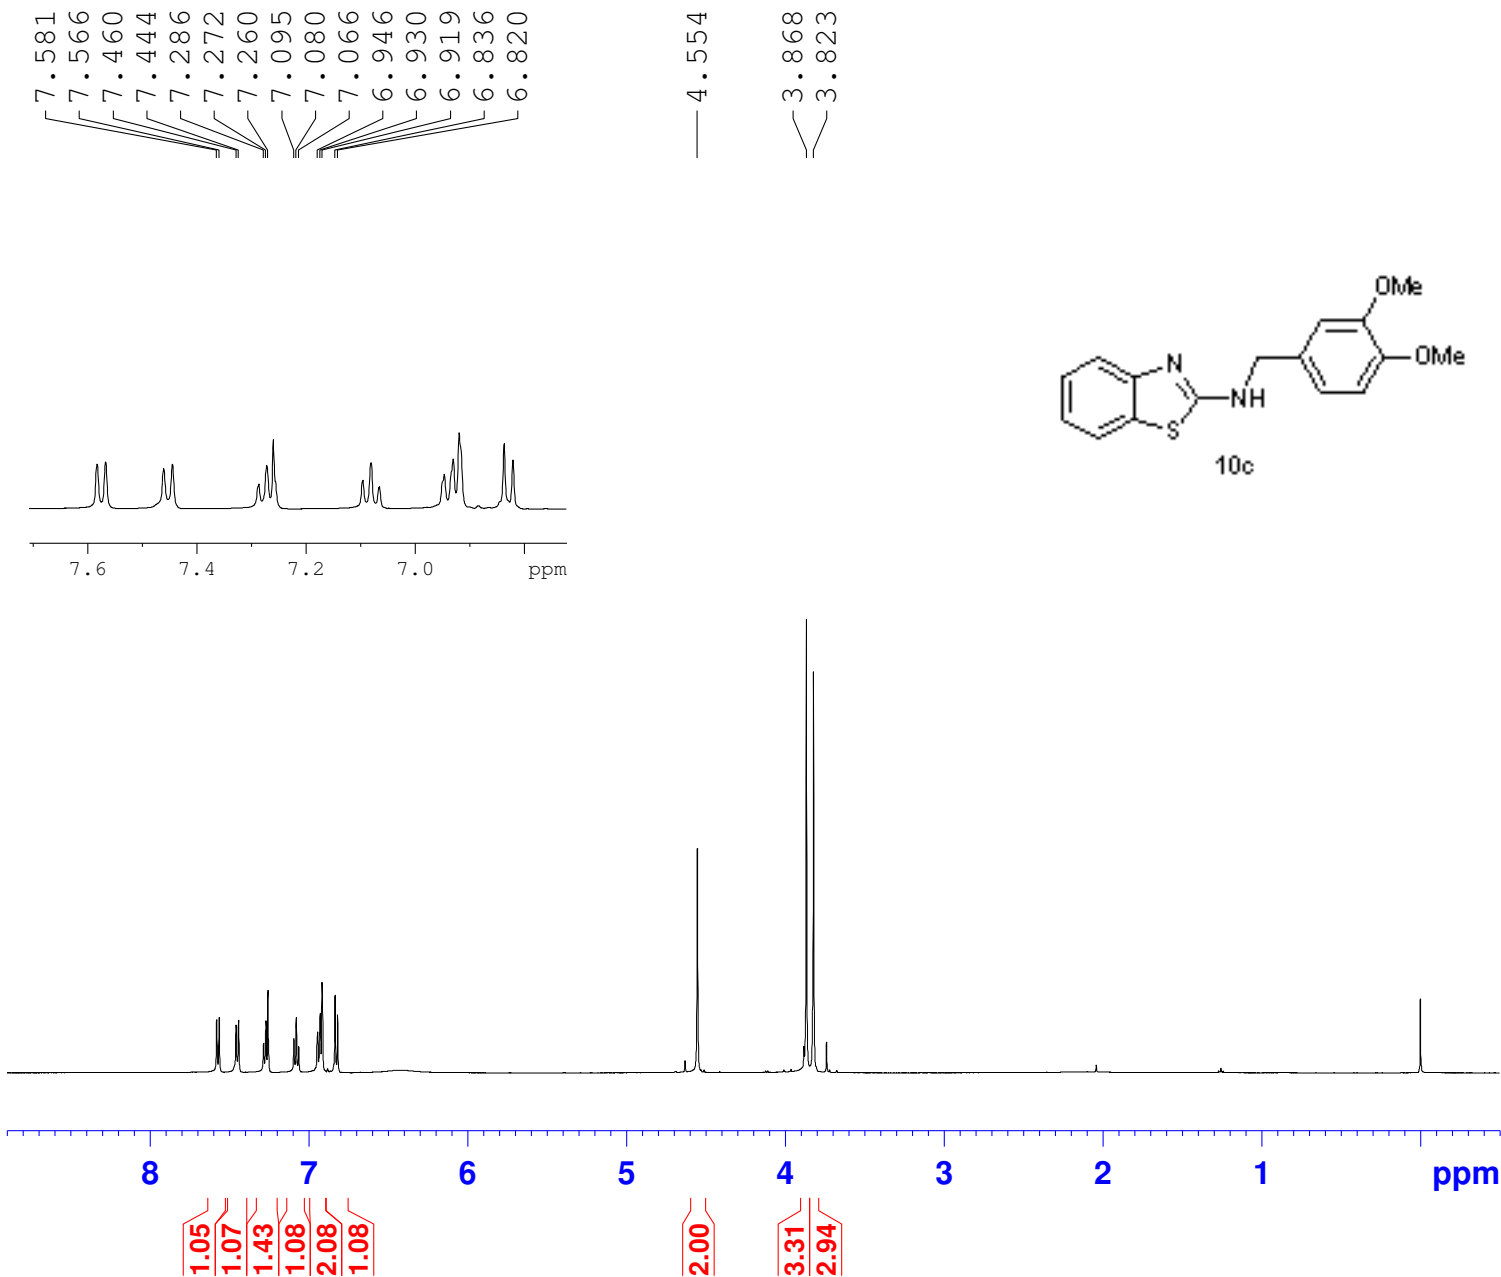

N-(3,4-dimethoxybenzyl)benzo[d]thiazol-2-amine  
C13CPD CDC13

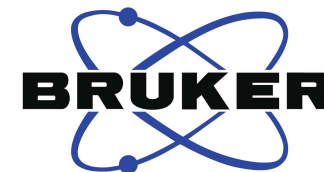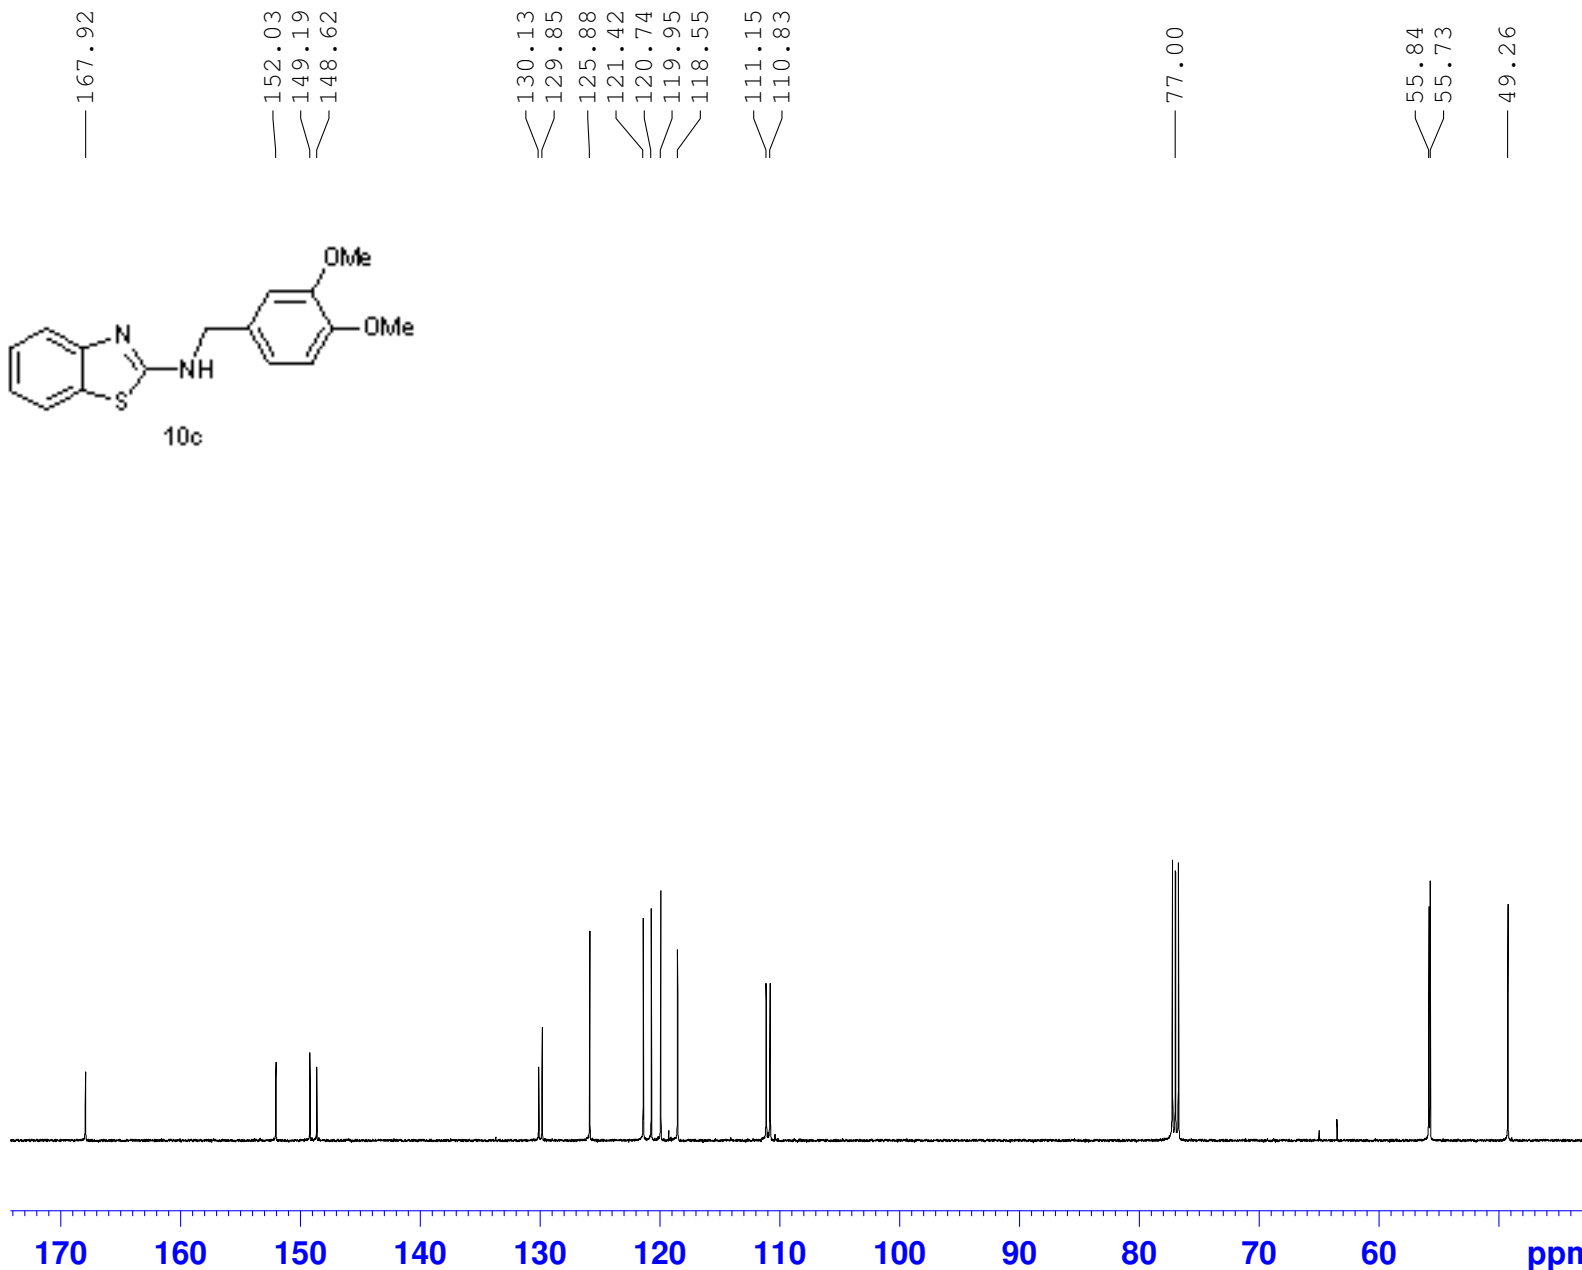

Current Data Parameters  
NAME Lifeng-1H  
EXPNO 116  
PROCNO 1

F2 - Acquisition Parameters  
Date\_ 20100808  
Time 16.53  
INSTRUM spect  
PROBHD 5 mm PABBO BB-  
PULPROG zgpg30  
TD 65536  
SOLVENT CDC13  
NS 1024  
DS 4  
SWH 29761.904 Hz  
FIDRES 0.454131 Hz  
AQ 1.1010548 sec  
RG 203  
DW 16.800 usec  
DE 6.50 usec  
TE 298.7 K  
D1 2.00000000 sec  
D11 0.03000000 sec  
TD0 1

==== CHANNEL f1 =====  
NUC1 13C  
P1 9.60 usec  
PL1 -1.00 dB  
PL1W 125.85865021 W  
SFO1 125.7452168 MHz

==== CHANNEL f2 =====  
CPDPRG2 waltz16  
NUC2 1H  
PCPD2 80.00 usec  
PL2 1.10 dB  
PL12 17.95 dB  
PL13 17.95 dB  
PL2W 16.96364784 W  
PL12W 0.35036376 W  
PL13W 0.35036376 W  
SFO2 500.0320001 MHz

F2 - Processing parameters  
SI 32768  
SF 125.7326564 MHz  
WDW EM  
SSB 0  
LB 1.00 Hz  
GB 0  
PC 1.40

N-(2,4-dichlorobenzyl)benzo[d]thiazol-2-amine  
PROTON CDC13

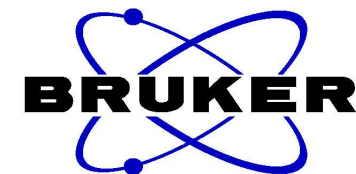

7.471  
7.453  
7.436  
7.408  
7.403  
7.298  
7.283  
7.268  
7.255  
7.219  
7.215  
7.202  
7.198  
7.107  
7.093  
7.077  
6.272  
— 4.699  
— 0.000

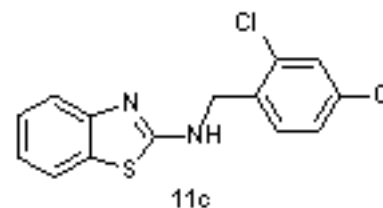

NAME Shx-1  
EXPNO 131  
PROCNO 1  
Date\_ 20100804  
Time 1.13  
INSTRUM spect  
PROBHD 5 mm PABBO BB-  
PULPROG zg30  
TD 65536  
SOLVENT CDC13  
NS 16  
DS 2  
SWH 10330.578 Hz  
FIDRES 0.157632 Hz  
AQ 3.1719923 sec  
RG 203  
DW 48.400 usec  
DE 6.50 usec  
TE 298.9 K  
D1 1.00000000 sec  
TD0 1

==== CHANNEL f1 =====  
NUC1 1H  
P1 11.50 usec  
PL1 1.10 dB  
PL1W 16.96364784 W  
SFO1 500.0330879 MHz  
SI 32768  
SF 500.0300132 MHz  
WDW EM  
SSB 0  
LB 0.30 Hz  
GB 0  
PC 1.00

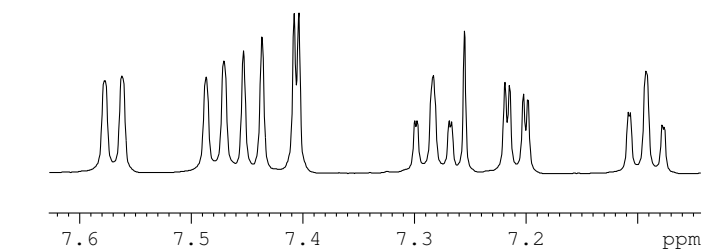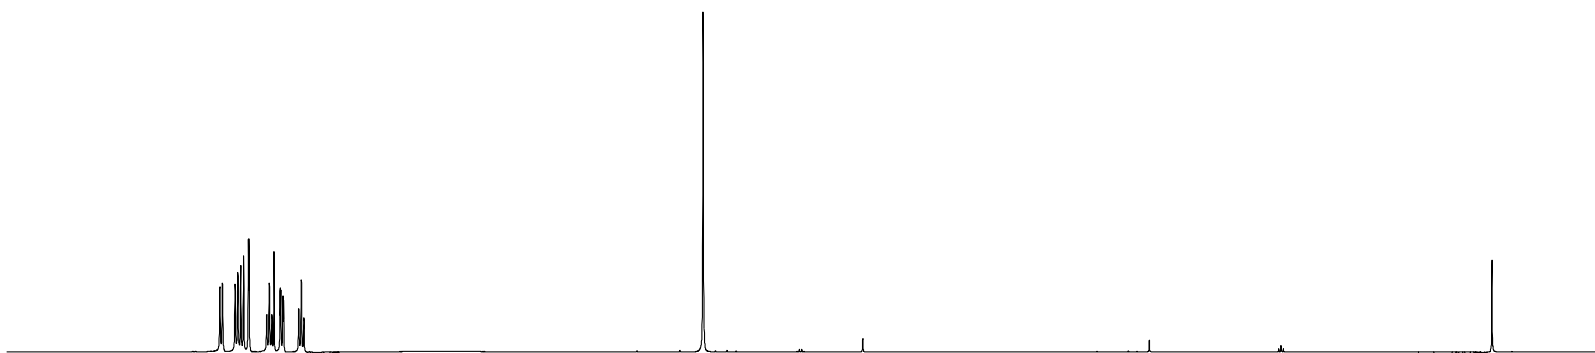

0.98  
1.01  
0.97  
0.89  
1.01  
0.93  
0.97

2.00

8 7 6 5 4 3 2 1 0 ppm

N-(2,4-dichlorobenzyl)benzo[d]thiazol-2-amine  
C13CPD CDC13

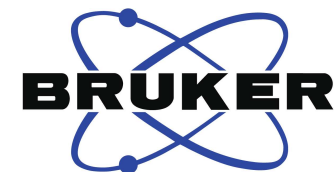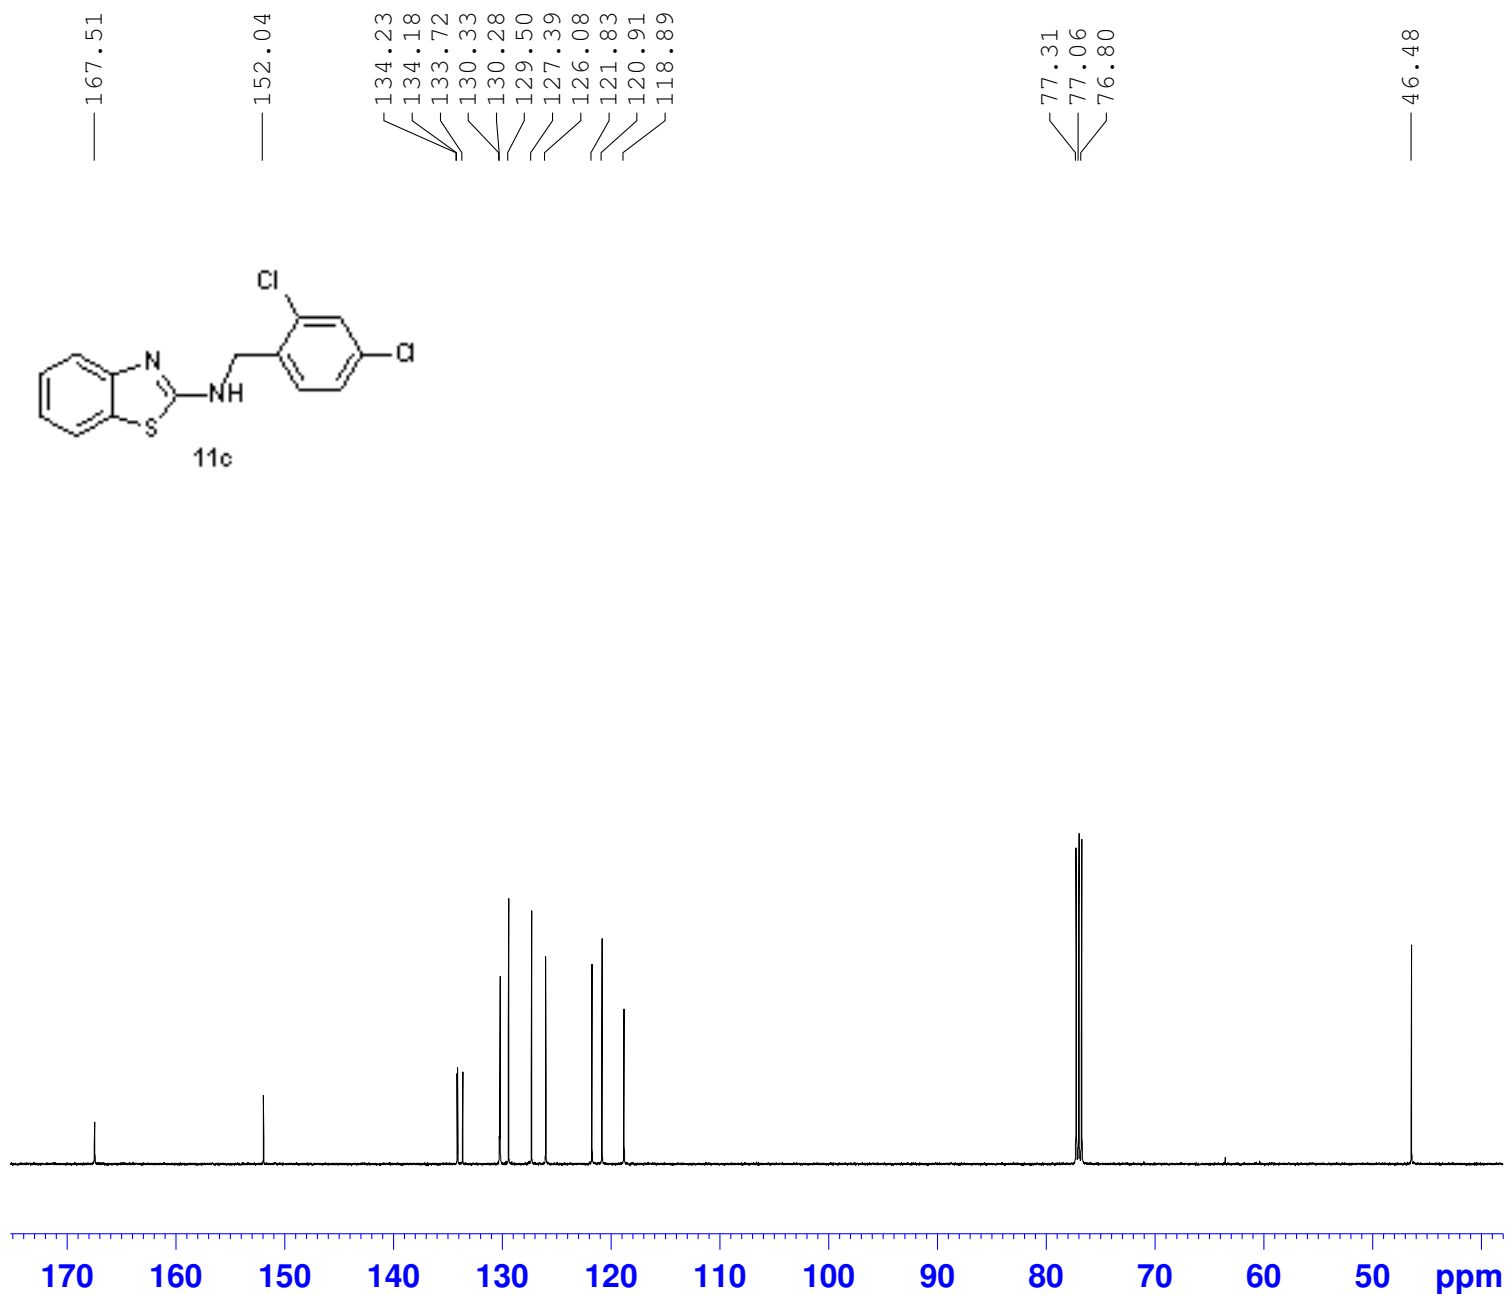

Current Data Parameters  
NAME Lifeng-1H  
EXPNO 161  
PROCNO 1

F2 - Acquisition Parameters  
Date\_ 20100808  
Time 15.25  
INSTRUM spect  
PROBHD 5 mm PABBO BB-  
PULPROG zgpg30  
TD 65536  
SOLVENT CDC13  
NS 1024  
DS 4  
SWH 29761.904 Hz  
FIDRES 0.454131 Hz  
AQ 1.1010548 sec  
RG 203  
DW 16.800 usec  
DE 6.50 usec  
TE 298.3 K  
D1 2.0000000 sec  
D11 0.03000000 sec  
TD0 1

==== CHANNEL f1 =====  
NUC1 13C  
P1 9.60 usec  
PL1 -1.00 dB  
PL1W 125.85865021 W  
SFO1 125.7452168 MHz

==== CHANNEL f2 =====  
CPDPRG2 waltz16  
NUC2 1H  
PCPD2 80.00 usec  
PL2 1.10 dB  
PL12 17.95 dB  
PL13 17.95 dB  
PL2W 16.96364784 W  
PL12W 0.35036376 W  
PL13W 0.35036376 W  
SFO2 500.0320001 MHz

F2 - Processing parameters  
SI 32768  
SF 125.7326512 MHz  
WDW EM  
SSB 0  
LB 1.00 Hz  
GB 0  
PC 1.40

N-(pyridin-2-ylmethyl)benzo[d]thiazol-2-amine  
PROTON DMSO-d<sub>6</sub>, at 353 K

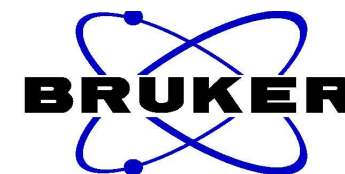

8.540  
8.330  
7.752  
7.737  
7.722  
7.644  
7.628  
7.432  
7.417  
7.380  
7.364  
7.265  
7.254  
7.243  
7.216  
7.201  
7.186  
7.024  
7.008  
6.993  
— 4.691  
— 2.485  
— 0.000

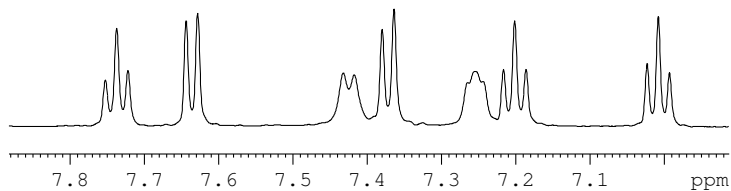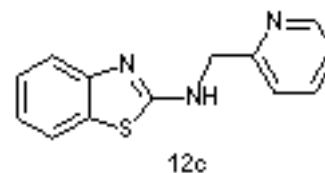

```
NAME          test
EXPNO         3
PROCNO       1
Date_        20110104
Time         17.10
INSTRUM      spect
PROBHD       5 mm PABBO BB-
PULPROG      zg30
TD           65536
SOLVENT      DMSO
NS           8
DS           2
SWH          8000.000 Hz
FIDRES       0.122070 Hz
AQ           4.0960498 sec
RG           90.5
DW           62.500 usec
DE           9.46 usec
TE           353.0 K
D1           1.00000000 sec
```

```
===== CHANNEL f1 =====
NUC1          1H
P1            11.50 usec
SI            32768
SF            500.0300109 MHz
WDW           EM
SSB           0
LB            0.30 Hz
GB            0
PC            1.00
```

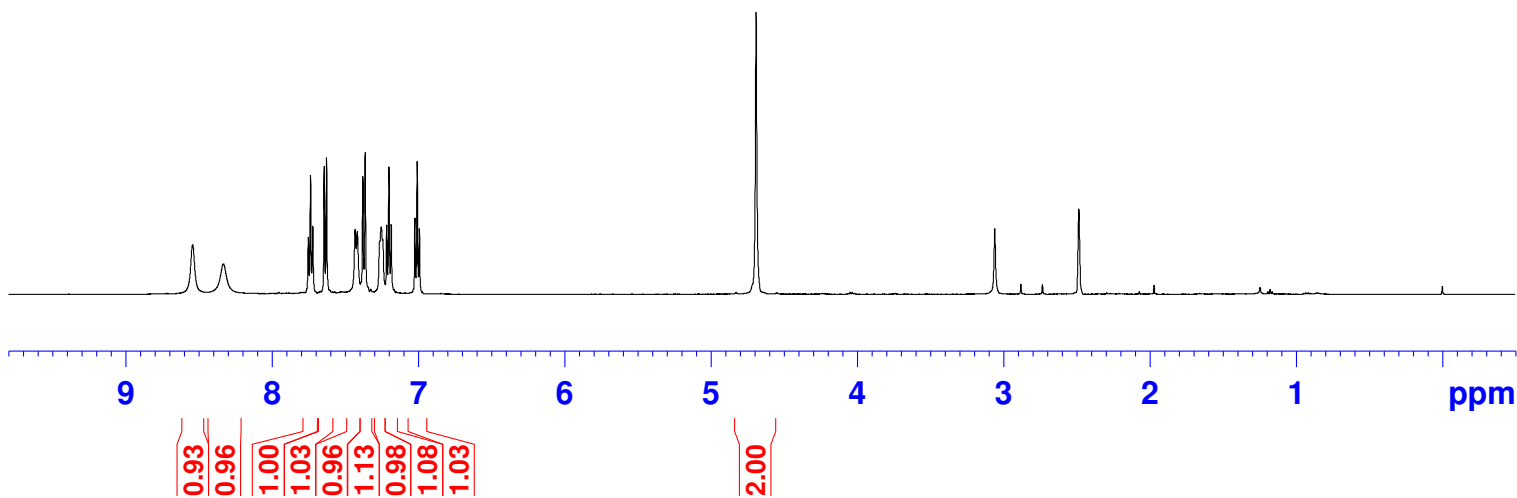



N-(pyridin-2-ylmethyl)benzo[d]thiazol-2-amine  
C13CPD DMSO-d6 at 353 K

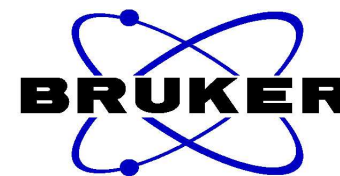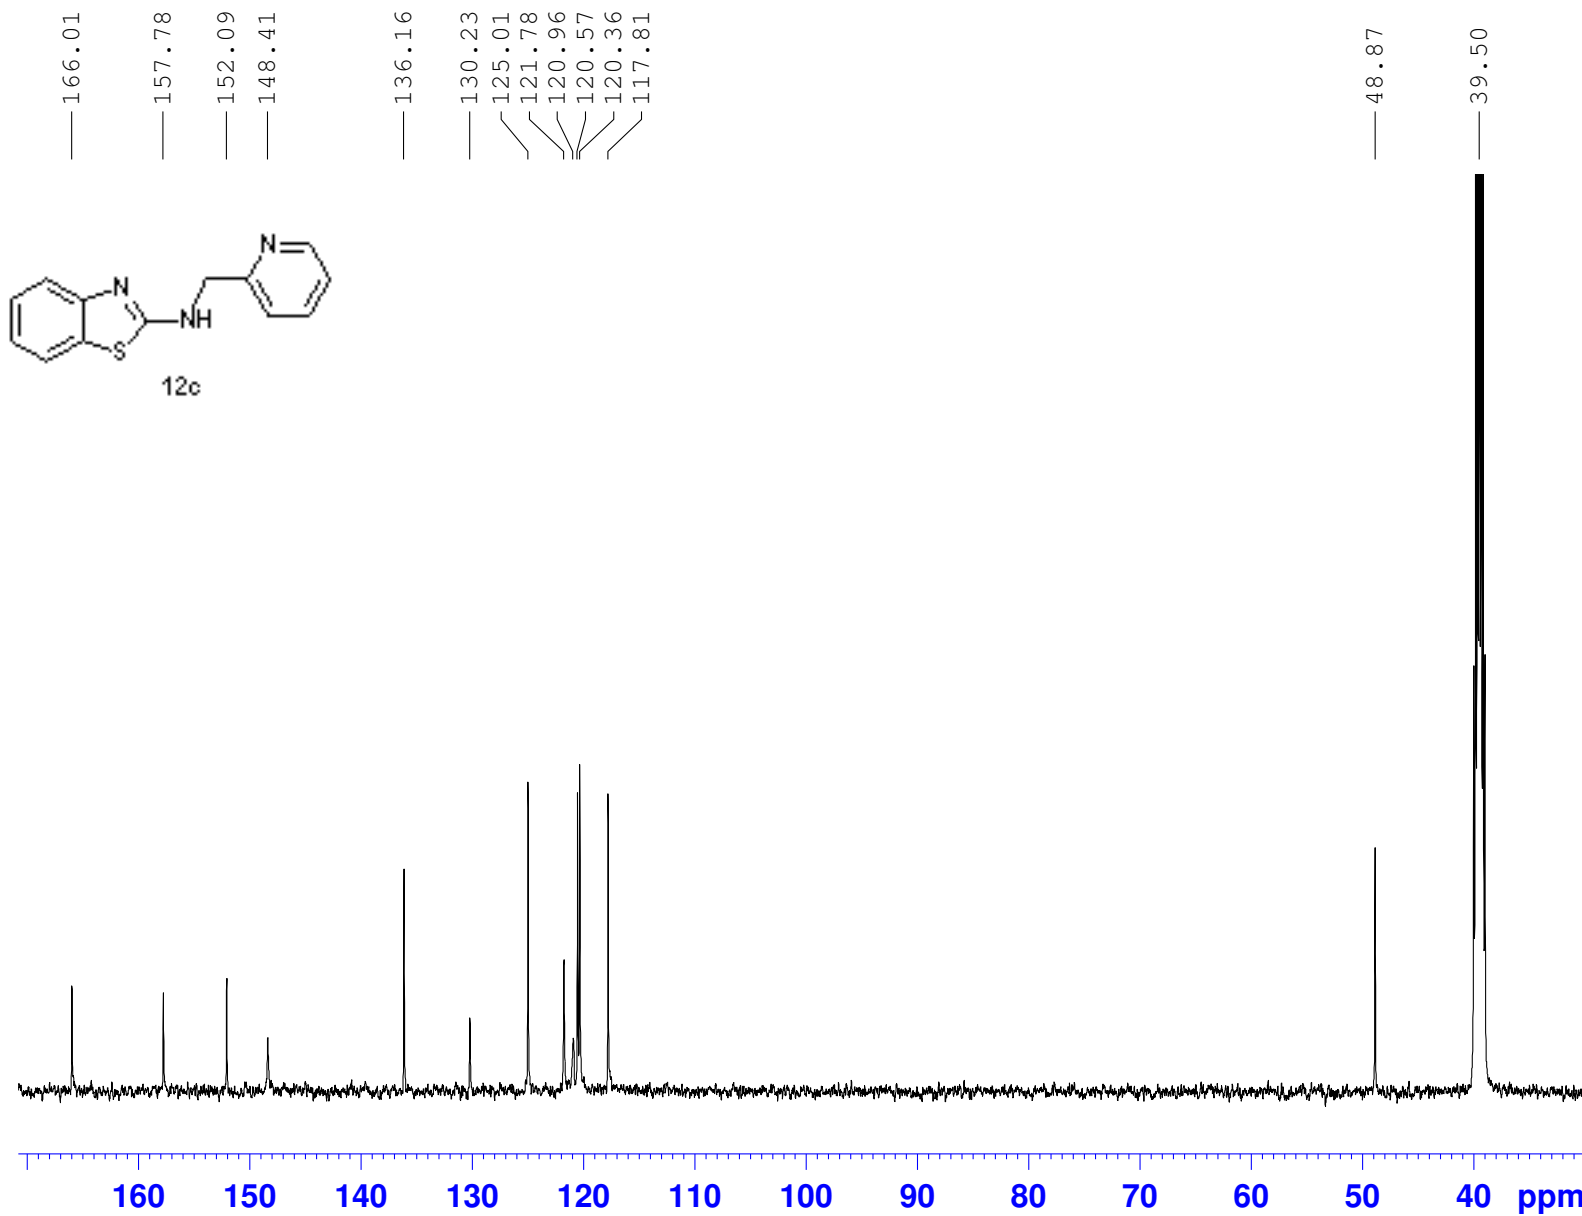

N-(naphthalen-1-ylmethyl)benzo[d]thiazol-2-amine  
PROTON DMSO-d6

8.549  
8.538  
8.143  
8.127  
7.984  
7.968  
7.893  
7.877  
7.685  
7.669  
7.602  
7.589  
7.575  
7.563  
7.557  
7.543  
7.508  
7.492  
7.477  
7.422  
7.406  
7.243  
7.228  
7.212  
7.044  
7.029  
7.014  
5.075  
5.064

2.502

0.000

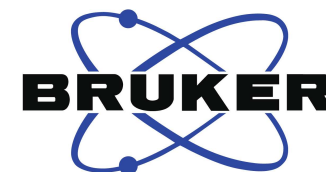

Current Data Parameters  
NAME Lifeng-1H  
EXPNO 582  
PROCNO 1

F2 - Acquisition Parameters

Date\_ 20101122  
Time 5.25  
INSTRUM spect  
PROBHD 5 mm PABBO BB-  
PULPROG zg30  
TD 65536  
SOLVENT DMSO  
NS 16  
DS 2  
SWH 10330.578 Hz  
FIDRES 0.157632 Hz  
AQ 3.1719923 sec  
RG 64  
DW 48.400 usec  
DE 6.50 usec  
TE 295.0 K  
D1 1.00000000 sec  
TD0 1

==== CHANNEL f1 =====

NUC1 1H  
P1 11.50 usec  
PL1 1.10 dB  
PL1W 16.96364784 W  
SFO1 500.0330879 MHz

F2 - Processing parameters

SI 32768  
SF 500.0300018 MHz  
WDW EM  
SSB 0  
LB 0.30 Hz  
GB 0  
PC 1.00

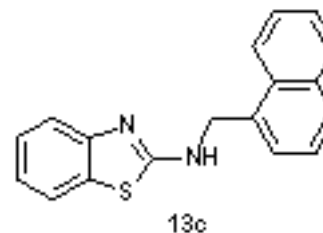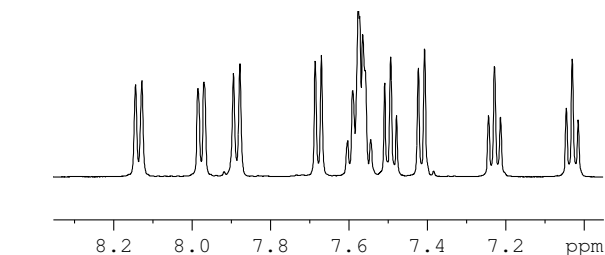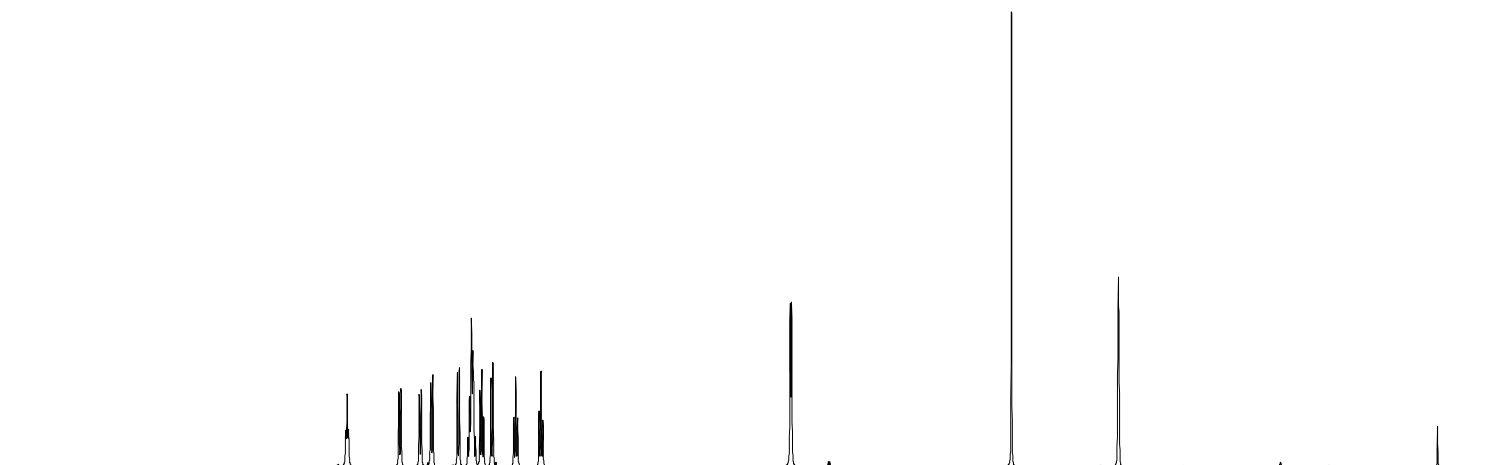

11 10 9 8 7 6 5 4 3 2 1 ppm

1.00  
1.02  
1.01  
1.14  
1.05  
3.07  
1.09  
1.04  
1.06  
1.05

2.07

N-(naphthalen-1-ylmethyl)benzo[d]thiazol-2-amine  
C13CPD DMSO-d6

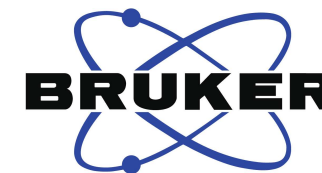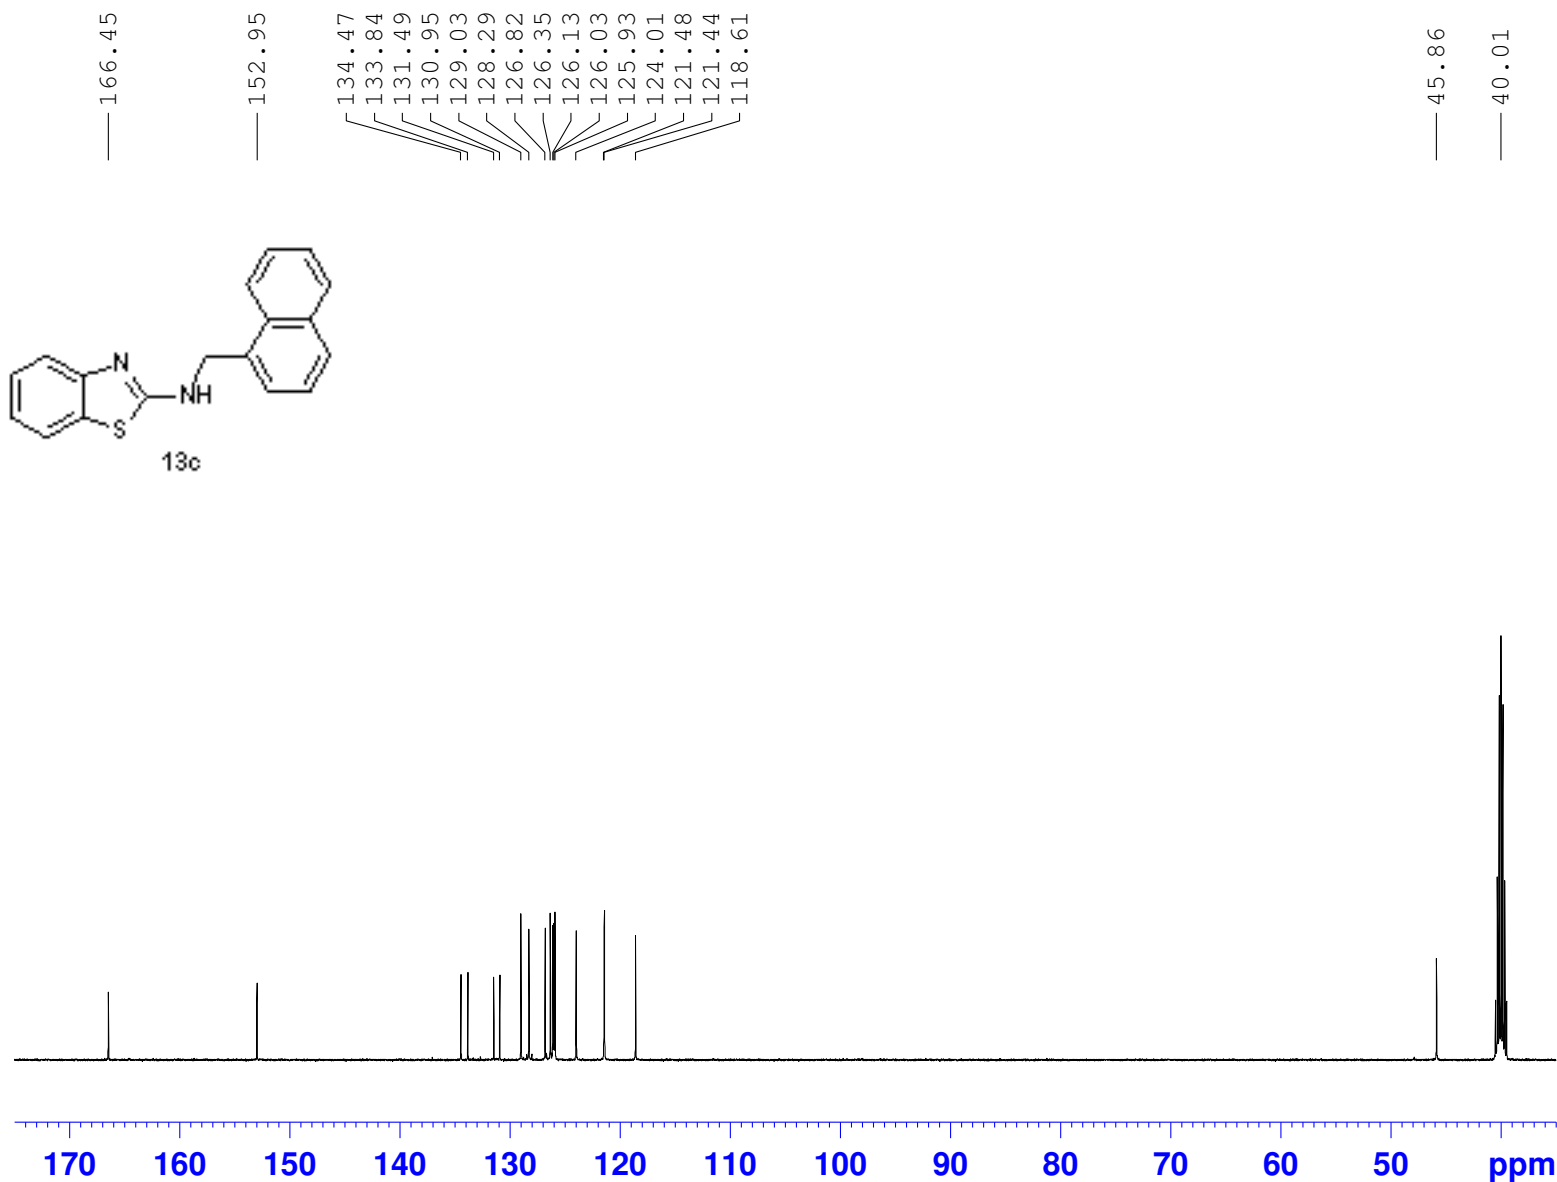

Current Data Parameters  
NAME Lifeng-1H  
EXPNO 576  
PROCNO 1

F2 - Acquisition Parameters  
Date\_ 20101122  
Time 0.46  
INSTRUM spect  
PROBHD 5 mm PABBO BB-  
PULPROG zgpg30  
TD 65536  
SOLVENT DMSO  
NS 833  
DS 4  
SWH 29761.904 Hz  
FIDRES 0.454131 Hz  
AQ 1.1010548 sec  
RG 203  
DW 16.800 usec  
DE 6.50 usec  
TE 296.8 K  
D1 2.0000000 sec  
D11 0.03000000 sec  
TD0 1

==== CHANNEL f1 =====  
NUC1 13C  
P1 9.60 usec  
PL1 -1.00 dB  
PL1W 125.85865021 W  
SFO1 125.7452168 MHz

==== CHANNEL f2 =====  
CPDPRG2 waltz16  
NUC2 1H  
PCPD2 80.00 usec  
PL2 1.10 dB  
PL12 17.95 dB  
PL13 17.95 dB  
PL2W 16.96364784 W  
PL12W 0.35036376 W  
PL13W 0.35036376 W  
SFO2 500.0320001 MHz

F2 - Processing parameters  
SI 32768  
SF 125.7326450 MHz  
WDW EM  
SSB 0  
LB 1.00 Hz  
GB 0  
PC 1.40

N-benzyl-6-methylbenzo[d]thiazol-2-amine  
PROTON DMSO-d6

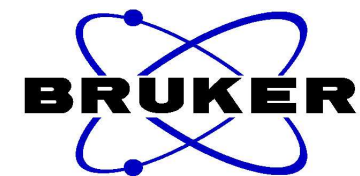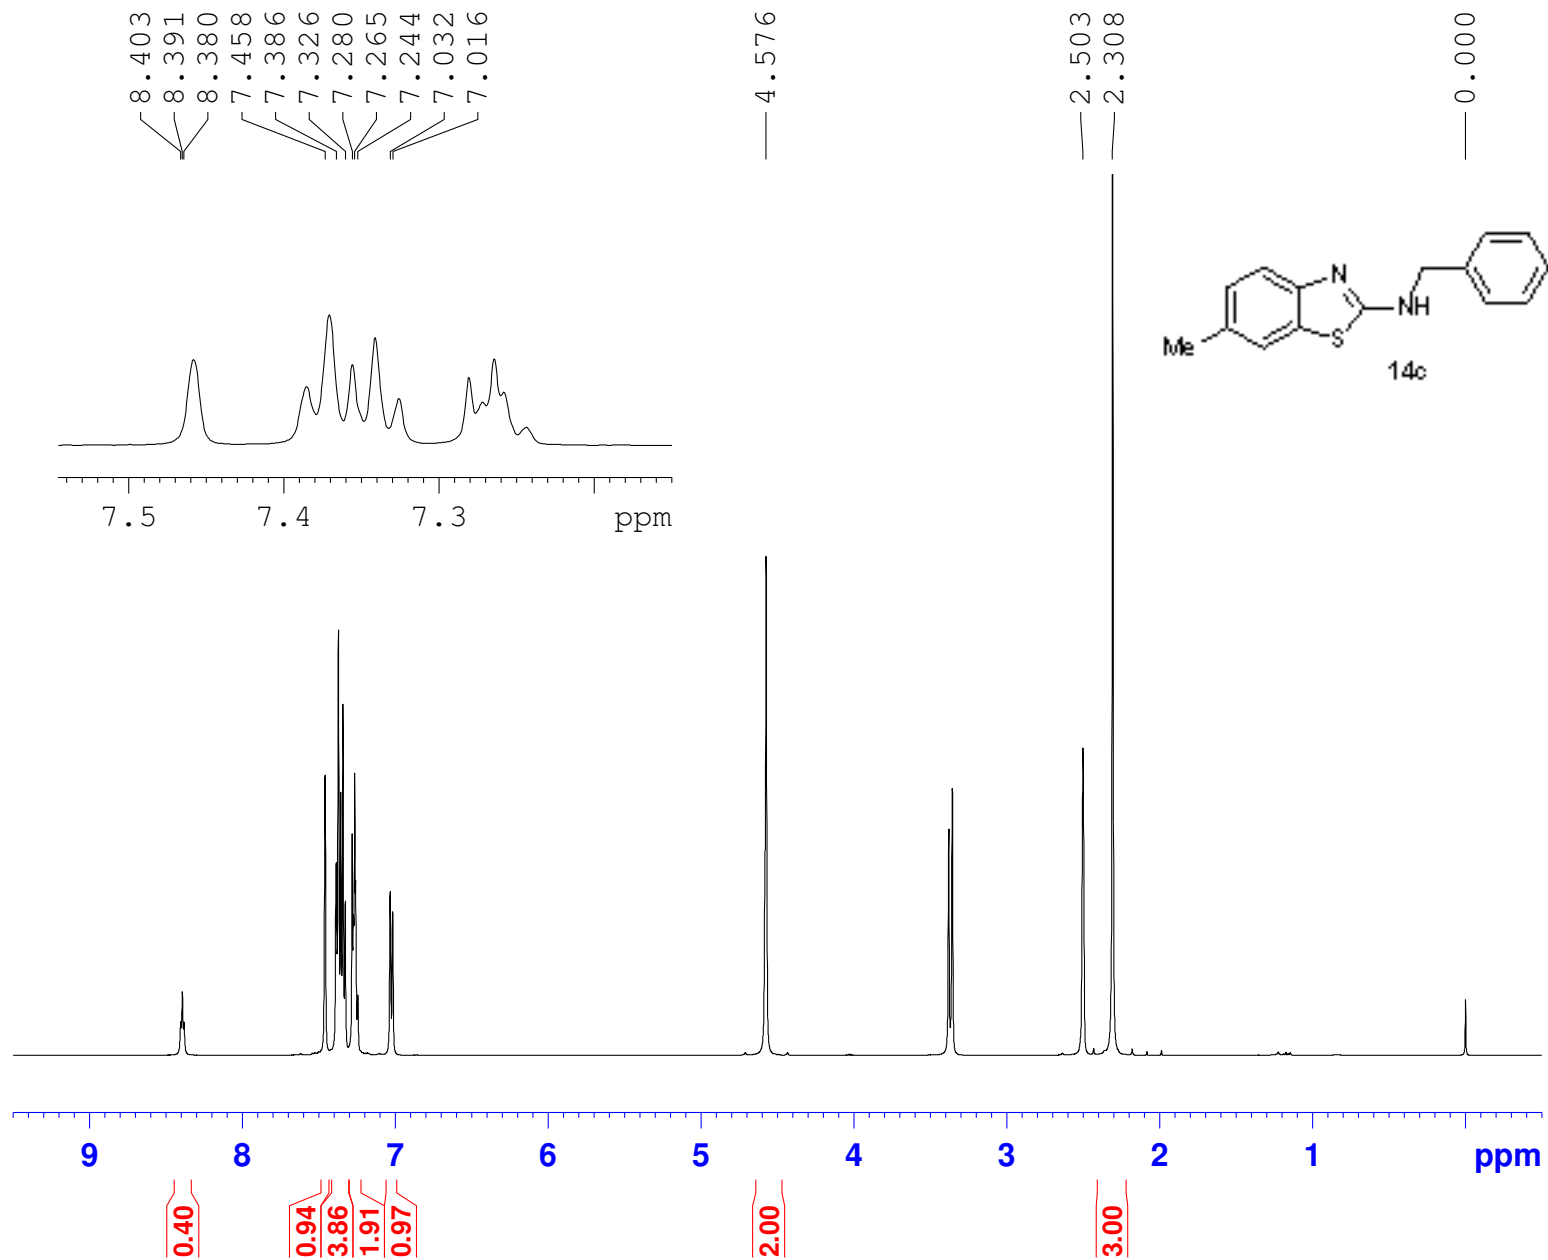

NAME Shx-1  
EXPNO 111  
PROCNO 1  
Date\_ 20100711  
Time 15.21  
INSTRUM spect  
PROBHD 5 mm PABBO BB-  
PULPROG zg30  
TD 65536  
SOLVENT DMSO  
NS 16  
DS 2  
SWH 10330.578 Hz  
FIDRES 0.157632 Hz  
AQ 3.1719923 sec  
RG 50.8  
DW 48.400 usec  
DE 6.50 usec  
TE 295.6 K  
D1 1.00000000 sec  
TD0 1

===== CHANNEL f1 =====  
NUC1 1H  
P1 11.50 usec  
PL1 1.10 dB  
PL1W 16.96364784 W  
SFO1 500.0330879 MHz  
SI 32768  
SF 500.0300013 MHz  
WDW EM  
SSB 0  
LB 0.30 Hz  
GB 0  
PC 1.00

N-benzyl-6-methylbenzo[d]thiazol-2-amine  
C13CPD DMSO-d6

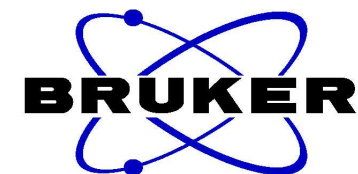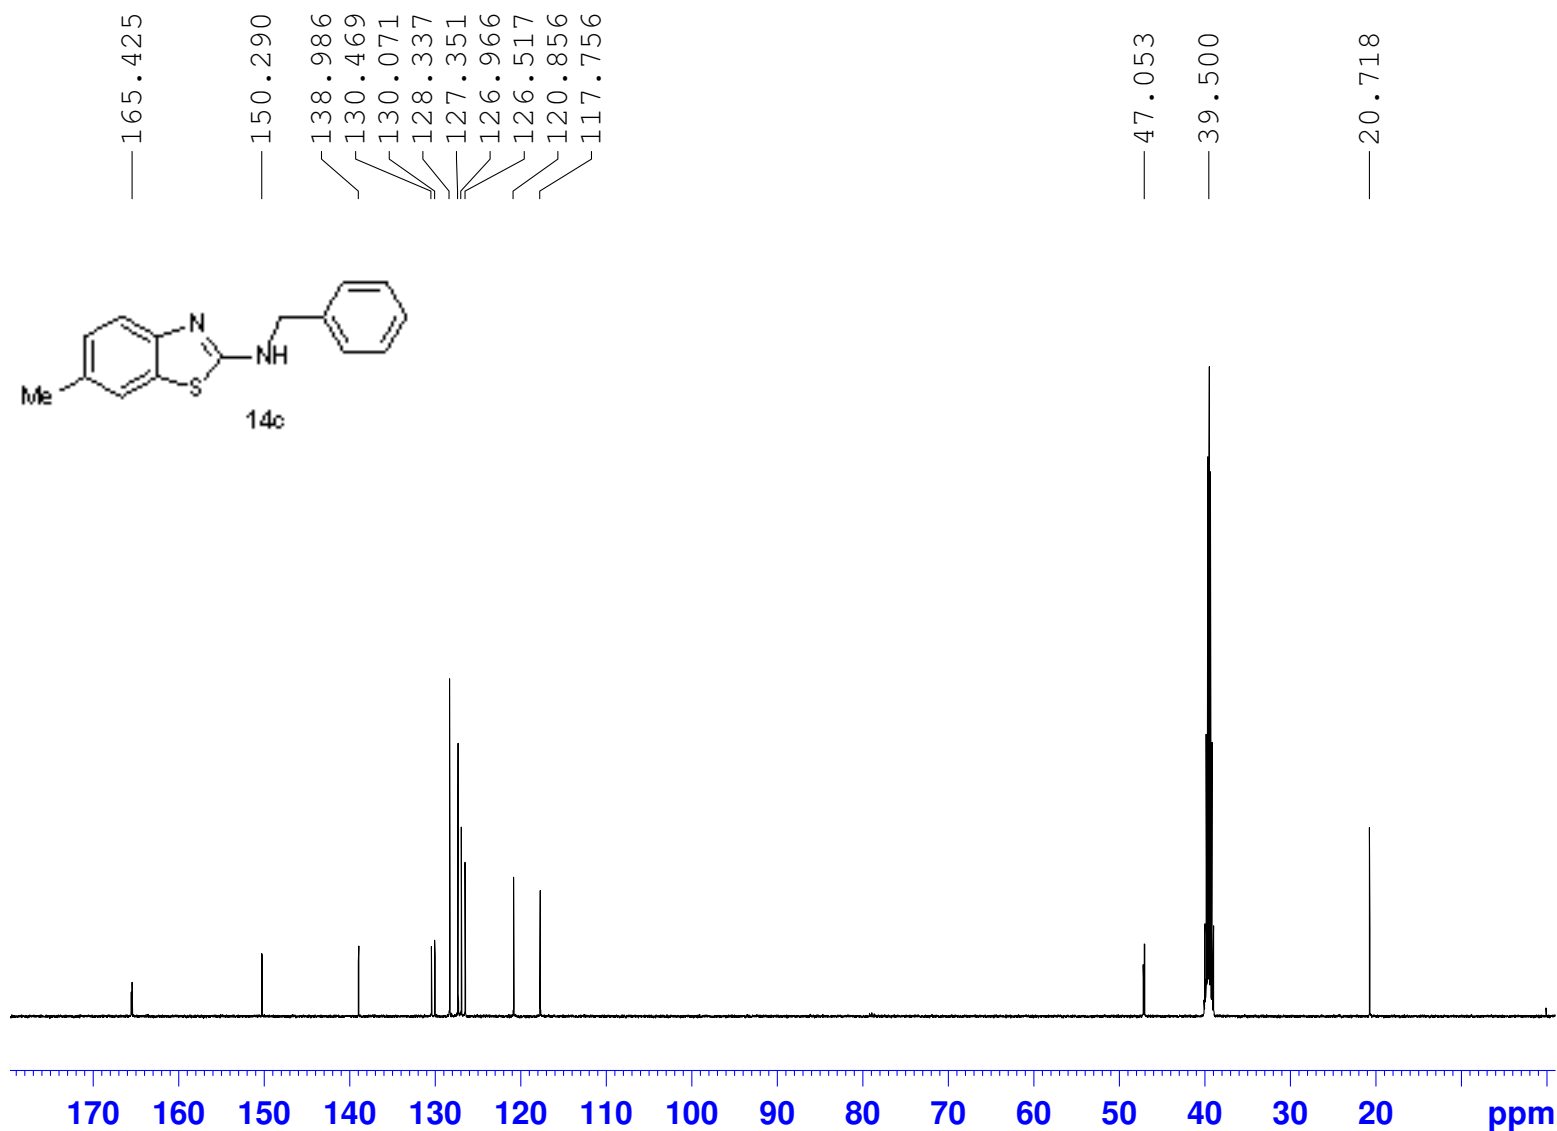

NAME Shx-1  
EXPNO 112  
PROCNO 1  
Date\_ 20100711  
Time 16.21  
INSTRUM spect  
PROBHD 5 mm PABBO BB-  
PULPROG zgpg30  
TD 65536  
SOLVENT DMSO  
NS 1024  
DS 4  
SWH 29761.904 Hz  
FIDRES 0.454131 Hz  
AQ 1.1010548 sec  
RG 203  
DW 16.800 usec  
DE 6.50 usec  
TE 297.3 K  
D1 2.00000000 sec  
D11 0.03000000 sec  
TD0 1

==== CHANNEL f1 =====  
NUC1 13C  
P1 9.60 usec  
PL1 -1.00 dB  
PL1W 125.85865021 W  
SFO1 125.7452168 MHz

==== CHANNEL f2 =====  
CPDPRG2 waltz16  
NUC2 1H  
PCPD2 80.00 usec  
PL2 1.10 dB  
PL12 17.95 dB  
PL13 17.95 dB  
PL2W 16.96364784 W  
PL12W 0.35036376 W  
PL13W 0.35036376 W  
SFO2 500.0320001 MHz  
SI 32768  
SF 125.7327058 MHz  
WDW EM  
SSB 0  
LB 1.00 Hz  
GB 0  
PC 1.40

N-benzyl-4,6-dimethylbenzo[d]thiazol-2-amine  
PROTON DMSO-d6

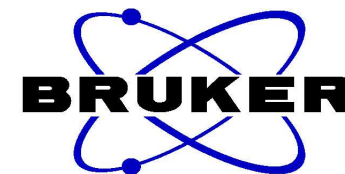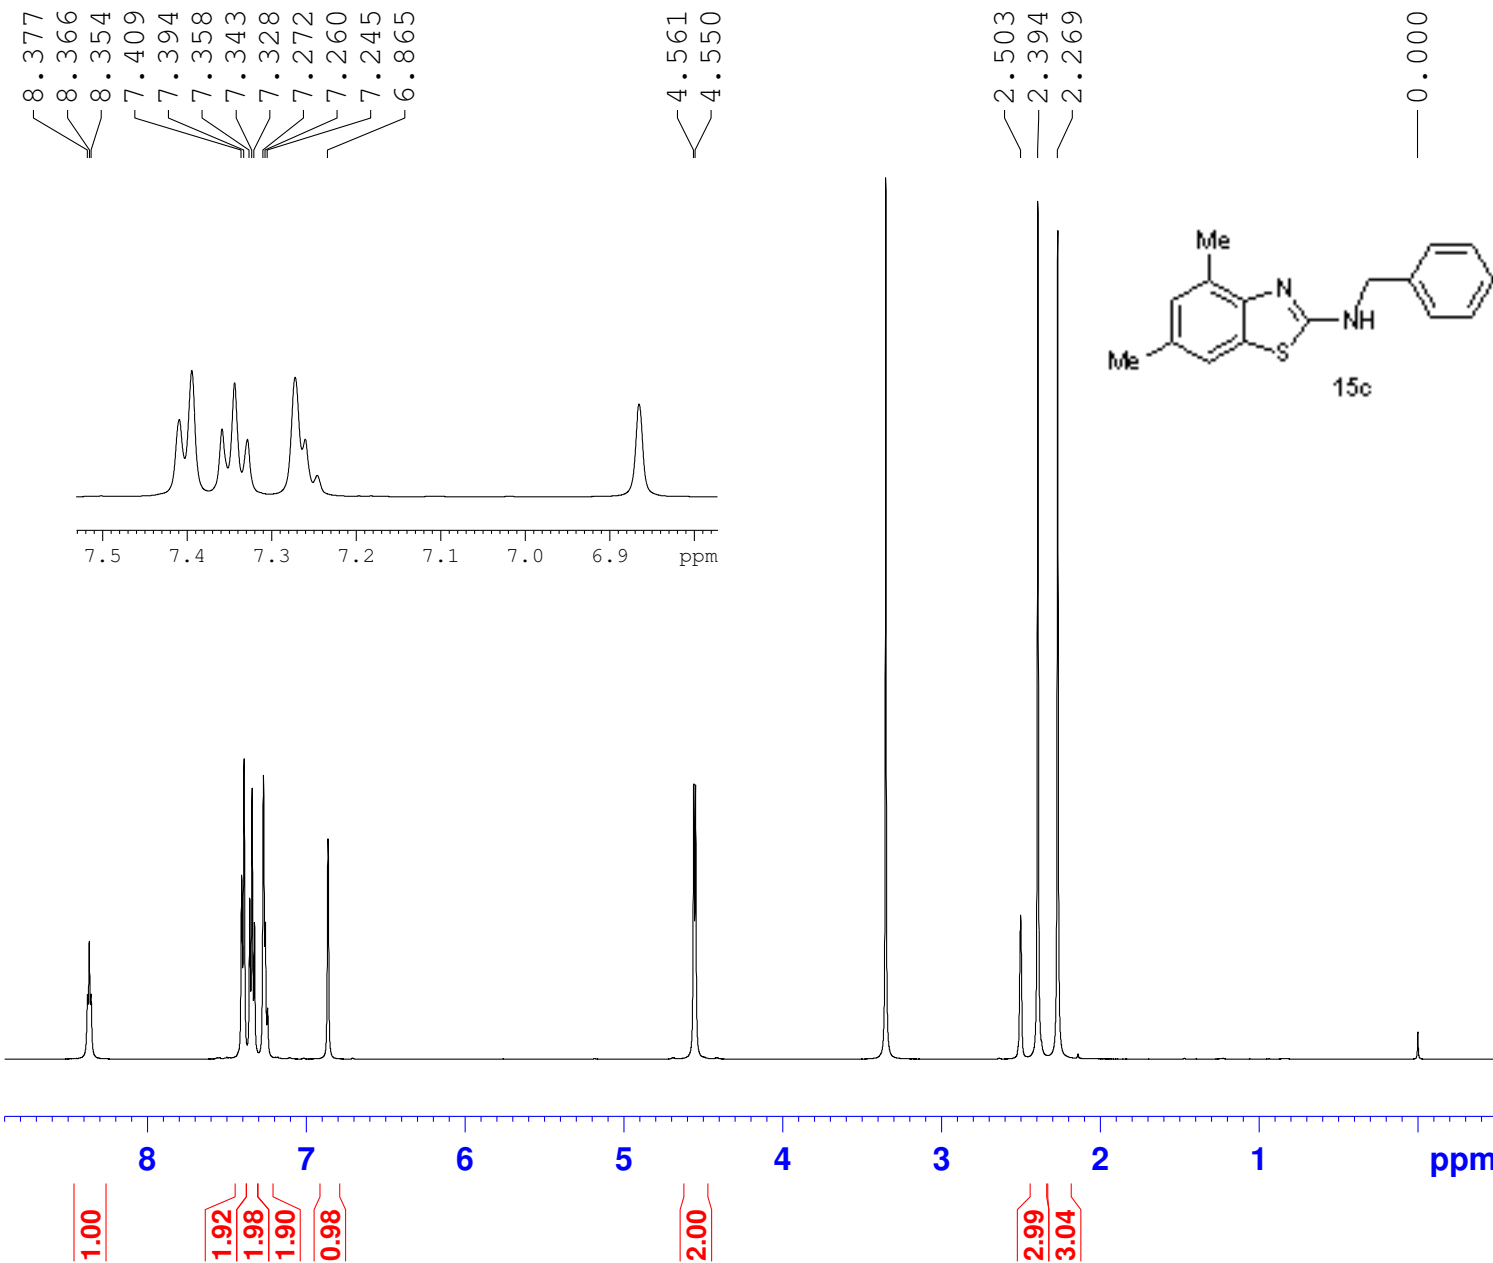

NAME 600-700  
EXPNO 638  
PROCNO 1  
Date\_ 20110120  
Time 11.02  
INSTRUM spect  
PROBHD 5 mm PABBO BB-  
PULPROG zg30  
TD 65536  
SOLVENT DMSO  
NS 16  
DS 2  
SWH 10330.578 Hz  
FIDRES 0.157632 Hz  
AQ 3.1719923 sec  
RG 114  
DW 48.400 usec  
DE 6.50 usec  
TE 294.2 K  
D1 1.00000000 sec

==== CHANNEL f1 =====  
NUC1 1H  
P1 11.50 usec  
SI 65536  
SF 500.0300023 MHz  
WDW EM  
SSB 0  
LB 0.30 Hz  
GB 0  
PC 1.00

N-benzyl-4,6-dimethylbenzo[d]thiazol-2-amine  
C13CPD DMSO-d6

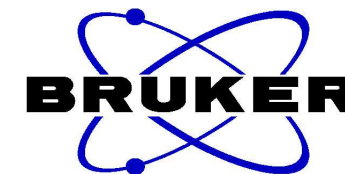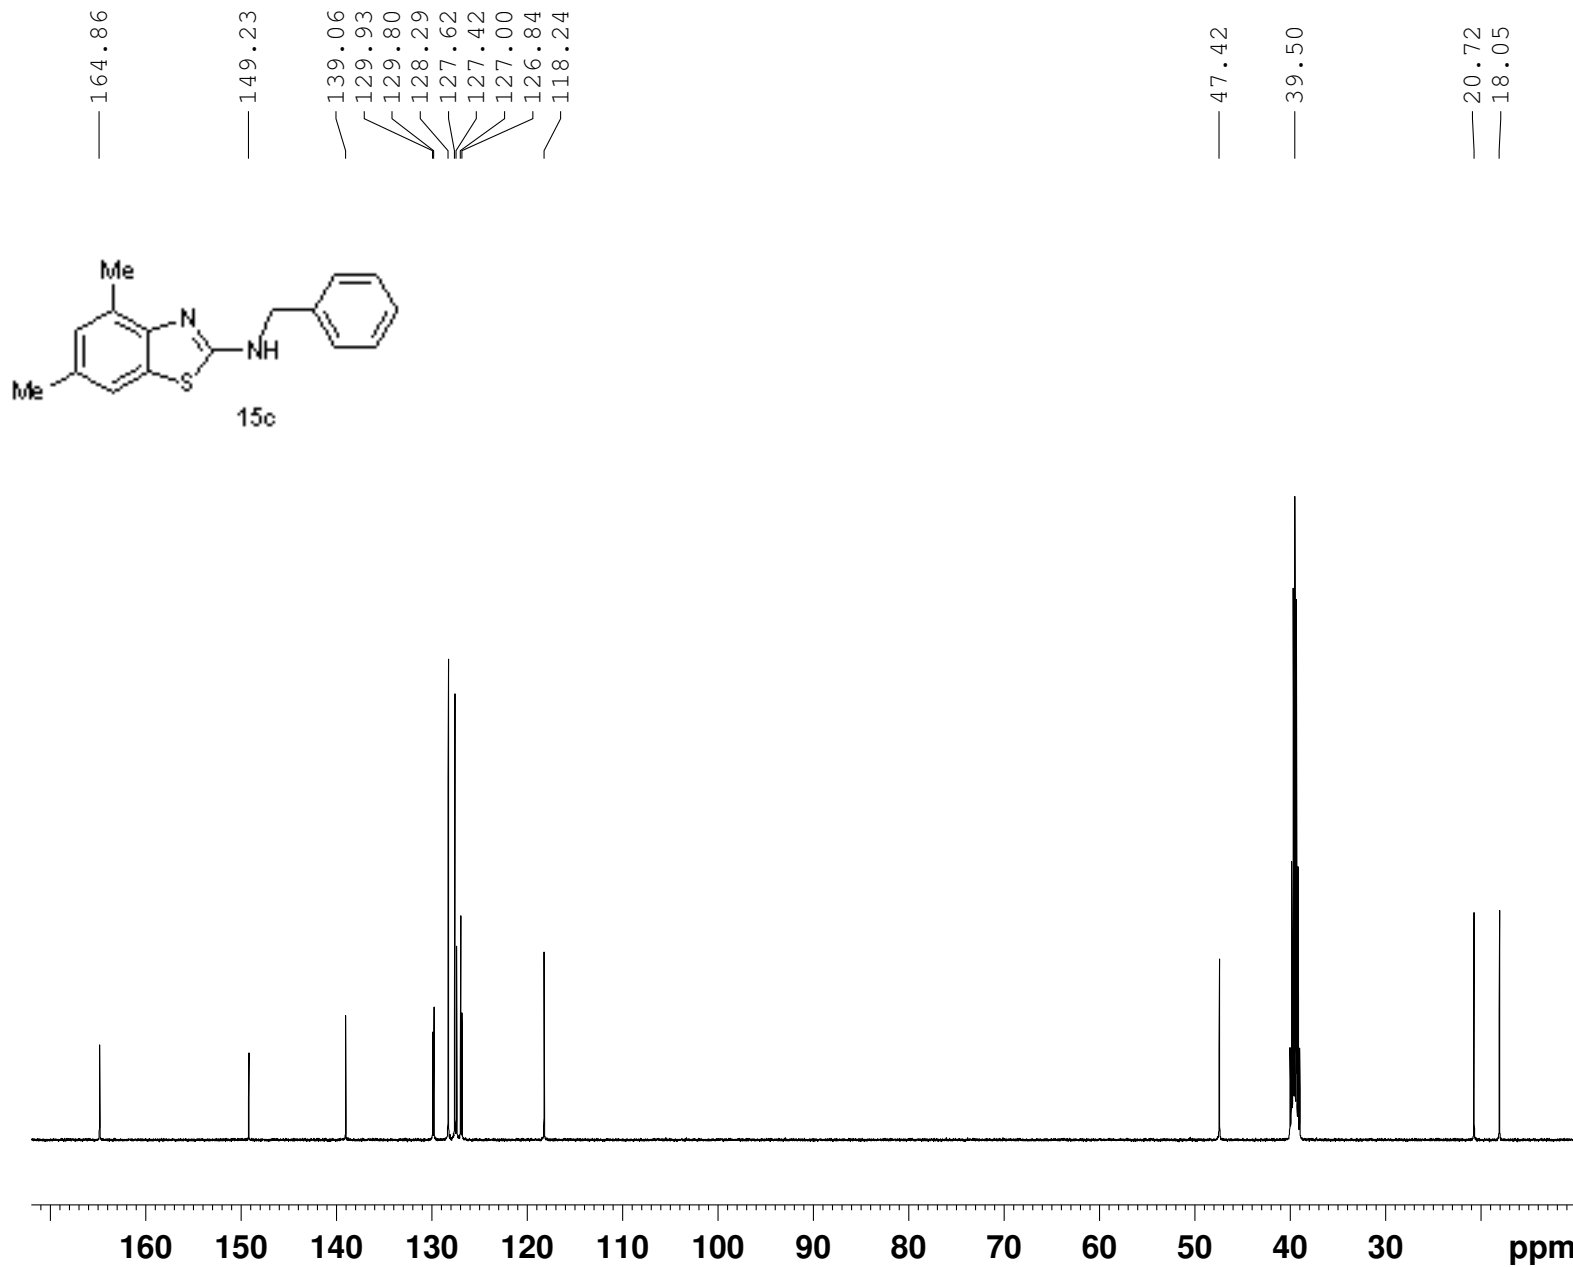

NAME 600-700  
EXPNO 641  
PROCNO 1  
Date\_ 20110120  
Time 13.23  
INSTRUM spect  
PROBHD 5 mm PABBO BB-  
PULPROG zgpg30  
TD 65536  
SOLVENT DMSO  
NS 1228  
DS 4  
SWH 29761.904 Hz  
FIDRES 0.454131 Hz  
AQ 1.1010548 sec  
RG 203  
DW 16.800 usec  
DE 6.50 usec  
TE 295.7 K  
D1 2.0000000 sec  
D11 0.0300000 sec

==== CHANNEL f1 =====  
NUC1 13C  
P1 9.60 usec  
SI 32768  
SF 125.7327058 MHz  
WDW EM  
SSB 0  
LB 1.00 Hz  
GB 0  
PC 1.40

N-benzyl-6-methoxybenzo[d]thiazol-2-amine  
PROTON DMSO-d6

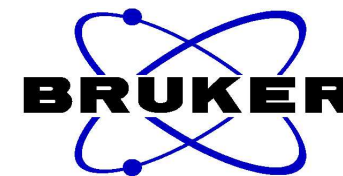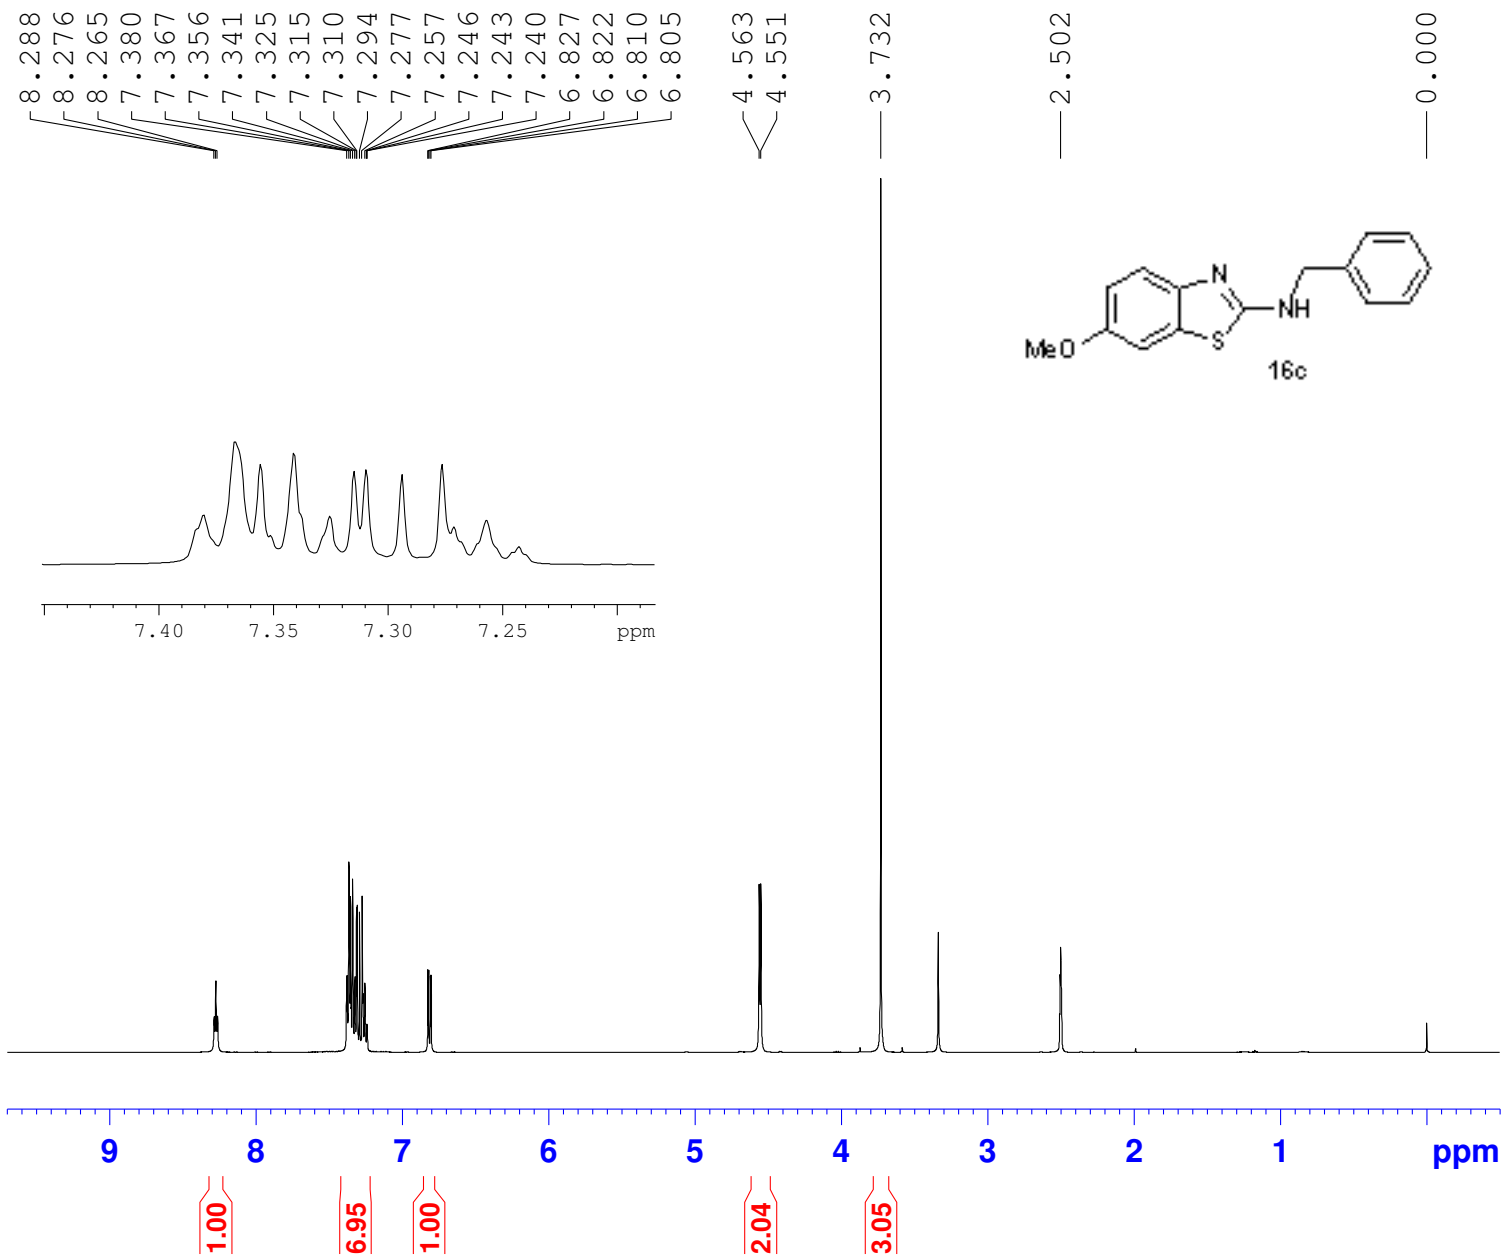

```
NAME 3
EXPNO 608
PROCNO 1
Date_ 20101230
Time 1.16
INSTRUM spect
PROBHD 5 mm PABBO BB-
PULPROG zg30
TD 65536
SOLVENT DMSO
NS 16
DS 2
SWH 10330.578 Hz
FIDRES 0.157632 Hz
AQ 3.1719923 sec
RG 64
DW 48.400 usec
DE 6.50 usec
TE 295.7 K
D1 1.00000000 sec
```

```
===== CHANNEL f1 =====
NUC1 1H
P1 11.50 usec
SI 32768
SF 500.0300017 MHz
WDW EM
SSB 0
LB 0.30 Hz
GB 0
PC 1.00
```



N-benzyl-6--methoxybenzo[d]thiazol-2-amine  
C13CPD DMSO-d6

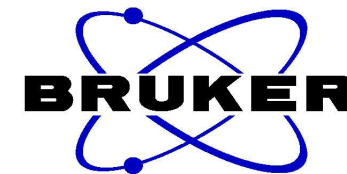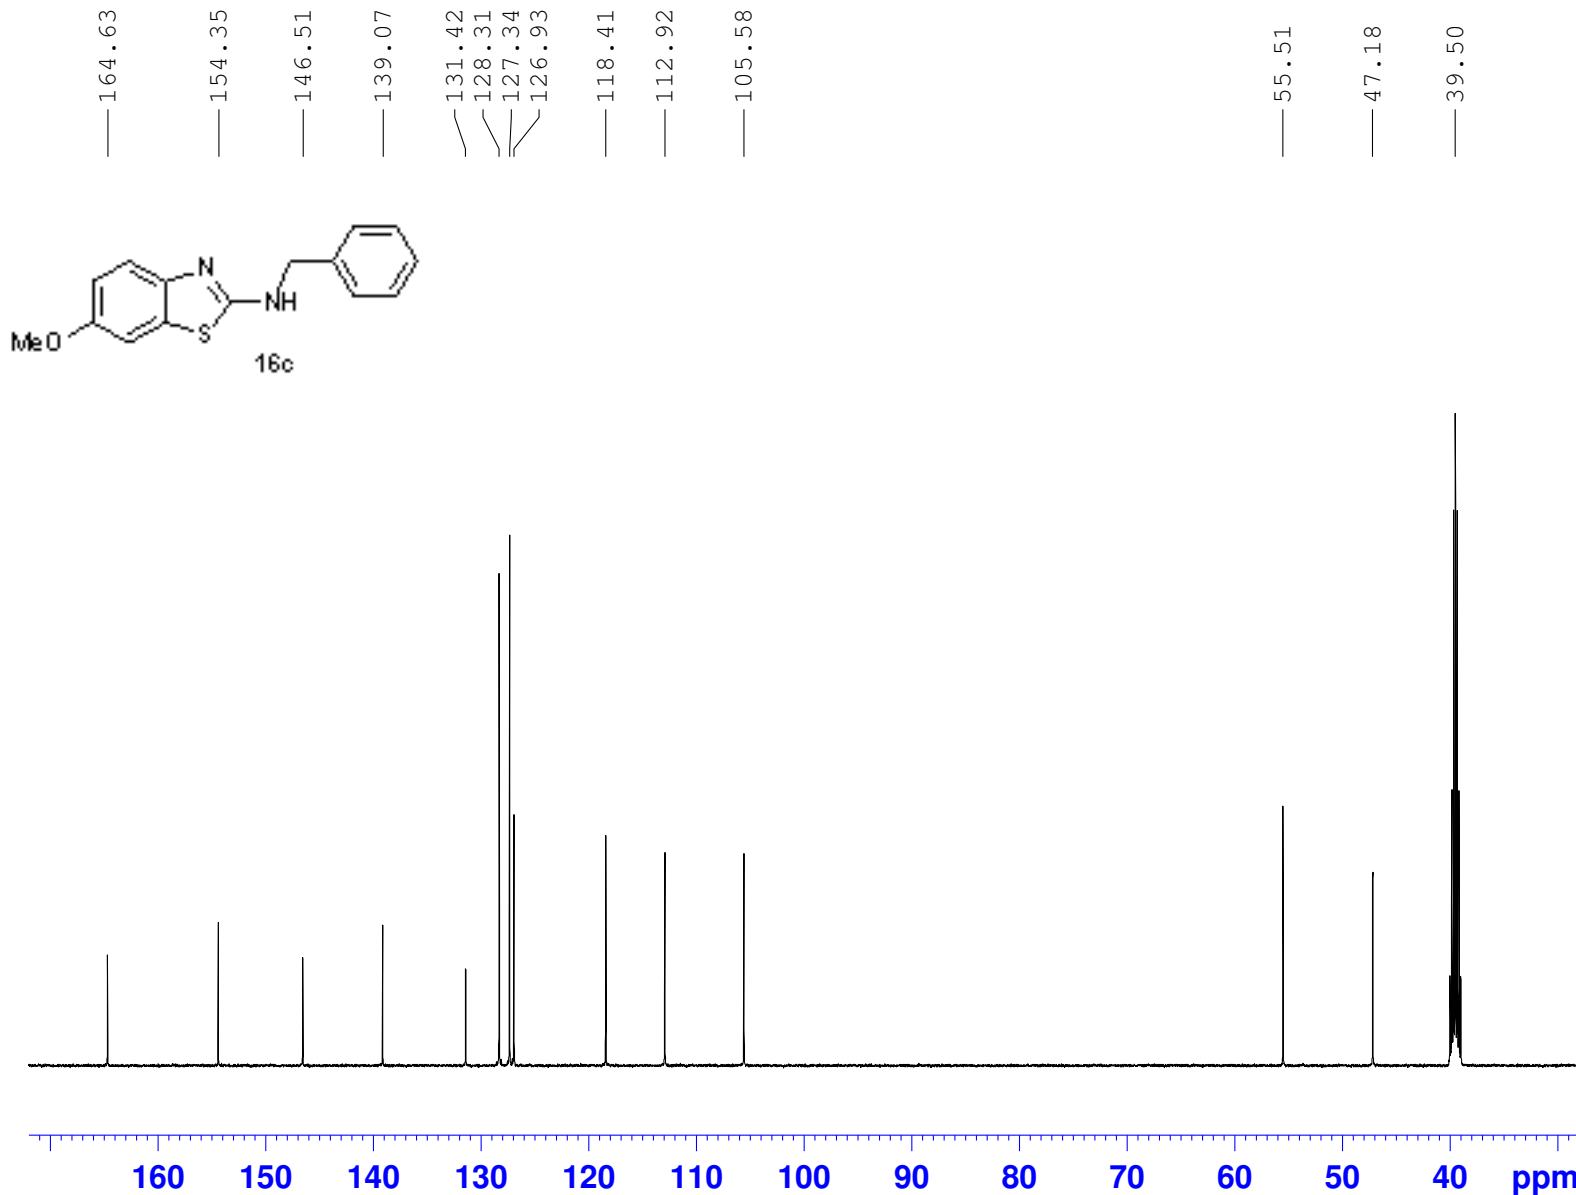

```
NAME 3
EXPNO 609
PROCNO 1
Date_ 20101230
Time 4.45
INSTRUM spect
PROBHD 5 mm PABBO BB-
PULPROG zgpg30
TD 65536
SOLVENT DMSO
NS 745
DS 4
SWH 29761.904 Hz
FIDRES 0.454131 Hz
AQ 1.1010548 sec
RG 203
DW 16.800 usec
DE 6.50 usec
TE 297.0 K
D1 2.0000000 sec
D11 0.0300000 sec

===== CHANNEL f1 =====
NUC1 13C
P1 9.60 usec
SI 32768
SF 125.7327077 MHz
WDW EM
SSB 0
LB 1.00 Hz
GB 0
PC 1.40
```

N-benzyl-6-(methylthio)benzo[d]thiazol-2-amine  
PROTON DMSO-d6

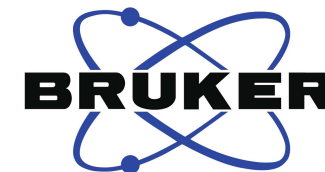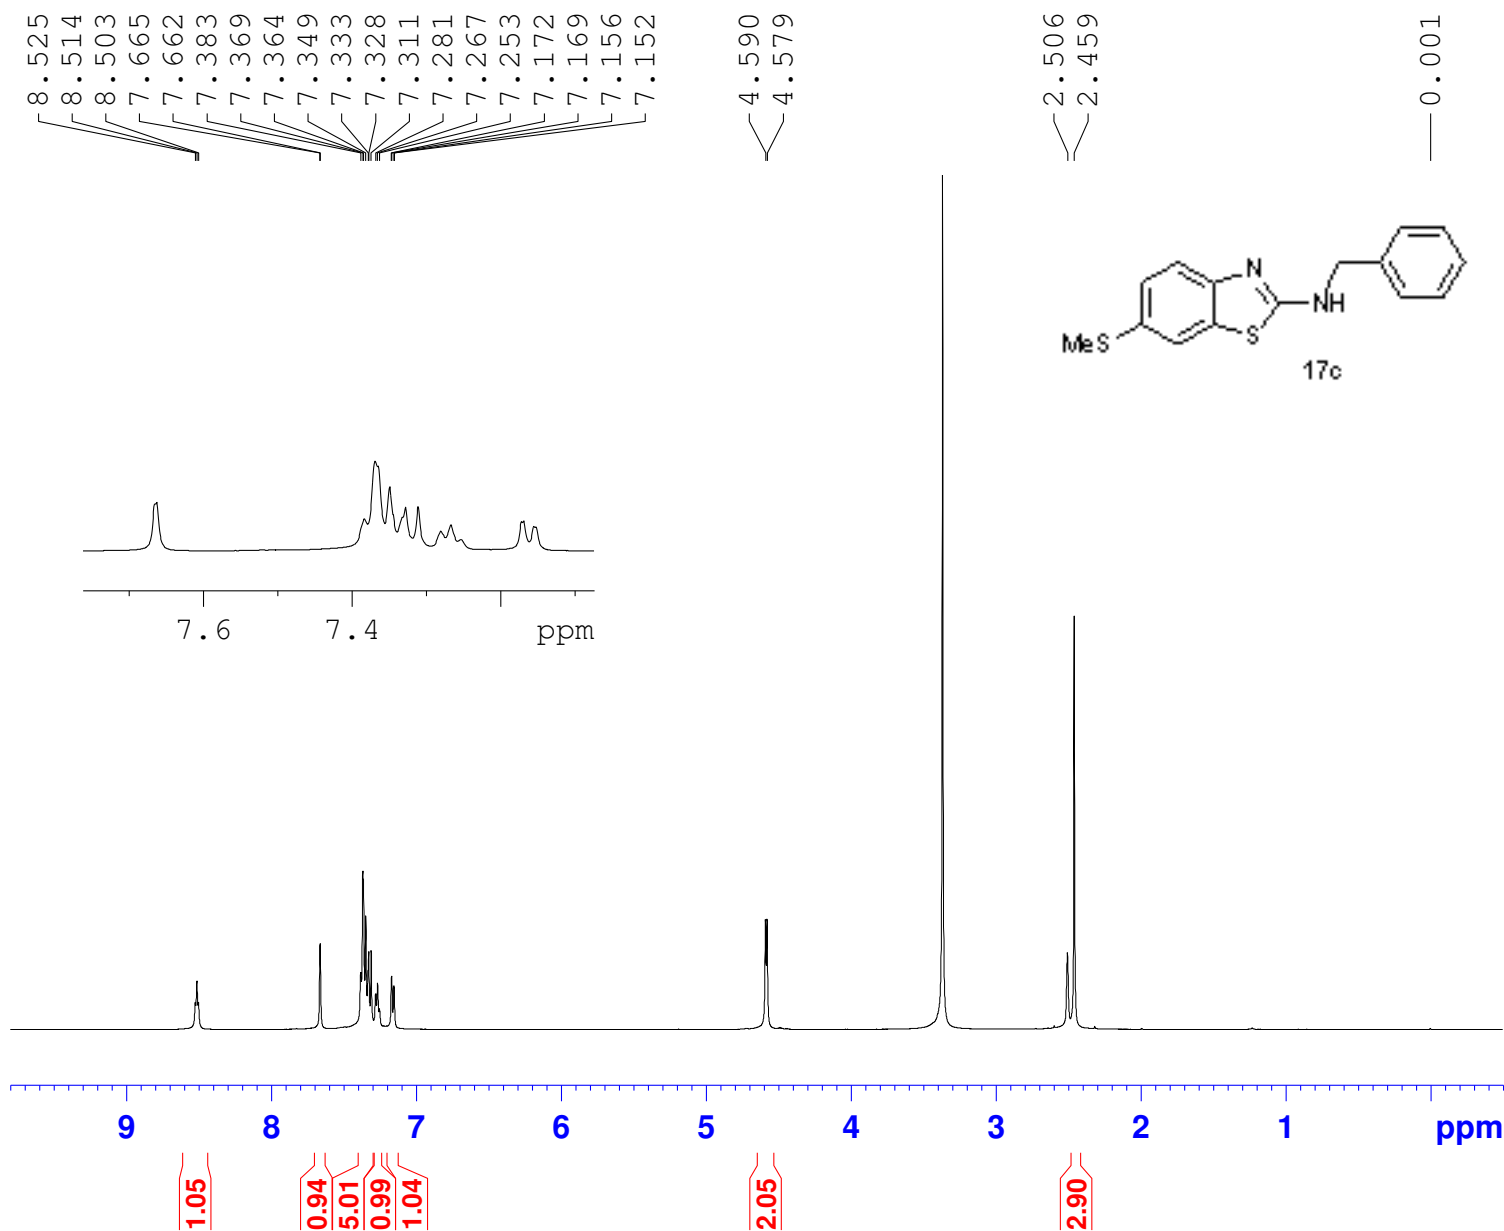

Current Data Parameters  
NAME Lifeng-1H  
EXPNO 583  
PROCNO 1

F2 - Acquisition Parameters  
Date\_ 20101130  
Time 5.17  
INSTRUM spect  
PROBHD 5 mm PABBO BB-  
PULPROG zg30  
TD 65536  
SOLVENT DMSO  
NS 16  
DS 2  
SWH 10330.578 Hz  
FIDRES 0.157632 Hz  
AQ 3.1719923 sec  
RG 181  
DW 48.400 usec  
DE 6.50 usec  
TE 293.3 K  
D1 1.0000000 sec  
TD0 1

==== CHANNEL f1 =====  
NUC1 1H  
P1 11.50 usec  
PL1 1.10 dB  
PL1W 16.96364784 W  
SFO1 500.0330879 MHz

F2 - Processing parameters  
SI 32768  
SF 500.0300000 MHz  
WDW EM  
SSB 0  
LB 0.30 Hz  
GB 0  
PC 1.00

N-benzyl-6-(methylthio)benzo[d]thiazol-2-amine  
C13CPD DMSO-d6

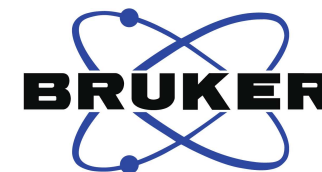

166.03  
150.64  
138.81  
131.59  
129.27  
128.34  
127.37  
127.01  
125.56  
119.86  
118.30

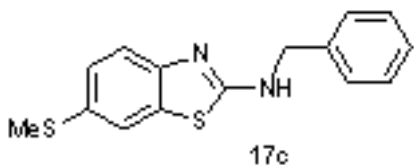

47.22  
39.50

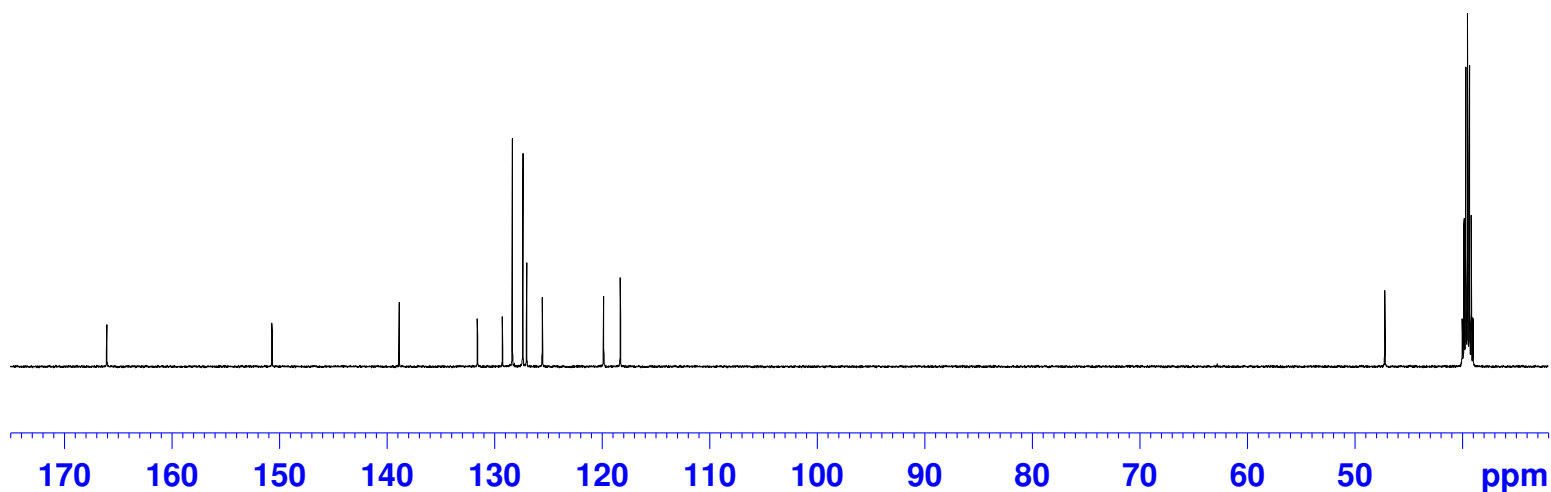

Current Data Parameters  
NAME Lifeng-1H  
EXPNO 575  
PROCNO 1

F2 - Acquisition Parameters  
Date\_ 20101121  
Time 23.55  
INSTRUM spect  
PROBHD 5 mm PABBO BB-  
PULPROG zgpg30  
TD 65536  
SOLVENT DMSO  
NS 600  
DS 4  
SWH 29761.904 Hz  
FIDRES 0.454131 Hz  
AQ 1.1010548 sec  
RG 203  
DW 16.800 usec  
DE 6.50 usec  
TE 296.7 K  
D1 2.00000000 sec  
D11 0.03000000 sec  
TDO 1

==== CHANNEL f1 =====  
NUC1 13C  
P1 9.60 usec  
PL1 -1.00 dB  
PL1W 125.85865021 W  
SFO1 125.7452168 MHz

==== CHANNEL f2 =====  
CPDPRG2 waltz16  
NUC2 1H  
PCPD2 80.00 usec  
PL2 1.10 dB  
PL12 17.95 dB  
PL13 17.95 dB  
PL2W 16.96364784 W  
PL12W 0.35036376 W  
PL13W 0.35036376 W  
SFO2 500.0320001 MHz

F2 - Processing parameters  
SI 32768  
SF 125.7327077 MHz  
WDW EM  
SSB 0  
LB 1.00 Hz  
GB 0  
PC 1.40

N-benzyl-6-fluorobenzo[d]thiazol-2-amine  
PROTON DMSO-d6

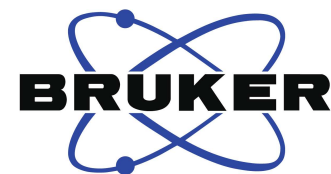

8.500  
8.489  
8.477  
7.617  
7.612  
7.600  
7.595  
7.384  
7.371  
7.368  
7.363  
7.349  
7.333  
7.280  
7.266  
7.252  
7.072  
7.067  
7.054  
7.048  
7.036  
7.030  
— 4.579

— 2.505  
— 0.000

Current Data Parameters  
NAME Lifeng-1H  
EXPNO 196  
PROCNO 1

F2 - Acquisition Parameters  
Date\_ 20100904  
Time 3.18  
INSTRUM spect  
PROBHD 5 mm PABBO BB-  
PULPROG zg30  
TD 65536  
SOLVENT DMSO  
NS 16  
DS 2  
SWH 10330.578 Hz  
FIDRES 0.157632 Hz  
AQ 3.1719923 sec  
RG 4  
DW 48.400 usec  
DE 6.50 usec  
TE 297.6 K  
D1 1.00000000 sec  
TD0 1

===== CHANNEL f1 =====  
NUC1 1H  
P1 11.50 usec  
PL1 1.10 dB  
PL1W 16.96364784 W  
SFO1 500.0330879 MHz

F2 - Processing parameters  
SI 32768  
SF 500.0300004 MHz  
WDW EM  
SSB 0  
LB 0.30 Hz  
GB 0  
PC 1.00

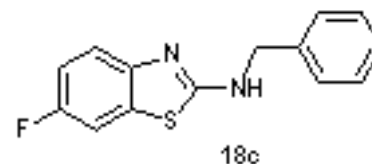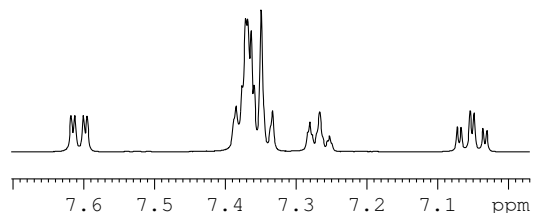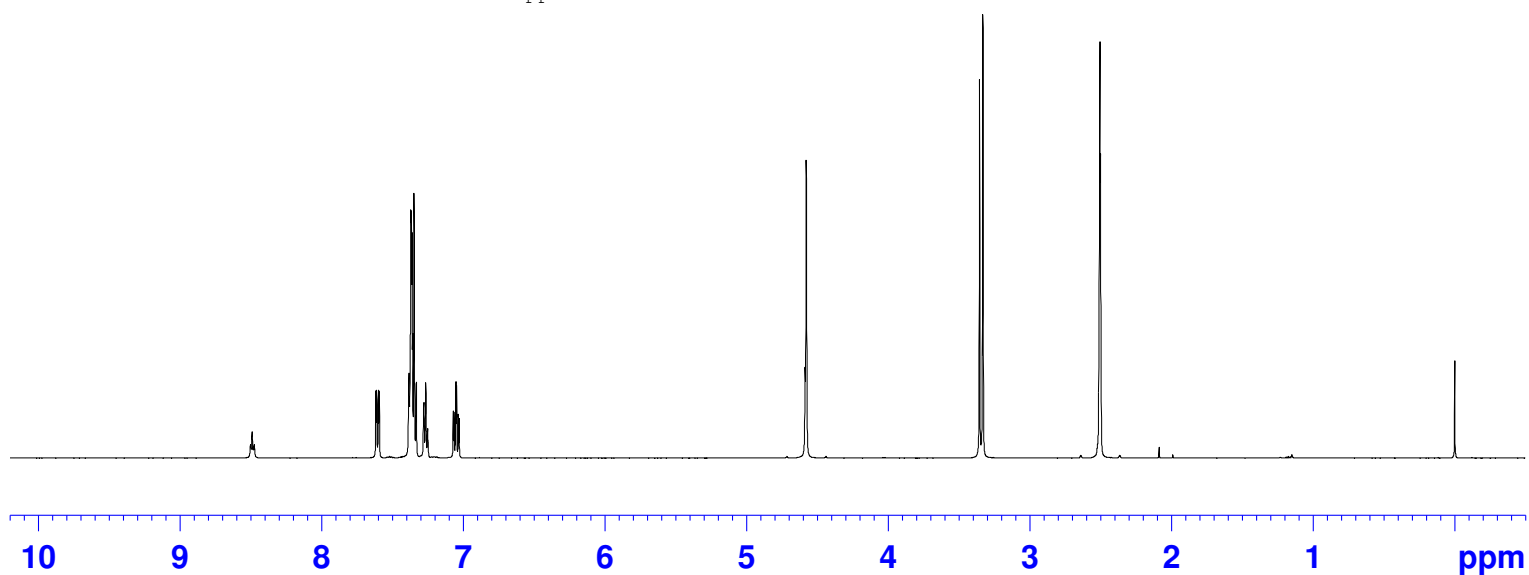

0.33  
0.92  
4.73  
0.92  
0.97

2.00

N-benzyl-6-fluorobenzo[d]thiazol-2-amine  
C13CPD DMSO-d6

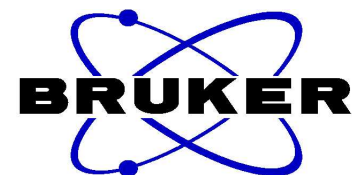

166.10  
165.99  
158.13  
156.26  
149.09  
138.79  
131.46  
131.37  
128.35  
127.36  
127.02  
118.51  
118.45  
112.90  
112.71  
107.95  
107.74

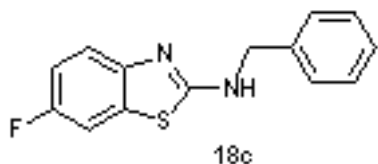

47.21  
47.08  
39.50

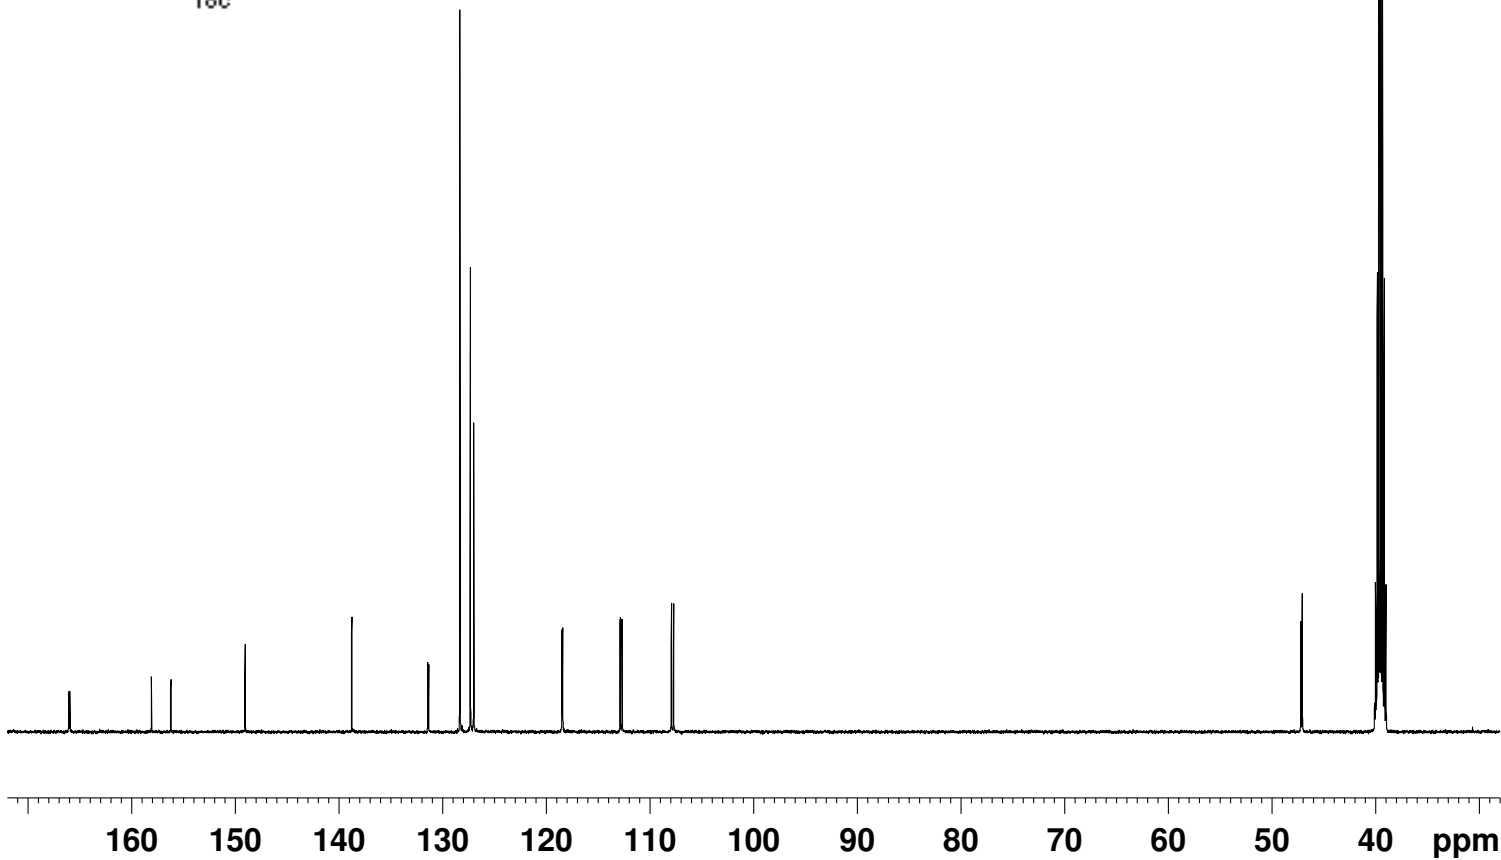

NAME Shx-1  
EXPNO 206  
PROCNO 1  
Date\_ 20100905  
Time 17.38  
INSTRUM spect  
PROBHD 5 mm PABBO BB-  
PULPROG zgpg30  
TD 65536  
SOLVENT DMSO  
NS 2048  
DS 4  
SWH 29761.904 Hz  
FIDRES 0.454131 Hz  
AQ 1.1010548 sec  
RG 203  
DW 16.800 usec  
DE 6.50 usec  
TE 299.7 K  
D1 2.00000000 sec  
D11 0.03000000 sec  
TD0 1

==== CHANNEL f1 =====  
NUC1 13C  
P1 9.60 usec  
PL1 -1.00 dB  
PL1W 125.85865021 W  
SFO1 125.7452168 MHz

==== CHANNEL f2 =====  
CPDPRG2 waltz16  
NUC2 1H  
PCPD2 80.00 usec  
PL2 1.10 dB  
PL12 17.95 dB  
PL13 17.95 dB  
PL2W 16.96364784 W  
PL12W 0.35036376 W  
PL13W 0.35036376 W  
SFO2 500.0320001 MHz  
SI 32768  
SF 125.7327068 MHz  
WDW EM  
SSB 0  
LB 1.00 Hz  
GB 0  
PC 1.40

N-benzyl-6-chlorobenzo[d]thiazol-2-amine  
PROTON DMSO-d6



8.623  
7.803  
7.368  
7.351  
7.283  
7.271  
7.238  
7.222

4.596  
4.588

2.504

0.000

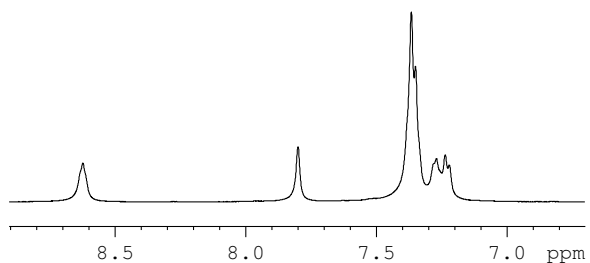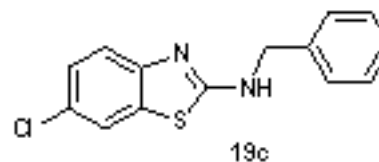

```
NAME          3
EXPNO         606
PROCNO        1
Date_         20101230
Time          3.59
INSTRUM       spect
PROBHD        5 mm PABBO BB-
PULPROG       zg30
TD            65536
SOLVENT       DMSO
NS            16
DS            2
SWH           10330.578 Hz
FIDRES        0.157632 Hz
AQ            3.1719923 sec
RG            64
DW            48.400 usec
DE            6.50 usec
TE            295.6 K
D1            1.00000000 sec
```

```
===== CHANNEL f1 =====
NUC1           1H
P1             11.50 usec
SI             32768
SF             500.0300012 MHz
WDW            EM
SSB            0
LB             0.30 Hz
GB             0
PC             1.00
```

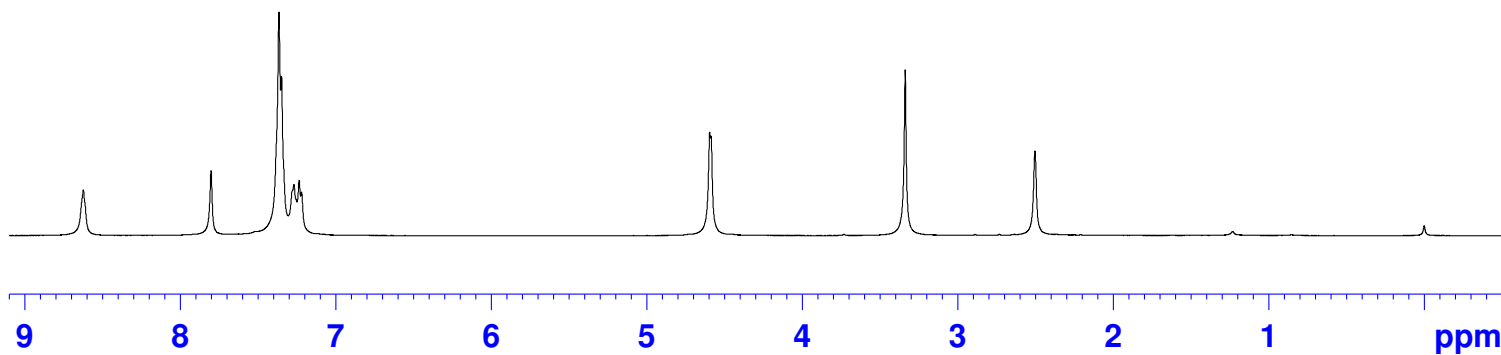

0.95

0.86

6.90

2.00

N-benzyl-6-chlorobenzo[d]thiazol-2-amine  
C13CPD DMSO-d6

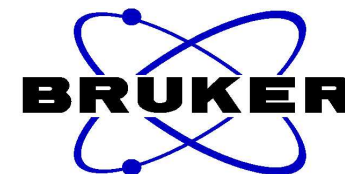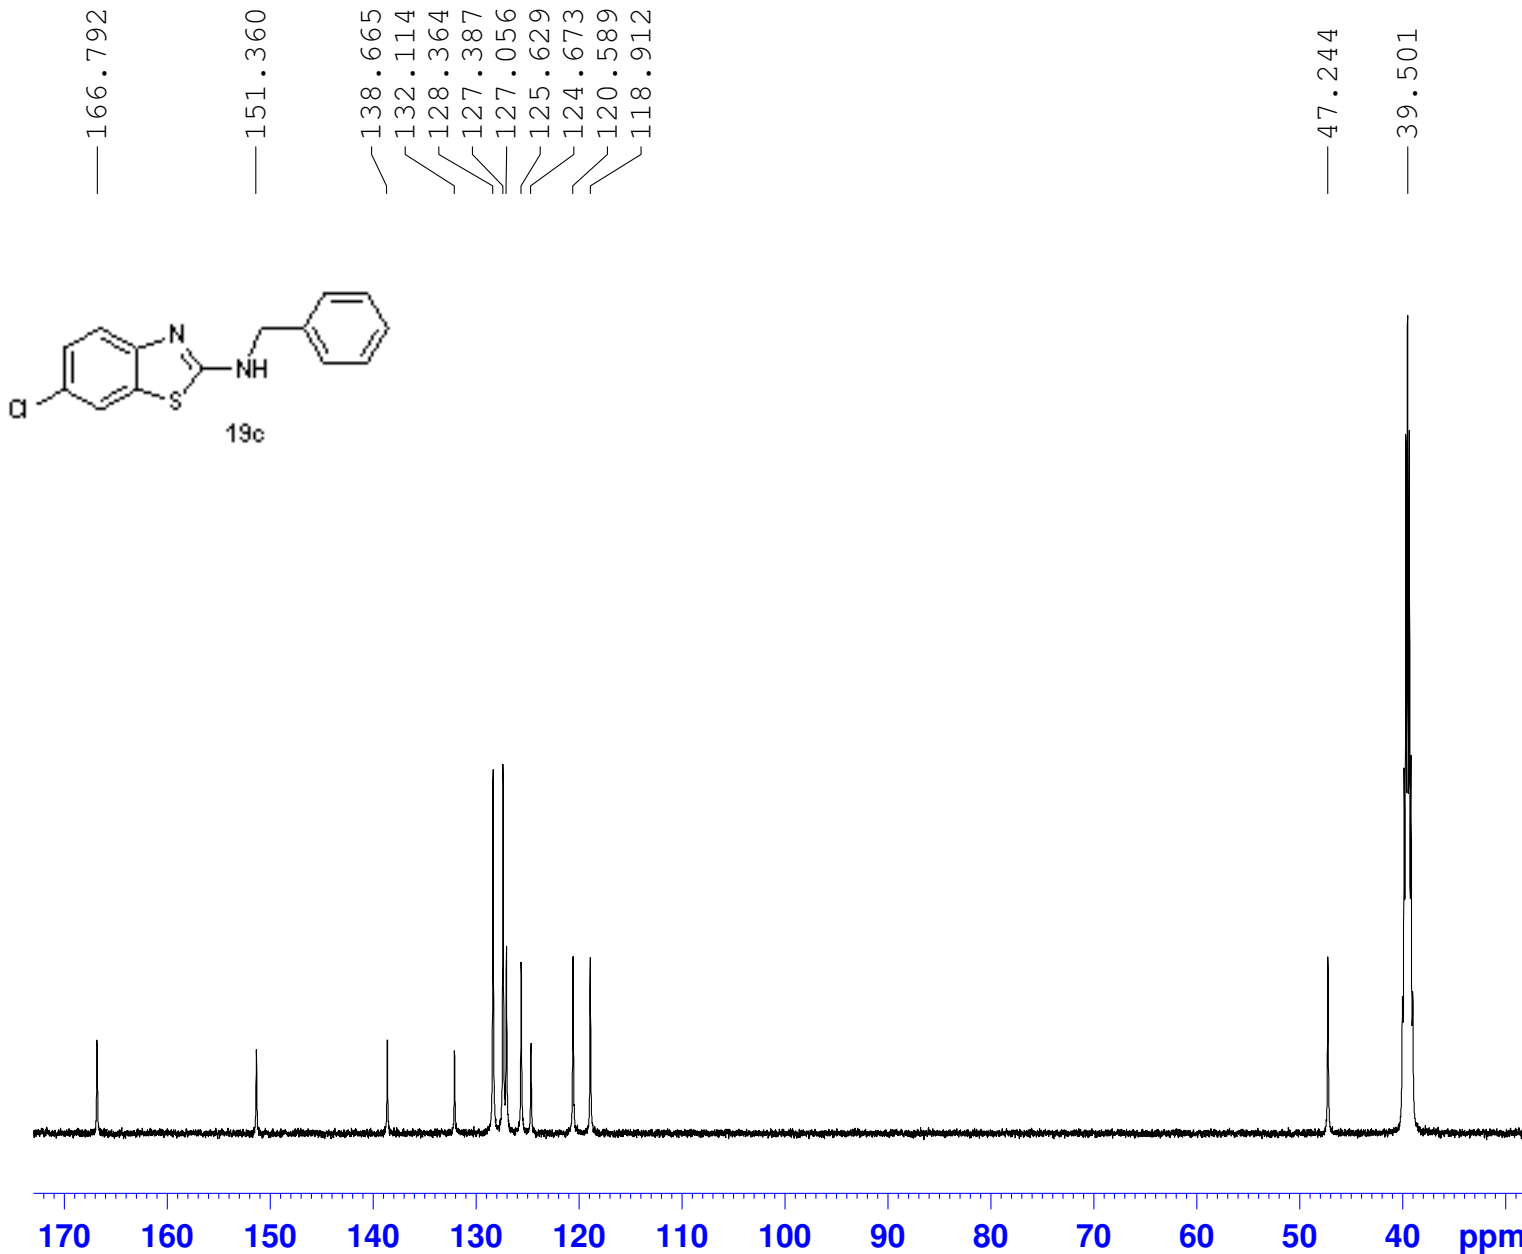

```
NAME 3
EXPNO 607
PROCNO 1
Date_ 20101230
Time 6.08
INSTRUM spect
PROBHD 5 mm PABBO BB-
PULPROG zgpg30
TD 65536
SOLVENT DMSO
NS 1075
DS 4
SWH 29761.904 Hz
FIDRES 0.454131 Hz
AQ 1.1010548 sec
RG 203
DW 16.800 usec
DE 6.50 usec
TE 297.0 K
D1 2.00000000 sec
D11 0.03000000 sec
```

```
===== CHANNEL f1 =====
NUC1 13C
P1 9.60 usec
SI 32768
SF 125.7327076 MHz
WDW EM
SSB 0
LB 1.00 Hz
GB 0
PC 1.40
```

N-benzyl-6-(trifluoromethoxy)benzo[d]thiazol-2-amine  
PROTON DMSO-d<sub>6</sub>

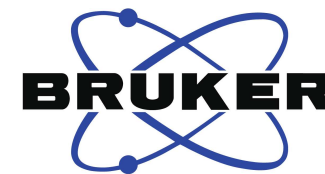

8.680  
8.670  
8.659  
7.806  
7.437  
7.420  
7.386  
7.370  
7.352  
7.337  
7.285  
7.272  
7.258  
7.204  
7.187

4.610  
4.601

2.504

0.000

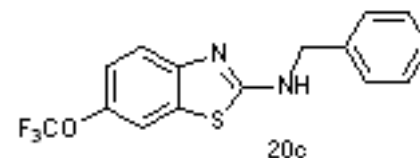

Current Data Parameters  
NAME Lifeng-1H  
EXPNO 578  
PROCNO 1

F2 - Acquisition Parameters  
Date\_ 20101122  
Time 5.01  
INSTRUM spect  
PROBHD 5 mm PABBO BB-  
PULPROG zg30  
TD 65536  
SOLVENT DMSO  
NS 16  
DS 2  
SWH 10330.578 Hz  
FIDRES 0.157632 Hz  
AQ 3.171923 sec  
RG 181  
DW 48.400 usec  
DE 6.50 usec  
TE 295.2 K  
D1 1.00000000 sec  
TD0 1

==== CHANNEL f1 =====  
NUC1 1H  
P1 11.50 usec  
PL1 1.10 dB  
PL1W 16.96364784 W  
SFO1 500.0330879 MHz

F2 - Processing parameters  
SI 32768  
SF 500.0300007 MHz  
WDW EM  
SSB 0  
LB 0.30 Hz  
GB 0  
PC 1.00

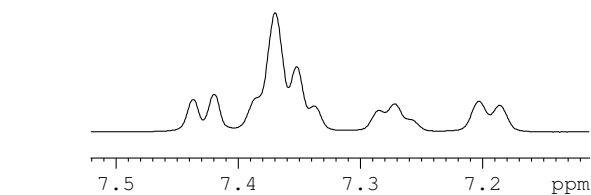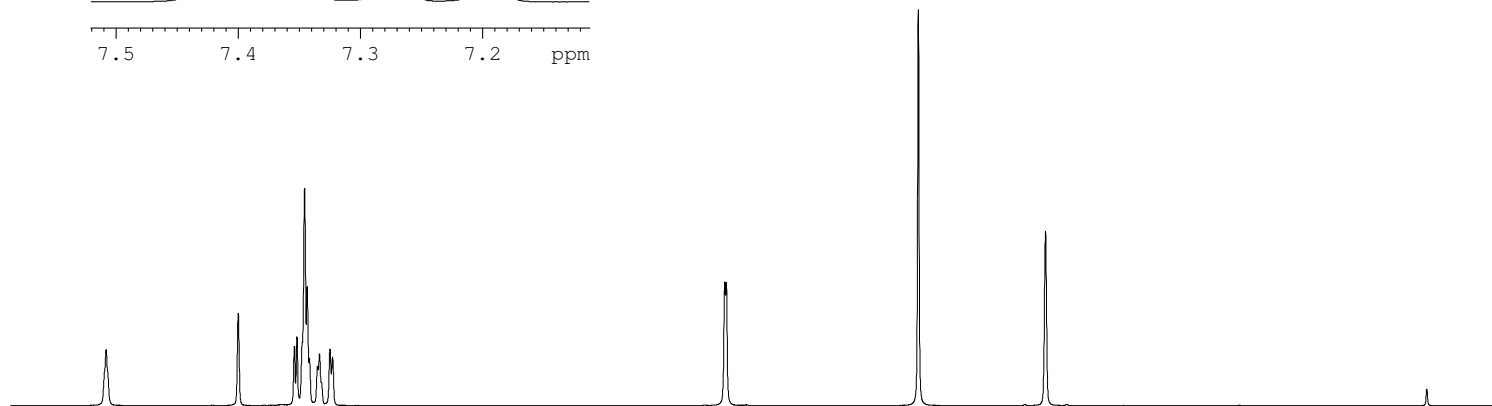

1.02  
0.92  
1.01  
3.92  
0.98  
1.02

2.00

9 8 7 6 5 4 3 2 1 ppm



N-benzyl-6-(trifluoromethoxy)benzo[d]thiazol-2-amine  
C13CPD DMSO-d6

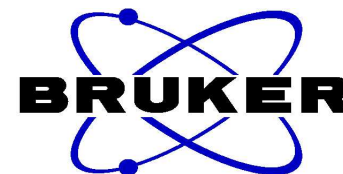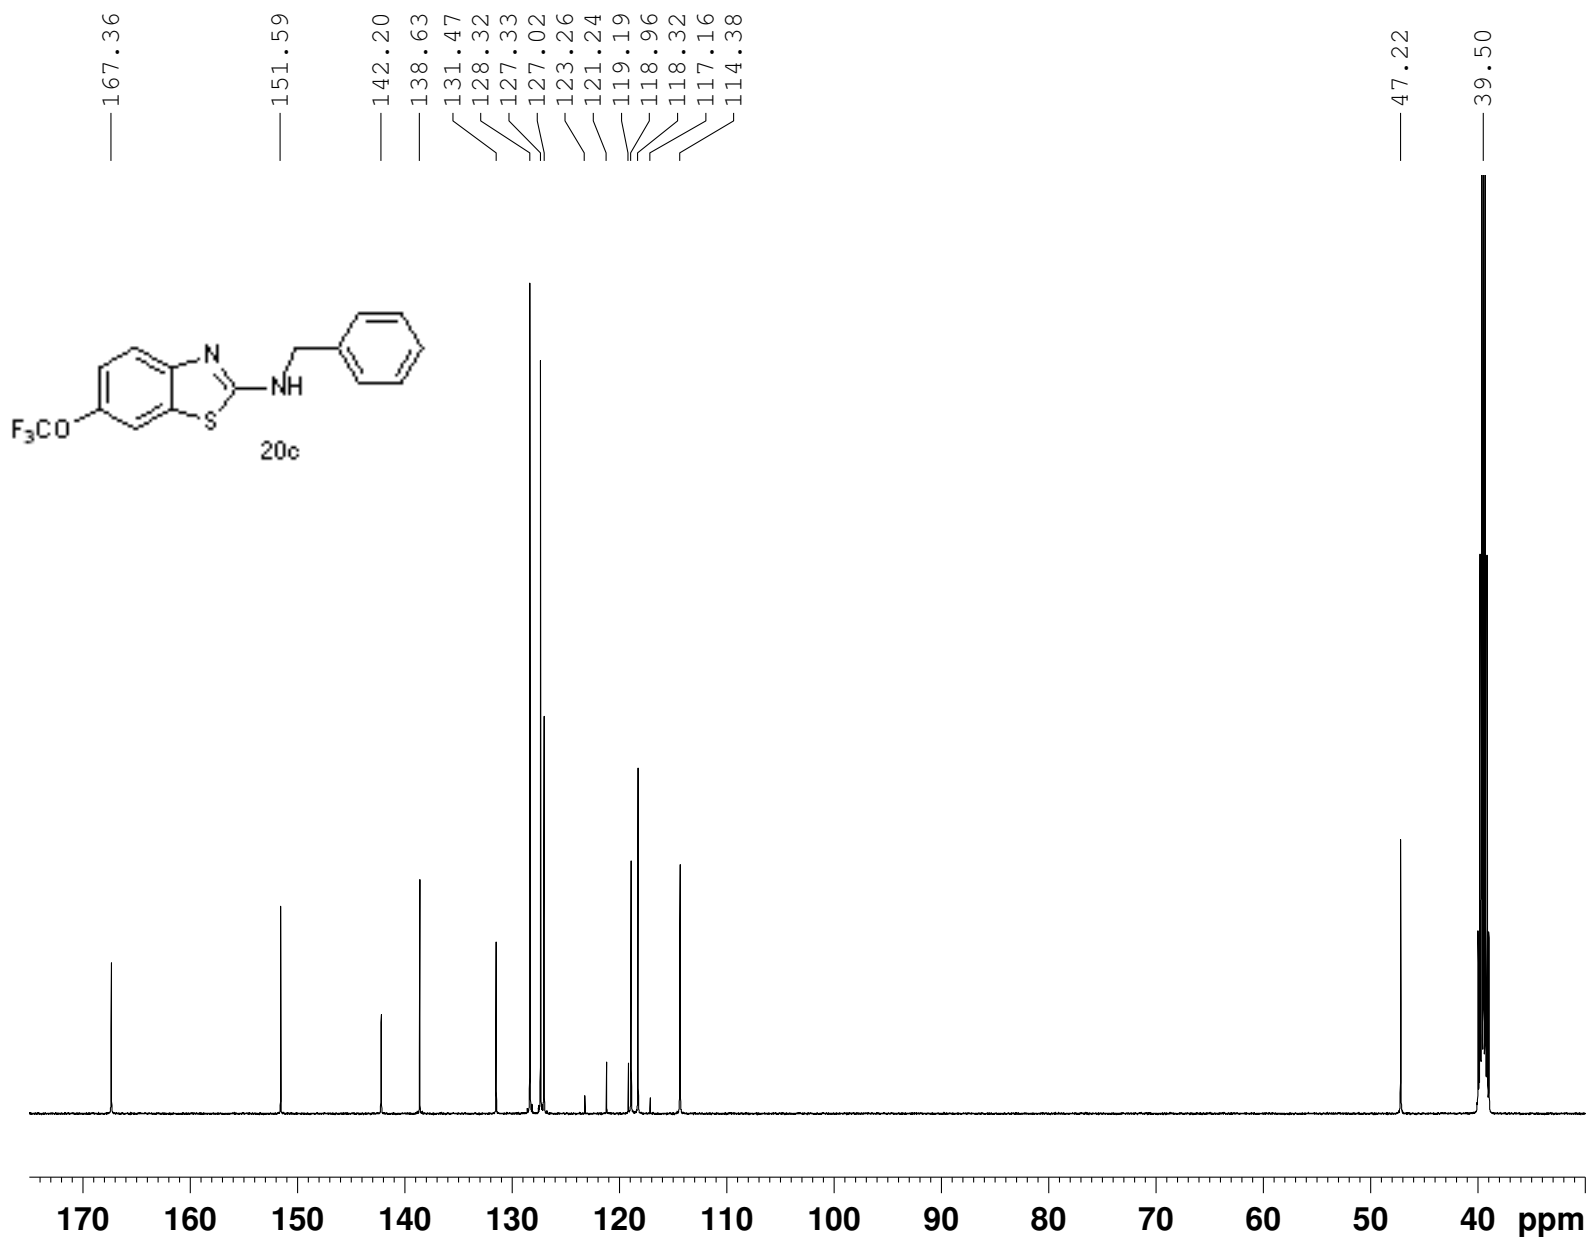

NAME Shx-1  
EXPNO 579  
PROCNO 1  
Date\_ 20101205  
Time 15.01  
INSTRUM spect  
PROBHD 5 mm PABBO BB-  
PULPROG zgpg30  
TD 65536  
SOLVENT DMSO  
NS 10240  
DS 4  
SWH 29761.904 Hz  
FIDRES 0.454131 Hz  
AQ 1.1010548 sec  
RG 203  
DW 16.800 usec  
DE 6.50 usec  
TE 299.1 K  
D1 2.00000000 sec  
D11 0.03000000 sec  
TD0 1

==== CHANNEL f1 =====  
NUC1 13C  
P1 9.60 usec  
PL1 -1.00 dB  
PL1W 125.85865021 W  
SFO1 125.7452168 MHz

==== CHANNEL f2 =====  
CPDPRG2 waltz16  
NUC2 1H  
PCPD2 80.00 usec  
PL2 1.10 dB  
PL12 17.95 dB  
PL13 17.95 dB  
PL2W 16.96364784 W  
PL12W 0.35036376 W  
PL13W 0.35036376 W  
SFO2 500.0320001 MHz  
SI 32768  
SF 125.7327113 MHz  
WDW EM  
SSB 0  
LB 1.00 Hz  
GB 0  
PC 1.40
